# Supplementary material for: Copper-catalyzed pentafluoroethylation of aryl/alkenyl iodides with pentafluoroethylsilane
Source: Royal Society of Chemistry journal article supplement (doi:10.1039/d4qo00433g), 2024-01-01

# Supporting Information

## Copper-Catalyzed Pentafluoroethylation of Aryl/Alkenyl Iodides with Pentafluoroethylsilane

Yihan Tang, and Gavin Chit Tsui\*<sup>[a]</sup>

[a] Tang, Y. and Prof. Gavin Chit Tsui

Department of Chemistry, The Chinese University of Hong Kong, Shatin, New Territories, Hong Kong  
SAR, China

E-mail: gctsui@cuhk.edu.hk

### Experimental Procedures and Spectral Data

#### Table of Contents:

|                                           |     |
|-------------------------------------------|-----|
| <b>I. General Experimental</b> .....      | S2  |
| <b>II. Materials</b> .....                | S2  |
| <b>III. Instrumentation</b> .....         | S2  |
| <b>IV. Experimental Procedures</b> .....  | S4  |
| <b>V. Optimization Tables</b> .....       | S9  |
| <b>VI. Proposed Catalytic Cycle</b> ..... | S14 |
| <b>VII. Reference</b> .....               | S15 |
| <b>VIII. Characterization</b> .....       | S16 |
| <b>IX. Spectra</b> .....                  | S32 |

## **I. General Experimental.**

Unless otherwise noted, reactions were carried out in a 10 mL glass tube with magnetic stirring. Reactions that require heating were carried out in the oil bath. Analytical thin layer chromatography (TLC) was performed with Merck silica gel 60 F<sub>254</sub> aluminum plates. Visualization was done under a UV lamp (254 nm) and by immersion in potassium permanganate (KMnO<sub>4</sub>), followed by heating using a heat gun. Organic solutions were concentrated by rotary evaporation at 23-35 °C. Purification of reaction products were generally done by flash column chromatography with Silicycle 60-230 mesh silica gel.

## **II. Materials.**

Halocarbon 125-Pentafluoroethane (Purity: 99.0% min., 9.1kg in 16 L size cylinder) was purchased from SCIENTIFIC GAS ENGINEERING CO., LTD. Copper(I) iodide (extra pure, 99.99%) was purchased from Acros. Potassium fluoride (97%) and anhydrous DMF was purchased from J&K Scientific. Other chemicals for substrates preparation were purchased from Acros, J&K Scientific, Aldrich, Bide and Dikemann.

## **III. Instrumentation.**

Proton nuclear magnetic resonance spectra (<sup>1</sup>H NMR), carbon nuclear magnetic resonance spectra (<sup>13</sup>C NMR) and fluorine nuclear magnetic resonance spectra (<sup>19</sup>F NMR) were recorded at 23 °C on Bruker 400 MHz or 500 MHz spectrometer in CDCl<sub>3</sub>. Chemical shifts of <sup>1</sup>H NMR spectra were reported as parts per million in  $\delta$  scale using residual solvent signal (CDCl<sub>3</sub>: 7.26 ppm) or tetramethylsilane (0.00 ppm) as internal standard. Chemical shifts of <sup>13</sup>C NMR spectra were reported using residual solvent signal of CDCl<sub>3</sub> (77.16 ppm) on the  $\delta$  scale. Chemical shifts of <sup>19</sup>F NMR were reported as parts per million in  $\delta$  scale using benzotrifluoride (-63.72 ppm) as internal standard. Data are represented as follows: chemical shift ( $\delta$  ppm), multiplicity (s = singlet, d = doublet, t = triplet, q = quartet, m = multiplet), coupling constant (*J*, Hz) and integration. High resolution mass spectra (HRMS) were obtained on a Finnigan MAT 95XL GC Mass Spectrometer or a Thermo Scientific Q Exactive Focus Mass Spectrometer or a Bruker Solarix 9.4T FTMS with Q Exactive Focus Orbitrap.

### Substrates 1 (Aryl iodides)

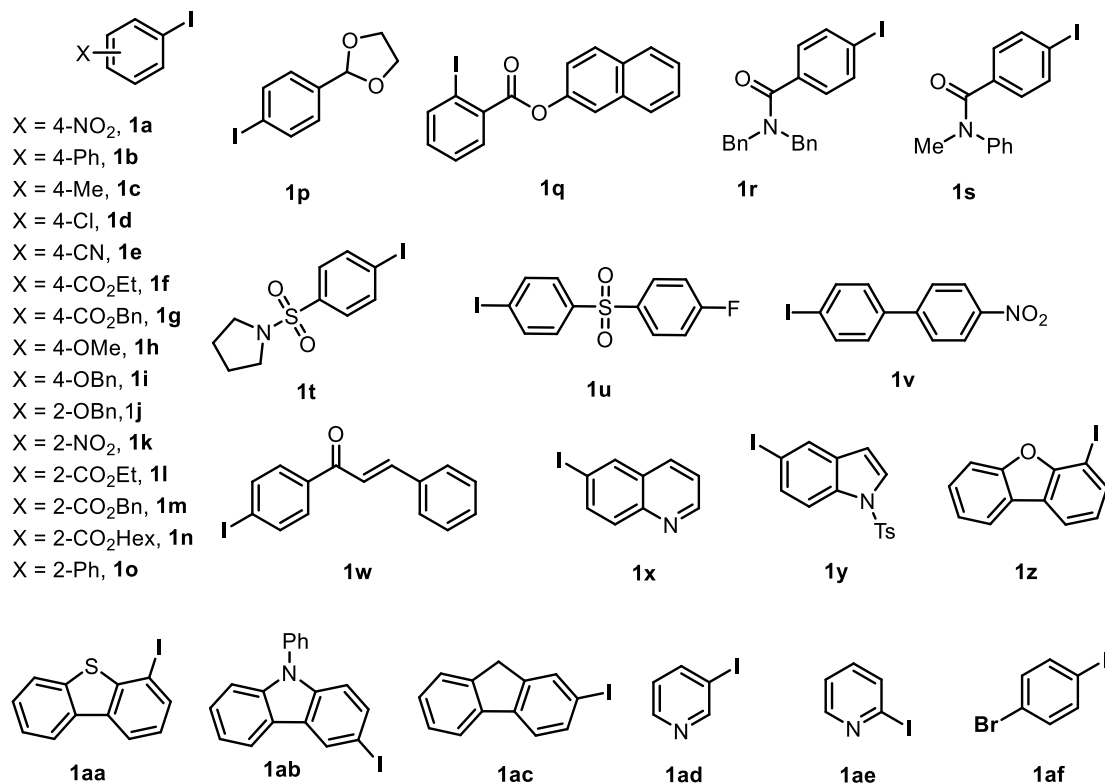

Note: Substrates **1a-1l**, **1o**, **1v**, **1x**, **1z-1af** are commercially available. Substrates **1m**, **1n**, **1p-1u**, **1w**, **1y** can be prepared from literature procedures<sup>1-10</sup>.

### Substrates 3 (Alkenyl iodides)

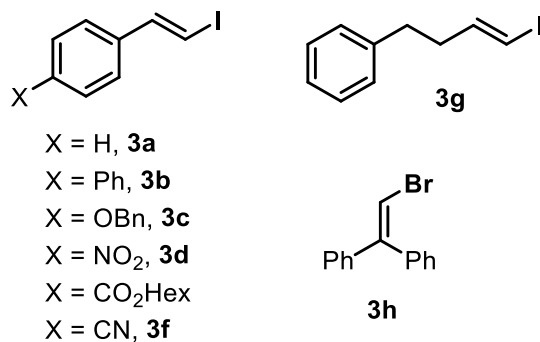

Note: Substrate **3h** is commercially available. Substrates **3a-3g** can be prepared according to general procedures.

#### IV. Experimental Procedures

##### General Procedure (I) (cf. Scheme 4) for the synthesis of alkenyl iodides (3a-3f).

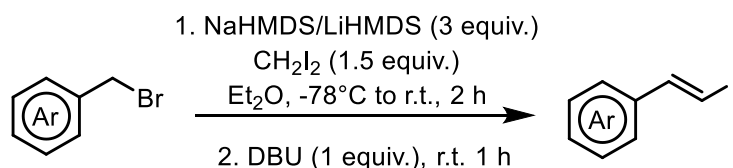

Alkenyl iodides (**3a-3f**) were synthesized according to the literature procedure<sup>11</sup>. To a solution of Et<sub>2</sub>O was added NaHMDS/LiHMDS (1.0 M solution in THF, 3.0 equiv.) dropwise at -78 °C under Argon. CH<sub>2</sub>I<sub>2</sub> (1.5 equiv.) was added dropwise at the same temperature. After 20-30 min, benzyl bromide (1.0 equiv.) was added and the reaction system was allowed to stir at -78 °C for 1-1.5h and then warm up to room temperature. DBU (1.0 equiv.) was added at room temperature and the reaction system was stirred for another 1h. When the reaction was completed (monitored by TLC), it was diluted by Et<sub>2</sub>O and filtered through a pad of Celite. The residue was dried over Na<sub>2</sub>SO<sub>4</sub> and the solvent was removed by reduced pressure. Purification on column chromatography afforded the corresponding product.

##### General Procedure (II) (cf. Scheme 4) for the synthesis of alkenyl iodide (3g).

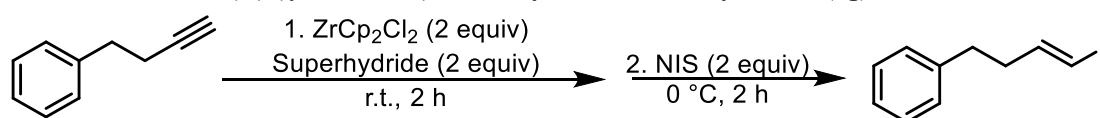

Alkenyl iodide (**3g**) was synthesized according to the literature procedure<sup>12</sup>. A round bottom flask charged with ZrCp<sub>2</sub>Cl<sub>2</sub> (1.46 g, 5 mmol) was added 5 ml THF. The superhydried solution (1.0 M in THF, 5 mmol) was added dropwise. The solution was stirred in the dark for 2 h before a solution of the but-3-yn-1-ylbenzene (325 mg, 2.5 mmol) in THF (5 ml) was added. The reaction stirred for 15 min and cooled to 0°C, then the NIS (1.13 g, 5 mmol) in 5 ml THF solution was added dropwise. The reaction mixture was stirred for 2h then quenched by NH<sub>4</sub>Cl solution. The reaction mixture was extracted with Et<sub>2</sub>O (3 × 30 ml). The combined organic layers were washed with H<sub>2</sub>O (3 × 10 ml), then brine (3 × 10 ml), dried over MgSO<sub>4</sub> and concentrated in vacuo. The residue was purified by flash column chromatography on silica gel to afford products **3g** (335 mg, 52%).

##### General Procedure (III) (cf. Scheme 5) for the synthesis of aryl iodide (5).

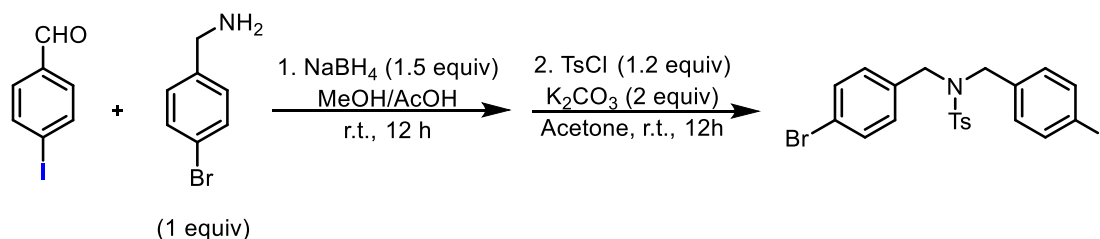

Aryl iodide (**5**) was synthesized according to the literature procedure<sup>13</sup>. A round bottom flask charged with 4-iodobenzaldehyde (1.160 g, 5 mmol) and 4-bromobenzylamine (930 mg, 5 mmol) was dissolved in MeOH/AcOH (60 ml, v / v = 99:1) solution. Sodium borohydride (285 mg, 7.5 mmol) was added to the stirring solution slowly. The reaction mixture was stirred at room temperature for 12 h then poured into NaHCO<sub>3</sub> solution. The reaction mixture was extracted with Ethyl acetate (3 × 30 ml). The combined organic layers were washed with H<sub>2</sub>O (3 × 10 ml), then brine (3 × 10 ml), dried over MgSO<sub>4</sub> and concentrated in vacuo. The obtained yellow solid was used directly without further purification. A round

bottom flask charged with 4-Toluenesulfonyl chloride (1.14 g, 6 mmol), K<sub>2</sub>CO<sub>3</sub> (828 mg, 6mmol) and previous obtained solid were dissolved in 20 ml acetone then stirred at room temperature for 12 h. The reaction mixture was extracted with Ethyl acetate (3 × 30 ml). The combined organic layers were washed with H<sub>2</sub>O (3 × 10 ml), then brine (3 × 10 ml), dried over MgSO<sub>4</sub> and concentrated in vacuo. The residue was purified by flash column chromatography (EA : Hexane = 1: 6) on silica gel to afford product **5** as white solid (675 mg, 49%).

#### General Procedure (IV) for the synthesis of Et<sub>3</sub>SiCF<sub>2</sub>CF<sub>3</sub>.

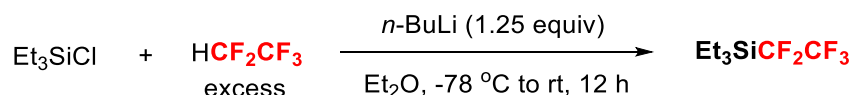

Et<sub>3</sub>SiCF<sub>2</sub>CF<sub>3</sub> was synthesized according to the literature procedure.<sup>14</sup> To a round bottom flask, 250 ml diethyl ether was cooled down to -78 °C. Pentafluoroethane was bubbled into diethyl ether for 3 hours followed by adding a solution of *n*-BuLi (100 ml, 2.5 M in hexane, 250 mmol, 1.25 equiv) carefully so that the temperature of the reaction system didn't exceed -60 °C. After stirring for 1 h, the solution of triethylchlorosilane (21.72 g, 200 mmol, 1 equiv) in diethyl ether was added within 5 min. The mixture was allowed to warm up to room temperature slowly for 12 h. The mixture was filtered through a pad of Celite and concentrated to dryness to afford the crude product. The product was purified by distillation in vacuo and obtained a colorless liquid (33.7 g, 72%). The purity of the product was determined by <sup>1</sup>H NMR and <sup>19</sup>F NMR. The spectra are in full accordance with the literature report.<sup>14</sup>

#### General procedure (V) (cf. Scheme 3&4) for copper-catalyzed pentafluoroethylation of aryl/alkenyl iodides

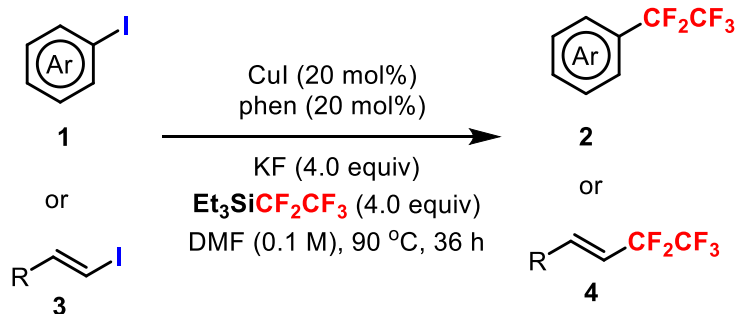

To an oven-dried glass tube equipped with a stir bar was added aryl iodide **1** or **3** (0.2 mmol, if it was a solid substrate), CuI (7.6 mg, 0.04 mmol), 1,10-Phenanthroline (7.2 mg, 0.04 mmol) and Potassium fluoride (46.4 mg, 0.8 mmol) in the glovebox. The reaction vial was sealed with a rubber septum and removed from the glovebox. Pentafluoroethyl triethylsilane (187.4 mg, 0.8 mmol), iodide **1** or **3** (if it was a liquid substrate) and DMF (2.0 ml) was then added to the vial through the syringe under argon. The resulting mixture was stirred at 90°C for 36 hours. After cooling to room temperature, the crude sample was analyzed by <sup>19</sup>F NMR using benzotrifluoride (12 μL, 0.1 mmol) as internal standard. The reaction mixture was extracted with CH<sub>2</sub>Cl<sub>2</sub> (3 × 10 ml). The combined organic layers were washed with H<sub>2</sub>O (2 × 10 ml), then brine (2 × 10 ml), dried over MgSO<sub>4</sub> and concentrated in vacuo. The residue was purified by flash column chromatography on silica gel to afford products **2** or **4**.

#### 4 mmol scale synthesis of 2b:

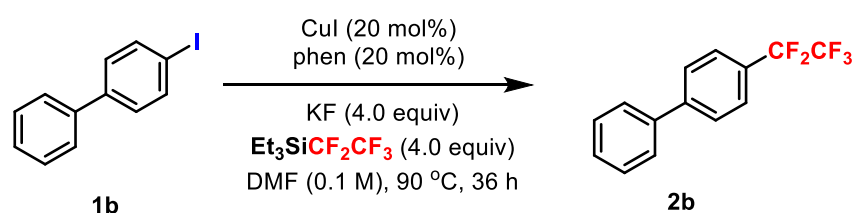

To an oven-dried round bottom flask equipped with a stir bar was added aryl iodide **1b** (1.12 g, 4.0 mmol),  $\text{CuI}$  (152.0 mg, 0.8 mmol), 1,10-Phenanthroline (144.0 mg, 0.8 mmol) and Potassium fluoride (928.0 mg, 16 mmol) in the glovebox. The reaction vial was sealed with a rubber septum and removed from the glovebox. Pentafluoroethyl triethylsilane (3.748 g, 16 mmol) and  $\text{DMF}$  (40.0 ml) was then added to the vial through the syringe under argon. The resulting mixture was stirred at  $90^\circ\text{C}$  for 36 hours. After cooling to room temperature, the crude sample was analyzed by  $^{19}\text{F}$  NMR using benzotrifluoride (12  $\mu\text{L}$ , 0.1 mmol) as internal standard. The reaction mixture was extracted with  $\text{CH}_2\text{Cl}_2$  ( $3 \times 30$  ml). The combined organic layers were washed with  $\text{H}_2\text{O}$  ( $2 \times 30$  ml), then brine ( $2 \times 30$  ml), dried over  $\text{MgSO}_4$  and concentrated in vacuo. The residue was purified by flash column chromatography on silica gel to afford product **2b** (990.8 mg, 91%).

#### 1 mmol scale synthesis of 2ab:

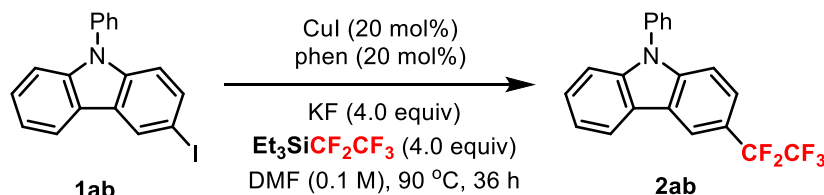

To an oven-dried round bottom flask equipped with a stir bar was added aryl iodide **1ab** (369.2 mg, 1.0 mmol),  $\text{CuI}$  (38.0 mg, 0.2 mmol), 1,10-Phenanthroline (36.0 mg, 0.2 mmol) and Potassium fluoride (232.0 mg, 4.0 mmol) in the glovebox. The reaction vial was sealed with a rubber septum and removed from the glovebox. Pentafluoroethyl triethylsilane (937.0 mg, 4.0 mmol) and  $\text{DMF}$  (10.0 ml) was then added to the vial through the syringe under argon. The resulting mixture was stirred at  $90^\circ\text{C}$  for 36 hours. After cooling to room temperature, the crude sample was analyzed by  $^{19}\text{F}$  NMR using benzotrifluoride (12  $\mu\text{L}$ , 0.1 mmol) as internal standard. The reaction mixture was extracted with  $\text{CH}_2\text{Cl}_2$  ( $3 \times 30$  ml). The combined organic layers were washed with  $\text{H}_2\text{O}$  ( $2 \times 30$  ml), then brine ( $2 \times 30$  ml), dried over  $\text{MgSO}_4$  and concentrated in vacuo. The residue was purified by flash column chromatography on silica gel to afford product **2ab** (346.5 mg, 96%).

#### 3 mmol scale synthesis of 4g:

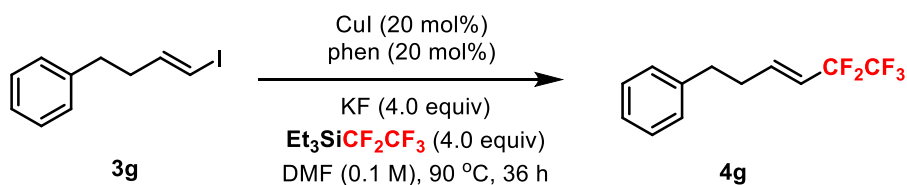

To an oven-dried round bottom flask equipped with a stir bar was added aryl iodide **3g** (774 mg, 3.0 mmol),  $\text{CuI}$  (114.0 mg, 0.6 mmol), 1,10-Phenanthroline (108.0 mg, 0.6 mmol) and Potassium fluoride (696.0 mg, 12.0 mmol) in the glovebox. The reaction vial was sealed with a rubber septum and removed

from the glovebox. Pentafluoroethyl triethylsilane (2.811 g, 12.0 mmol) and DMF (30.0 ml) was then added to the vial through the syringe under argon. The resulting mixture was stirred at 90 °C for 36 hours. After cooling to room temperature, the crude sample was analyzed by <sup>19</sup>F NMR using benzotrifluoride (12 μL, 0.1 mmol) as internal standard. The reaction mixture was extracted with CH<sub>2</sub>Cl<sub>2</sub> (3 × 30 ml). The combined organic layers were washed with H<sub>2</sub>O (2 × 30 ml), then brine (2 × 30 ml), dried over MgSO<sub>4</sub> and concentrated in vacuo. The residue was purified by flash column chromatography on silica gel to afford product **4g** (525.0 mg, 70%).

### Suzuki Reaction (cf. Scheme 5)

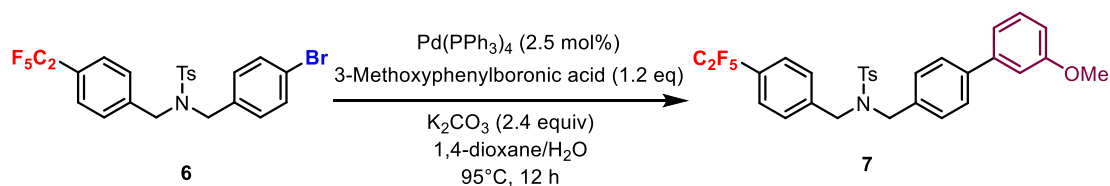

To an oven-dried glass tube equipped with a stir bar was added Pd(PPh<sub>3</sub>)<sub>4</sub> (4.2 mg, 0.00365 mmol), 3-methoxyphenylboronic acid (26.6 mg, 0.175 mmol) and K<sub>2</sub>CO<sub>3</sub> (48.3 mg, 0.350 mmol). The tube was sealed with a septum, evacuated and refilled with argon three times. A solution of **6** and **6'** (80.0 mg, 0.146 mmol) in 0.6 mL dioxane and 120 μL H<sub>2</sub>O was added under argon through syringe. The resulting mixture was heated at 95 °C with stirring in an oil bath for 12 h. After cooling to room temperature, the reaction mixture was extracted with CH<sub>2</sub>Cl<sub>2</sub> (3 × 10 mL). The combined organic layers were washed with H<sub>2</sub>O (2 × 10 mL), then brine (2 × 10 mL), dried over MgSO<sub>4</sub> and concentrated in vacuo. The residue was purified by flash column chromatography on silica gel to afford product **7** as a white solid (62.8 mg, 72% yield).

### General procedure (VI) (cf. Scheme 7) for photocatalyzed hydrodefluorination reaction of **2**

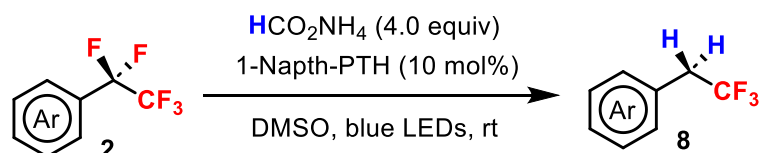

To an oven-dried glass tube equipped with a stir bar was added pentafluoroethyl benzene **2** (0.2 mmol, if it was a solid substrate), Ammonium formate (50.4mg, 0.8 mmol) and 1-Naph-PTH (7.5 mg, 0.02 mmol). Then the tube was sealed with a septum, evacuated and refilled with argon three times, pentafluoroethyl benzene **2** (0.2 mmol, if it was a liquid substrate) and DMSO (1.0 mL) was added through syringe under argon. The mixture was exposed to a blue LED (Aijiadian, 440-450 nm, λ<sub>d</sub> = 444.9 nm, λ<sub>p</sub> = 437.9 nm, 99.3% purity) and stirred at room temperature for 12 hours. After completion of the reaction, the reaction mixture was extracted with CH<sub>2</sub>Cl<sub>2</sub> (3 × 10 ml). The combined organic layers were washed with H<sub>2</sub>O (2 × 10 ml), then brine (2 × 10 ml), dried over MgSO<sub>4</sub> and concentrated in vacuo. The residue was purified by flash column chromatography on silica gel to afford products **8**.

Figure 1. Photocatalyzed hydrodefluorination reaction equipment set up

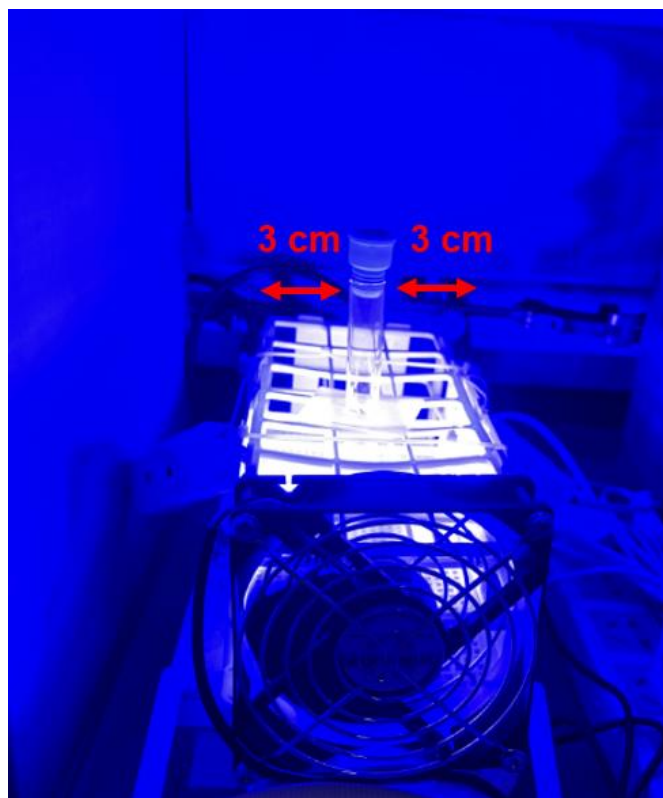



## V. Optimization Tables

**Table 1. Reaction condition optimization using 4-substituted iodobenzene**

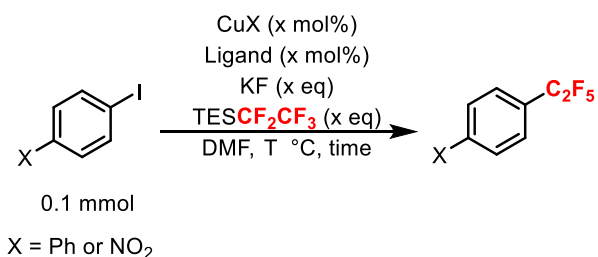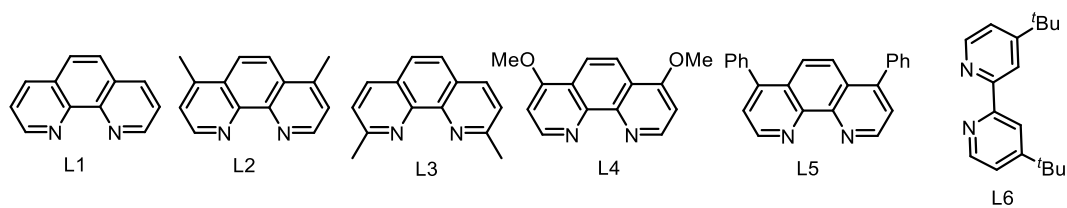

|    | Substrate | CuX                              | Ligand         | TESC <sub>2</sub> F <sub>5</sub> | F source                     | T / °C | Time/ h | Yield <sup>a</sup> |
|----|-----------|----------------------------------|----------------|----------------------------------|------------------------------|--------|---------|--------------------|
| 1  | X = Ph    | CuI (10 mol%)                    | L1 (10 mol%)   | 2 equiv                          | KF (2 equiv)                 | 60     | 24      | 31%                |
| 2  | X = Ph    | CuCl (10 mol%)                   | L1 (10 mol%)   | 2 equiv                          | KF (2 equiv)                 | 60     | 24      | 30%                |
| 3  | X = Ph    | CuOAc (10mol%)                   | L1 (10 mol%)   | 2 equiv                          | KF (2 equiv)                 | 60     | 24      | 0%                 |
| 4  | X = Ph    | CuI (10 mol%)                    | L2 (10 mol%)   | 2 equiv                          | KF (2 equiv)                 | 60     | 24      | 80%                |
| 5  | X = Ph    | CuI (10 mol%)                    | L3 (10 mol%)   | 2 equiv                          | KF (2 equiv)                 | 60     | 24      | 7%                 |
| 6  | X = Ph    | CuI (10 mol%)                    | L4 (10 mol%)   | 2 equiv                          | KF (2 equiv)                 | 60     | 24      | 87%                |
| 7  | X = Ph    | CuI (10 mol%)                    | L5 (10 mol%)   | 2 equiv                          | KF (2 equiv)                 | 60     | 24      | 64%                |
| 8  | X = Ph    | CuI (10 mol%)                    | L6 (10 mol%)   | 2 equiv                          | KF (2 equiv)                 | 60     | 24      | 30%                |
| 9  | X = Ph    | CuI (10 mol%)                    | BINAP(10 mol%) | 2 equiv                          | KF (2 equiv)                 | 60     | 24      | 15%                |
| 10 | X = Ph    | CuI (5 mol%)                     | L4 (10 mol%)   | 2 equiv                          | KF (2 equiv)                 | 60     | 24      | 87%                |
| 11 | X = Ph    | CuI (10 mol%)                    | \              | 2 equiv                          | KF (2 equiv)                 | 60     | 24      | 15%                |
| 12 | X = Ph    | Phen-Cu-I (10 mol%) <sup>b</sup> | \              | 2 equiv                          | KF (2 equiv)                 | 60     | 24      | 61%                |
| 13 | X = Ph    | CuI (10 mol%)                    | L4 (10 mol%)   | 1 equiv                          | KF (1 equiv)                 | 60     | 24      | 37%                |
| 14 | X = Ph    | CuI (10 mol%)                    | L4 (10 mol%)   | 2.5 equiv                        | KF (2.5 equiv)               | 60     | 24      | 55%                |
| 15 | X = Ph    | CuI (10 mol%)                    | L4 (10 mol%)   | 3 equiv                          | KF (3 equiv)                 | 60     | 24      | 19%                |
| 16 | X = Ph    | CuI (10 mol%)                    | L4 (10 mol%)   | 2 equiv                          | KF (1 equiv)                 | 60     | 24      | 50%                |
| 17 | X = Ph    | CuI (10 mol%)                    | L4 (10 mol%)   | 2 equiv                          | KF (4 equiv)                 | 60     | 24      | 55%                |
| 16 | X = Ph    | CuCl (10 mol%)                   | L4 (10 mol%)   | 2 equiv                          | KF (2 equiv)                 | 60     | 24      | 70%                |
| 17 | X = Ph    | CuI (10 mol%)                    | L4(10 mol%)    | 2 equiv                          | KF (2 equiv)                 | 75     | 24      | 99%                |
| 18 | X = Ph    | CuI (10 mol%)                    | L4 (10 mol%)   | 2 equiv                          | KF (2 equiv)                 | 90     | 24      | 96%                |
| 19 | X = Ph    | CuI (10 mol%)                    | L4 (10 mol%)   | 2 equiv                          | KF (2 equiv)                 | r.t.   | 24      | 33%                |
| 20 | X = Ph    | CuI (5 mol%)                     | L4 (5 mol%)    | 2 equiv                          | KF (2 equiv)                 | 75     | 24      | 18%                |
| 21 | X = Ph    | CuI (2.5 mol%)                   | L4 (2.5 mol%)  | 2 equiv                          | KF (2 equiv)                 | 75     | 24      | 23%                |
| 22 | X = Ph    | CuI (1 mol%)                     | L4 (1 mol%)    | 2 equiv                          | KF (2 equiv)                 | 75     | 24      | 4%                 |
| 23 | X = Ph    | CuI (10 mol%)                    | L4 (10 mol%)   | 2 equiv                          | \                            | 75     | 24      | 4%                 |
| 24 | X = Ph    | CuI (10 mol%)                    | L4 (10 mol%)   | 2 equiv                          | K <sup>t</sup> OBu (2 equiv) | 75     | 24      | 4%                 |

|    |                     |                                 |                            |         |                                          |    |    |                        |
|----|---------------------|---------------------------------|----------------------------|---------|------------------------------------------|----|----|------------------------|
| 25 | X = Ph              | CuI (10 mol%)                   | L4 (10 mol%)               | 2 equiv | KOAc(2 equiv)                            | 75 | 24 | 12%                    |
| 26 | X = Ph              | CuI (10 mol%)                   | L4 (10 mol%)               | 2 equiv | K <sub>3</sub> PO <sub>4</sub> (2 equiv) | 75 | 24 | 29%                    |
| 27 | X = Ph              | CuI (10 mol%)                   | L4 (10 mol%)               | 2 equiv | Li <sup>t</sup> OBu(2 equiv)             | 75 | 24 | 14%                    |
| 28 | X = Ph              | CuI (10 mol%)                   | L4 (10 mol%)               | 2 equiv | AgF(2 equiv)                             | 75 | 24 | 19%                    |
| 29 | X = Ph              | CuI (10 mol%)                   | L4 (10 mol%)               | 2 equiv | FeF <sub>3</sub> (2equiv)                | 75 | 24 | 0%                     |
| 30 | X = Ph              | CuI (10 mol%)                   | L4 (10 mol%)               | 2 equiv | KF (2 equiv)                             | 90 | 36 | >99%(85%) <sup>c</sup> |
| 31 | X = NO <sub>2</sub> | CuI (10 mol%)                   | L1 (10 mol%)               | 2 equiv | KF (2 equiv)                             | 90 | 36 | 47%                    |
| 32 | X = NO <sub>2</sub> | CuI (10 mol%)                   | L2 (10 mol%)               | 2 equiv | KF (2 equiv)                             | 90 | 36 | 39%                    |
| 33 | X = NO <sub>2</sub> | CuI (10 mol%)                   | L4 (10 mol%)               | 2 equiv | KF (2 equiv)                             | 90 | 36 | 40%                    |
| 34 | X = NO <sub>2</sub> | CuI (10 mol%)                   | L5 (10 mol%)               | 2 equiv | KF (2 equiv)                             | 90 | 36 | 27%                    |
| 35 | X = NO <sub>2</sub> | CuI (10 mol%)                   | L6 (10 mol%)               | 2 equiv | KF (2 equiv)                             | 90 | 36 | 20%                    |
| 36 | X = NO <sub>2</sub> | CuI (10 mol%)                   | PCy <sub>3</sub> (10 mol%) | 2 equiv | KF (2 equiv)                             | 90 | 36 | 18%                    |
| 37 | X = NO <sub>2</sub> | CuI (10 mol%)                   | Xantphos (10 mol%)         | 2 equiv | KF (2 equiv)                             | 90 | 36 | 13%                    |
| 38 | X = NO <sub>2</sub> | CuCl (10 mol%)                  | IPr (10 mol%)              | 2 equiv | KF (2 equiv)                             | 90 | 36 | 0%                     |
| 39 | X = NO <sub>2</sub> | CuCl (10 mol%)                  | IMes (10 mol%)             | 2 equiv | KF (2 equiv)                             | 90 | 36 | 0%                     |
| 40 | X = NO <sub>2</sub> | CuCl (10 mol%)                  | SIMes (10 mol%)            | 2 equiv | KF (2 equiv)                             | 90 | 36 | 11%                    |
| 41 | X = NO <sub>2</sub> | CuCl (10 mol%)                  | L1 (10 mol%)               | 2 equiv | KF (2 equiv)                             | 90 | 36 | 38%                    |
| 42 | X = NO <sub>2</sub> | CuCl (10 mol%)                  | L5 (10 mol%)               | 2 equiv | KF (2 equiv)                             | 90 | 36 | 38%                    |
| 43 | X = NO <sub>2</sub> | CuI (10 mol%)                   | L4 (10 mol%)               | 2 equiv | KF (2 equiv)                             | 60 | 36 | 23%                    |
| 44 | X = NO <sub>2</sub> | CuI (20 mol%)                   | L4 (20 mol%)               | 2 equiv | KF (2 equiv)                             | 90 | 36 | 50%                    |
| 45 | X = NO <sub>2</sub> | CuI (20 mol%)                   | L1 (20 mol%)               | 2 equiv | KF (2 equiv)                             | 90 | 36 | 69%                    |
| 46 | X = NO <sub>2</sub> | CuI (20 mol%)                   | L1 (40 mol%)               | 2 equiv | KF (2 equiv)                             | 90 | 36 | 44%                    |
| 47 | X = NO <sub>2</sub> | CuI (20 mol%)                   | L1 (20 mol%)               | 4 equiv | KF (4 equiv)                             | 90 | 36 | 81%                    |
| 48 | X = NO <sub>2</sub> | Phen-Cu-I (10mol%) <sup>b</sup> | \                          | 2 equiv | KF (2 equiv)                             | 90 | 36 | 35%                    |

<sup>a</sup> Unless specified otherwise, reactions were carried out in DMF (0.1 M). The product yield was determined by <sup>19</sup>F NMR using benzotrifluoride as an internal standard. <sup>b</sup>Phen-Cu-I was synthesized according to literature report and used directly without characterization. <sup>c</sup>isolated yield in bracket.

**Table2. Reaction condition optimization for photocatalyzed hydrodefluorination of 2f**

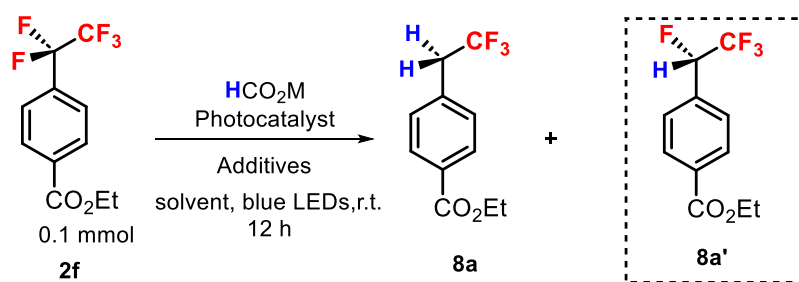

| Entry <sup>a</sup> | HCO <sub>2</sub> M                             | Photocatalyst                                                  | Additives    | Solvent            | Time / h  | 8a <sup>a</sup> | 8a'      |
|--------------------|------------------------------------------------|----------------------------------------------------------------|--------------|--------------------|-----------|-----------------|----------|
| 1                  | HCO <sub>2</sub> Cs (4 equiv)                  | 10 mol% PTH                                                    | 10 mol% CySH | DMSO               | 12        | 35%             | 44%      |
| 2                  | HCO <sub>2</sub> Cs (4 equiv)                  | 10 mol% 1-Naph-PTH                                             | 10 mol% CySH | DMSO               | 12        | 51%             | 15%      |
| 3                  | HCO <sub>2</sub> Na (4 equiv)                  | 10 mol% 1-Naph-PTH                                             | 10 mol% CySH | DMSO               | 12        | 42%             | 14%      |
| 4                  | HCO <sub>2</sub> K (4 equiv)                   | 10 mol% 1-Naph-PTH                                             | 10 mol% CySH | DMSO               | 12        | 41%             | 34%      |
| 5                  | HCO <sub>2</sub> NH <sub>4</sub> (4 equiv)     | 10 mol% 1-Naph-PTH                                             | 10 mol% CySH | DMSO               | 12        | 99%             | 0        |
| 6                  | HCO <sub>2</sub> NH <sub>4</sub> (3 equiv)     | 10 mol% 1-Naph-PTH                                             | 10 mol% CySH | DMSO               | 12        | 55%             | 8%       |
| 7                  | HCO <sub>2</sub> NH <sub>4</sub> (2 equiv)     | 10 mol% 1-Naph-PTH                                             | 10 mol% CySH | DMSO               | 12        | 79%             | 1%       |
| <b>8</b>           | <b>HCO<sub>2</sub>NH<sub>4</sub> (4 equiv)</b> | <b>10 mol% 1-Naph-PTH</b>                                      | <b>\</b>     | <b>DMSO</b>        | <b>12</b> | <b>99%</b>      | <b>0</b> |
| 9                  | HCO <sub>2</sub> NH <sub>4</sub> (4 equiv)     | 5 mol% 1-Naph-PTH                                              | \            | DMSO               | 12        | 70%             | 12%      |
| 10                 | HCO <sub>2</sub> NH <sub>4</sub> (4 equiv)     | 2 mol% 1-Naph-PTH                                              | \            | DMSO               | 12        | 0               | 0        |
| 11                 | HCO <sub>2</sub> NH <sub>4</sub> (4 equiv)     | 5 mol% 4-CZIPN                                                 | \            | DMSO               | 12        | 0               | 56%      |
| 12                 | HCO <sub>2</sub> NH <sub>4</sub> (8 equiv)     | 5 mol% 4-CZIPN                                                 | \            | DMSO               | 36        | 55%             | 44%      |
| 13                 | HCO <sub>2</sub> NH <sub>4</sub> (4 equiv)     | 5 mol% 3DPAFINPN                                               | \            | DMSO               | 12        | 60%             | 36%      |
| 14                 | HCO <sub>2</sub> NH <sub>4</sub> (4 equiv)     | 5 mol% 3DPA2FIBN                                               | \            | DMSO               | 12        | 99%             | 0        |
| 15                 | HCO <sub>2</sub> NH <sub>4</sub> (4 equiv)     | 5 mol% Acridinium BF <sub>4</sub>                              | \            | DMSO               | 12        | 0               | 0        |
| 16                 | HCO <sub>2</sub> NH <sub>4</sub> (4 equiv)     | 5 mol% Ru(bpy) <sub>3</sub> Cl <sub>2</sub> ·6H <sub>2</sub> O | \            | DMSO               | 12        | 0               | 0        |
| 17 <sup>b</sup>    | HCO <sub>2</sub> NH <sub>4</sub> (4 equiv)     | 10 mol% 1-Naph-PTH                                             | \            | DMSO               | 12        | 0               | 0        |
| 18                 | HCO <sub>2</sub> NH <sub>4</sub> (4 equiv)     | \                                                              | \            | DMSO               | 12        | 0               | 15%      |
| 19 <sup>c</sup>    | HCO <sub>2</sub> NH <sub>4</sub> (4 equiv)     | 10 mol% 1-Naph-PTH                                             | \            | DMSO               | 12        | 0               | 0        |
| 20                 | HCO <sub>2</sub> NH <sub>4</sub> (4 equiv)     | 10 mol% 1-Naph-PTH                                             | \            | EA                 | 12        | 0               | 0        |
| 21                 | HCO <sub>2</sub> NH <sub>4</sub> (4 equiv)     | 10 mol% 1-Naph-PTH                                             | \            | CH <sub>3</sub> CN | 12        | 0               | 34%      |
| 22                 | HCO <sub>2</sub> NH <sub>4</sub> (4 equiv)     | 10 mol% 1-Naph-PTH                                             | \            | Toluene            | 12        | 0               | 4%       |
| 23                 | HCO <sub>2</sub> NH <sub>4</sub> (4 equiv)     | 10 mol% 1-Naph-PTH                                             | \            | DMF                | 12        | 0               | 0        |
| 24                 | HCO <sub>2</sub> NH <sub>4</sub> (4 equiv)     | 10 mol% 1-Naph-PTH                                             | \            | THF                | 12        | 0               | 0        |
| 25                 | HCO <sub>2</sub> NH <sub>4</sub> (4 equiv)     | 10 mol% 1-Naph-PTH                                             | \            | Acetone            | 12        | 0               | 11%      |

**a:** Reactions were under argon, yields are determined by <sup>19</sup>F NMR with PhCF<sub>3</sub> as an internal standard; **b:** without blue LED; **c:** In sealed tube (air).

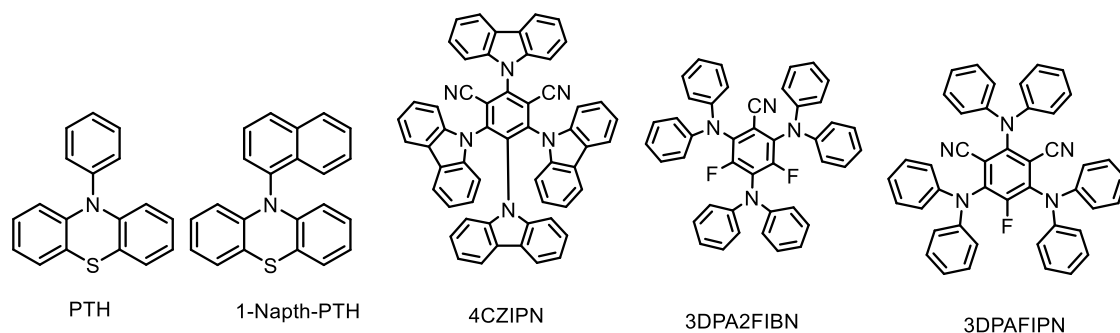

## General procedure for synthesis of 8a' in 0.2 mmol scale

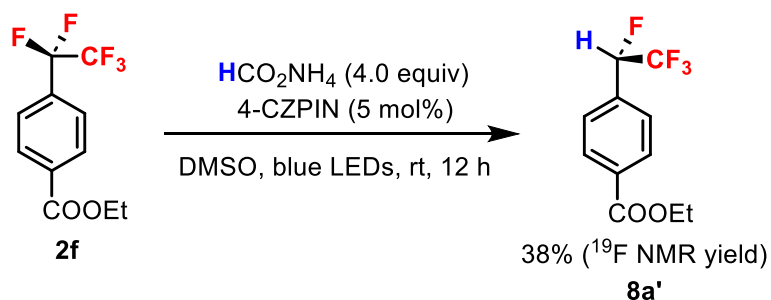

To an oven-dried glass tube equipped with a stir bar was charged with ammonium formate (50.4 mg, 0.8 mmol) and 4-CZIPIN (7.9 mg, 0.01 mmol). Then the tube was sealed with a septum, evacuated and refilled with argon three times, pentafluoroethyl benzene **2f** (53.6 mg, 0.2 mmol) and DMSO (2.0 mL) was added through syringe under argon. The mixture was exposed to a blue LED and stirred at room temperature for 12 hours. After completion of the reaction, the reaction mixture was analyzed by  $^{19}\text{F}$  NMR with using benzotrifluoride as an internal standard and got 38% crude  $^{19}\text{F}$  NMR yield. The reaction mixture was subjected to GC-MS analysis.

### Crude $^{19}\text{F}$ NMR spectrum of the reaction with benzotrifluoride as an internal standard

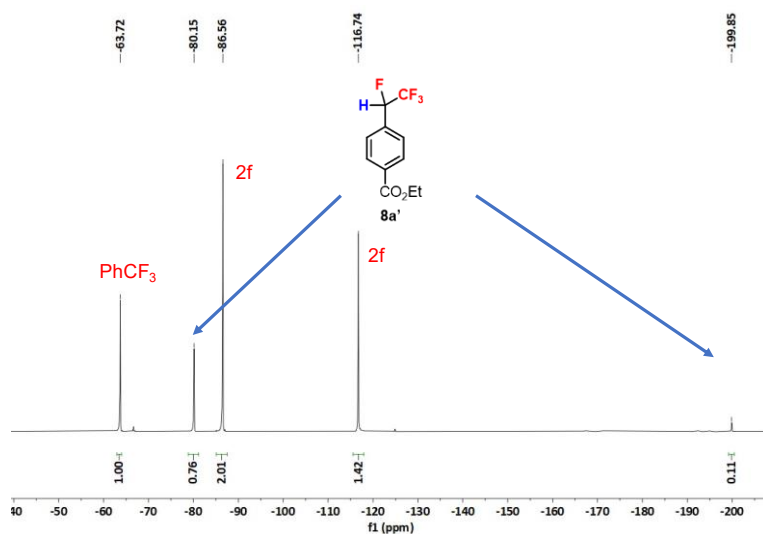

### $^{19}\text{F}$ NMR chemical shift

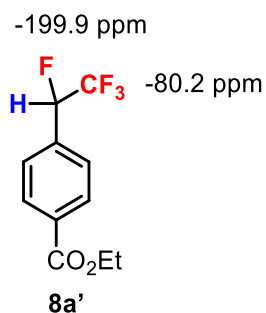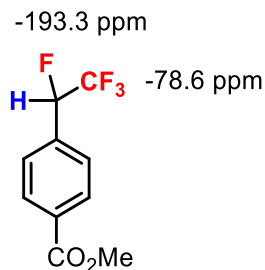

Organic letters, 2014, 16(22): 6004-6007.

# GC-MS analysis of the reaction mixture.

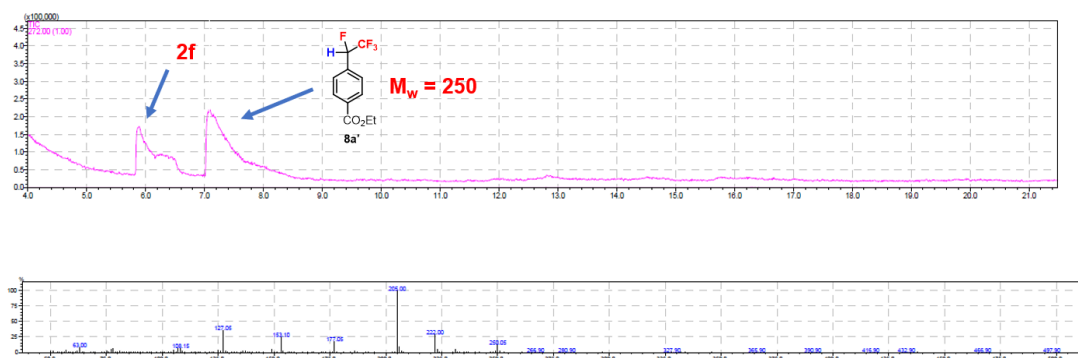

## VI. Proposed catalytic cycle

**Scheme 1. Proposed catalytic cycle for Copper-Catalyzed Pentafluoroethylation of Aryl/Alkenyl Iodides**

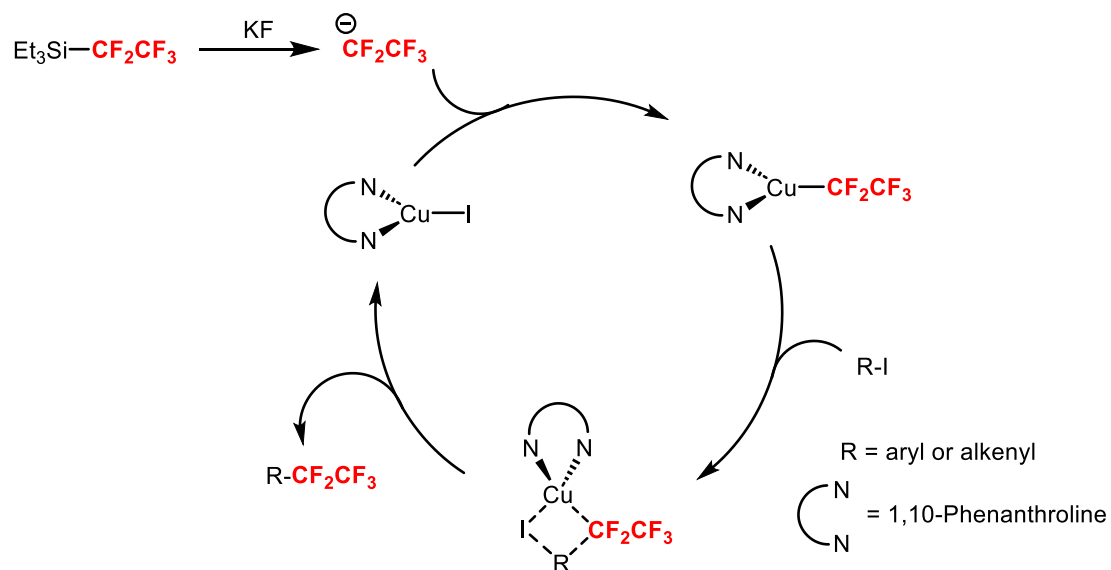

## VII. Reference

1. Zuo, Y.; Zhu, S.; Liu, Y.; Zhao, J.; Zhang, S.; Zhong, C. Quantitative Methylation of Lignin Monomers Using Tetrabutylammonium Hydroxide and MeI and Applications in Organic Synthesis. *ACS omega*, **2023**, *8*, 7057-7062.
2. Zhang, Y.; Han, J.; Xu, Y.; Wei, Y. 2-Iodoxybenzoic acid-mediated transformation of halogenated hydrocarbon in the presence of tetraethyl ammonium bromide. *J. Chem. Res.* **2012**, *36*, 303-307.
3. Knauber, T.; Arikan, F.; Roschenthaler, G. V.; Goossen, L. J. Copper-catalyzed trifluoromethylation of aryl iodides with potassium (trifluoromethyl)trimethoxyborate. *Chem. - Eur. J.* **2011**, *17*, 2689-2697.
4. Larock, R. C.; Doty, M. J.; Han, X. Synthesis of Isocoumarins and  $\alpha$ -Pyrone via Palladium-Catalyzed Annulation of Internal Alkynes. *J. Org. Chem.* **1999**, *64*, 8770-8779.
5. Ye, P.; Shao, Y.; Ye, X.; Zhang, F.; Li, R.; Sun, J.; Xu, B.; Chen, J. Homoleptic Bis(trimethylsilyl)amides of Yttrium Complexes Catalyzed Hydroboration Reduction of Amides to Amines. *Org. Lett.* **2020**, *22*, 1306-1310.
6. Zhang, Z.; Liu, Y.-H.; Zhang, X.; Wang, X.-C. KMnO<sub>4</sub>-Mediated Oxidative C-N Bond Cleavage of Tertiary Amines: Synthesis of Amides and Sulfonamides. *Tetrahedron*, **2019**, *75*, 2763-2770.
7. Jiang, H.; Tang, X.; Xu, Z.; Wang, H.; Han, K.; Yang, X.; Zhou, Y.; Feng, Y.-L.; Yu, X.-Y.; Gui, Q. TBAI-catalyzed selective synthesis of sulfonamides and  $\beta$ -aryl sulfonyl enamines: coupling of arenesulfonyl chlorides and sodium sulfinates with tert-amines. *Org. Biomol. Chem.* **2019**, *17*, 2715-2720.
8. Mao, Z.; Yang, Z.; Mu, Y.; Zhang, Y.; Wang, Y. F.; Chi, Z.; Lo, C. C.; Liu, S.; Lien, A.; Xu, J. Linearly Tunable Emission Colors Obtained from a Fluorescent-Phosphorescent Dual-Emission Compound by Mechanical Stimuli. *Angew. Chem., Int. Ed.* **2015**, *54*, 6270-6273.
9. Ono, M.; Hori, M.; Haratake, M.; Tomiyama, T.; Mori, H.; Nakayama, M. Structure-Activity Relationship of Chalcones and Related Derivatives as Ligands for Detecting of  $\beta$ -Amyloid Plaques in the Brain. *Bioorg. Med. Chem.* **2007**, *15*, 6388-6396.
10. Denmark, S. E.; Kobayashi, T. Tandem Intramolecular Silylformylation and Silicon-Assisted Cross-Coupling Reactions. Synthesis of Geometrically Defined  $\alpha,\beta$ -Unsaturated Aldehydes. *J. Org. Chem.* **2003**, *68*, 5153-5159.
11. Lu, X.-L.; Shannon, M.; Peng, X.-S.; Wong, H. N.-C. Stereospecific Iron-Catalyzed Carbon (sp<sup>2</sup>)-Carbon (sp<sup>3</sup>) Cross-Coupling with Alkylolithium and Alkenyl Iodides. *Org. Lett.* **2019**, *21*, 2546-2549.
12. Gerelle, M.; Dalencon, A. J.; Willis, M. C.; Palladium-catalyzed direct functionalization of benzoxazoles with alkenyl iodides. *Tetra Lett*, **2012**, *53*, 1954-1957.
13. Illescas, B. M.; Santos, J.; Diaz, M. C.; Martin, N.; Atienza, C. M.; Guldi, D. M. Supramolecular Threaded Complexes from Fullerene - Crown Ether and  $\pi$  - Extended TTF Derivatives. *Eur. J. Org. Chem.* **2007**, 5027-5037.
14. Katayev, D.; Vaclavik, J.; Bruning, F.; Commare, B.; Togni, A. Synthesis of quaternary  $\alpha$ -perfluoroalkyl lactams via electrophilic perfluoroalkylation. *Chem. Commun.* **2016**, *52*, 4049-4052.
15. Xie, Q.; Li, L.; Zhu, Z.; Zhang, R.; Ni, C.; Hu, J. From C1 to C2: TMSCF<sub>3</sub> as a Precursor for Pentafluoroethylation. *Angew. Chem., Int. Ed.* **2018**, *57*, 13211-13215.
16. Popov, I.; Lindeman, S.; Daugulis, O. Copper-Catalyzed Arylation of 1H-Perfluoroalkanes. *J. Am. Chem. Soc.* **2011**, *133*, 9286-9289.
17. Ferguson, D. M.; Bour, J. R.; Canty, A. J.; Kampf, J. W.; Sanford, M. S. Stoichiometric and Catalytic Aryl-Perfluoroalkyl Coupling at Tri-tert-butylphosphine Palladium(II) Complexes. *J. Am. Chem. Soc.* **2017**, *139*, 11662-11665.

18. Serizawa, H.; Aikawa, K.; Mikami, K. Direct Synthesis of Pentafluoroethyl Copper from Pentafluoropropionate as an Economical C<sub>2</sub>F<sub>5</sub> Source: Application to Pentafluoroethylation of Arylboronic Acids and Aryl Bromides. *Org. Lett.* **2014**, *16*, 3456–3459.
19. Huang, Y. J.; Ajitha, M. J.; Huang, K. W.; Zhang, Z. X.; Weng, Z. Q. A class of effective decarboxylative perfluoroalkylating reagents: [(Phen)<sub>2</sub>Cu] (O<sub>2</sub>CRF). *Dalton. Trans.* **2016**, *45*, 8468-8474.
20. Pan, S.; Xie, Q.; Wang, X.; Wang, Q.; Ni, C.; Hu, J. Copper-mediated pentafluoroethylation of organoboronates and terminal alkynes with TMSCF<sub>3</sub>. *Chem. Commun.* **2022**, *58*, 5156-5159.
21. Wu, C.; Huang, Y.; Zhang, Z.; Weng, Z. Decarboxylative Perfluoroalkylation of Vinyl Bromides with Copper(I) Perfluorocarboxylato Complexes. *Asian J. Org. Chem.* **2016**, *5*, 1406–1410
22. Li, X.; Gao, X.; He, C.-Y.; Zhang, X. Using Chlorotrifluoroethane for Trifluoroethylation of (Hetero)aryl Bromides and Chlorides via Nickel Catalysis. *Org. Lett.* **2021**, *23*, 1400-1405.
23. Li, H.; Sheng, J.; Liao, G. X.; Wu, B. B.; Ni, H. Q.; Li, Y.; Wang, X. S. Nickel-Catalyzed Direct Trifluoroethylation of Aryl Iodides with 1,1,1-Trifluoro-2-Iodoethane via Reductive Coupling. *Adv. Synth. Catal.* **2020**, *362*, 5363-5367.



## VIII. Characterization

### 4-(perfluoroethyl)-1,1'-biphenyl (**2b**)

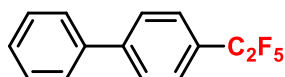

Following the general procedure **V**, reaction was run using aryl iodide **1b** (56.0 mg, 0.2 mmol), CuI (7.6 mg, 0.04 mmol), 1,10-Phenanthroline (7.2 mg, 0.04 mmol), Pentafluoroethyl triethylsilane (187.4 mg, 0.8 mmol) and Potassium fluoride (46.4 mg, 0.8 mmol) in 2 ml DMF for 36 h. The product was purified by flash column chromatography on silica gel (hexane) and obtained as a white solid (48.4 mg, 89% yield),  $R_f = 0.55$  (hexane). **<sup>1</sup>H NMR** (500 MHz, CDCl<sub>3</sub>)  $\delta$  7.72 (d,  $J = 8.2$  Hz, 2H), 7.68 (d,  $J = 8.2$  Hz, 2H), 7.61 (d,  $J = 8.0$  Hz, 2H), 7.49 (t,  $J = 7.6$  Hz, 2H), 7.45 – 7.39 (m, 1H). **<sup>19</sup>F NMR** (471 MHz, CDCl<sub>3</sub>)  $\delta$  -84.7 (s, 3F), -115.7 (s, 2F). **<sup>13</sup>C NMR** (101 MHz, CDCl<sub>3</sub>)  $\delta$  145.0 (t,  $J = 1.8$  Hz), 139.8, 129.2, 128.4, 127.6, 127.4, 127.1 (t,  $J = 6.3$  Hz), 127.6 (t,  $J = 24.3$  Hz), 119.3 (qt,  $J = 286.0, 39.5$  Hz), 115.2 (tq,  $J = 252.7, 38.2$  Hz). The spectra are in full accordance with the literature report.<sup>15</sup>

### 4-(Perfluoroethyl)benzonitrile (**2e**)

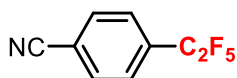

Following the general procedure **V**, reaction was run using aryl iodide **1e** (45.8 mg, 0.2 mmol), CuI (7.6 mg, 0.04 mmol), 1,10-Phenanthroline (7.2 mg, 0.04 mmol), Pentafluoroethyl triethylsilane (187.4 mg, 0.8 mmol) and Potassium fluoride (46.4 mg, 0.8 mmol) in 2 ml DMF for 36 h. The product was purified by flash column chromatography on silica gel (DCM : Hexane = 1 : 5) and obtained as a yellow liquid (34.5 mg, 78% yield),  $R_f = 0.25$  (DCM : Hexane = 1 : 5). **<sup>1</sup>H NMR** (400 MHz, CDCl<sub>3</sub>)  $\delta$  7.82 (d,  $J = 8.2$  Hz, 2H), 7.74 (d,  $J = 8.1$  Hz, 2H). **<sup>19</sup>F NMR** (471 MHz, CDCl<sub>3</sub>)  $\delta$  -85.1 (s, 3F), -116.2 (s, 2F). **<sup>13</sup>C NMR** (126 MHz, CDCl<sub>3</sub>)  $\delta$  133.0 (t,  $J = 24.2$  Hz), 132.7, 127.5 (t,  $J = 6.4$  Hz), 118.9 (qt,  $J = 284.4, 38.3$  Hz), 117.5, 116.4, 112.8 (tq,  $J = 253.3, 38.3$  Hz). The spectra are in full accordance with the literature report.

15

### ethyl 4-(perfluoroethyl)benzoate (**2f**)

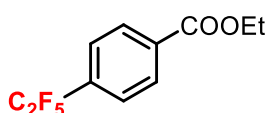

Following the general procedure **V**, reaction was run using aryl iodide **1f** (55.2 mg, 0.2 mmol), CuI (7.6 mg, 0.04 mmol), 1,10-Phenanthroline (7.2 mg, 0.04 mmol), Pentafluoroethyl triethylsilane (187.4 mg, 0.8 mmol) and Potassium fluoride (46.4 mg, 0.8 mmol) in 2 ml DMF for 36 h. The product was purified by flash column chromatography on silica gel (DCM / Hexane = 1:10) and obtained as a yellow liquid (40.7 mg, 76% yield),  $R_f = 0.2$  (DCM / Hexane = 1:10). **<sup>1</sup>H NMR** (500 MHz, CDCl<sub>3</sub>)  $\delta$  8.17 (d,  $J = 8.0$ , 2H), 7.67 (d,  $J = 8.3$  Hz, 2H), 4.41 (q,  $J = 7.1$  Hz, 2H), 1.41 (t,  $J = 7.1$  Hz, 3H). **<sup>19</sup>F NMR** (471 MHz, CDCl<sub>3</sub>)  $\delta$  -84.7 (s, 3F), -115.4 (s, 2F). **<sup>13</sup>C NMR** (126 MHz, CDCl<sub>3</sub>)  $\delta$  165.6, 134.0, 132.8 (t,  $J = 23.9$  Hz), 130.0, 126.7 (t,  $J = 6.2$  Hz), 119.1 (qt,  $J = 285.9, 38.9$  Hz), 113.2 (tq,  $J = 254.3, 38.3$  Hz), 61.7, 14.4. The spectra are in full accordance with the literature report.<sup>15</sup>

benzyl 4-(perfluoroethyl)benzoate (**2g**)

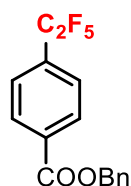

Following the general procedure **V**, reaction was run using aryl iodide **1g** (67.2 mg, 0.2 mmol), CuI (7.6 mg, 0.04 mmol), 1,10-Phenanthroline (7.2 mg, 0.04 mmol), Pentafluoroethyl triethylsilane (187.4 mg, 0.8 mmol) and Potassium fluoride (46.4 mg, 0.8 mmol) in 2 ml DMF for 36 h. The product was purified by flash column chromatography on silica gel (DCM / Hexane = 1:10) and obtained as a yellow solid (29.7 mg, 45% yield),  $R_f$  = 0.35 (DCM / Hexane = 1:5).  $^1\text{H NMR}$  (500 MHz,  $\text{CDCl}_3$ )  $\delta$  8.21 (d,  $J$  = 8.2 Hz, 2H), 7.69 (d,  $J$  = 8.3 Hz, 2H), 7.50 – 7.45 (m, 2H), 7.44 – 7.35 (m, 3H), 5.41 (s, 2H).  $^{19}\text{F NMR}$  (471 MHz,  $\text{CDCl}_3$ )  $\delta$  -84.6 (s, 3F), -115.4 (s, 2F).  $^{13}\text{C NMR}$  (126 MHz,  $\text{CDCl}_3$ )  $\delta$  165.3, 135.7, 133.7 (t,  $J$  = 2.1 Hz), 133.0 (t,  $J$  = 24.0 Hz), 130.1, 128.8, 128.6, 128.5, 126.8 (t,  $J$  = 6.3 Hz), 119.0 (qt,  $J$  = 286.1, 38.8 Hz), 113.2 (tq,  $J$  = 254.3, 38.5 Hz), 67.4. **HRMS** (ESI)  $m/z$ :  $[\text{M}+\text{Na}]^+$  Calcd for  $\text{C}_{16}\text{H}_{11}\text{F}_5\text{O}_2$  353.0571; Found 353.0567.

1-(benzyloxy)-4-(perfluoroethyl)benzene (**2i**)

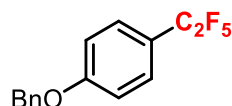

Following the general procedure **V**, reaction was run using aryl iodide **1i** (62.0 mg, 0.2 mmol), CuI (7.6 mg, 0.04 mmol), 1,10-Phenanthroline (7.2 mg, 0.04 mmol), Pentafluoroethyl triethylsilane (187.4 mg, 0.8 mmol) and Potassium fluoride (46.4 mg, 0.8 mmol) in 2 ml DMF for 36 h. The product was purified by flash column chromatography on silica gel (hexane) and obtained as a white solid (39.0 mg, 65% yield),  $R_f$  = 0.40 (hexane).  $^1\text{H NMR}$  (500 MHz,  $\text{CDCl}_3$ )  $\delta$  7.52 (d,  $J$  = 8.5 Hz, 2H), 7.47 – 7.31 (m, 5H), 7.06 (d,  $J$  = 8.5 Hz, 2H), 5.12 (s, 2H).  $^{19}\text{F NMR}$  (471 MHz,  $\text{CDCl}_3$ )  $\delta$  -84.9 (s, 3F), -113.9 (s, 2F).  $^{13}\text{C NMR}$  (101 MHz,  $\text{CDCl}_3$ )  $\delta$  161.6, 136.4, 128.9, 128.4, 128.2 (t,  $J$  = 6.3 Hz), 127.6, 121.1 (t,  $J$  = 24.6 Hz), 115.1, 119.24 (qt,  $J$  = 286.0, 40.3 Hz), 113.4 (dq,  $J$  = 253.4, 38.2 Hz), 70.4. The spectra are in full accordance with the literature report.<sup>15</sup>

1-(benzyloxy)-2-(perfluoroethyl)benzene (**2j**)

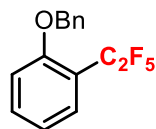

Following the general procedure **V**, reaction was run using aryl iodide **1j** (62.0 mg, 0.2 mmol), CuI (7.6 mg, 0.04 mmol), 1,10-Phenanthroline (7.2 mg, 0.04 mmol), Pentafluoroethyl triethylsilane (187.4 mg, 0.8 mmol) and Potassium fluoride (46.4 mg, 0.8 mmol) in 2 ml DMF for 36 h. The product was purified by flash column chromatography on silica gel (hexane) and obtained as a colorless liquid (51.6 mg, 85% yield),  $R_f$  = 0.40 (hexane).  $^1\text{H NMR}$  (500 MHz,  $\text{CDCl}_3$ )  $\delta$  7.57 (d,  $J$  = 7.9 Hz, 1H), 7.49 (t,  $J$  = 7.9 Hz, 1H), 7.47 – 7.38 (m, 4H), 7.37 – 7.31 (m, 1H), 7.10 – 7.04 (m, 2H), 5.17 (s, 2H).  $^{19}\text{F NMR}$  (471 MHz,  $\text{CDCl}_3$ )  $\delta$  -83.6 (s, 3F), -111.7 (s, 2F).  $^{13}\text{C NMR}$  (126 MHz,  $\text{CDCl}_3$ )  $\delta$  157.4 (t,  $J$  = 2.7 Hz), 136.5, 133.6, 129.2 (t,  $J$  = 8.5 Hz), 128.7, 128.1, 127.0, 120.7, 119.7 (qt,  $J$  = 286.9, 39.1 Hz), 117.1 (t,  $J$  = 22.6 Hz),

114.0 (tq,  $J = 254.8, 39.6$  Hz), 113.7, 70.6. **HRMS** (ESI)  $m/z$ :  $[M+Na]^+$  Calcd for  $C_{15}H_{11}F_5O$  325.0622; Found 325.0624.

ethyl 2-(perfluoroethyl)benzoate (**2l**)

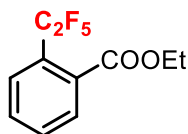

Following the general procedure **V**, reaction was run using aryl iodide **1l** (55.2 mg, 0.2 mmol), CuI (7.6 mg, 0.04 mmol), 1,10-Phenanthroline (7.2 mg, 0.04 mmol), Pentafluoroethyl triethylsilane (187.4 mg, 0.8 mmol) and Potassium fluoride (46.4 mg, 0.8 mmol) in 2 ml DMF for 36 h. The product was purified by flash column chromatography on silica gel (DCM / Hexane = 1:10) and obtained as a yellow liquid (31.1 mg, 58% yield),  $R_f = 0.2$  (DCM / Hexane = 1:10).  **$^1H$  NMR** (500 MHz,  $CDCl_3$ )  $\delta$  7.73 – 7.49 (m, 4H), 4.37 (q,  $J = 7.1$  Hz, 2H), 1.35 (t,  $J = 7.1$  Hz, 3H).  **$^{19}F$  NMR** (471 MHz,  $CDCl_3$ )  $\delta$  -83.2 (s, 3F), -108.5 (s, 2F).  **$^{13}C$  NMR** (126 MHz,  $CDCl_3$ )  $\delta$  168.0, 133.7 (t,  $J = 3.3$  Hz), 132.0, 130.3, 129.2, 128.3 (t,  $J = 7.2$  Hz), 126.0 (t,  $J = 23.5$  Hz), 119.1 (qt,  $J = 286.9, 38.7$  Hz), 113.8 (tq,  $J = 255.4, 39.1$  Hz), 62.2, 13.9. The spectra are in full accordance with the literature report.<sup>16</sup>

benzyl 2-(perfluoroethyl)benzoate (**2m**)

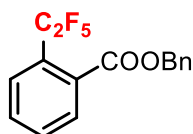

Following the general procedure **V**, reaction was run using aryl iodide **1m** (67.2 mg, 0.2 mmol), CuI (7.6 mg, 0.04 mmol), 1,10-Phenanthroline (7.2 mg, 0.04 mmol), Pentafluoroethyl triethylsilane (187.4 mg, 0.8 mmol) and Potassium fluoride (46.4 mg, 0.8 mmol) in 2 ml DMF for 36 h. The product was purified by flash column chromatography on silica gel (DCM / Hexane = 1:10) and obtained as a yellow oil (41.0 mg, 62% yield),  $R_f = 0.25$  (DCM / Hexane = 1:5).  **$^1H$  NMR** (400 MHz,  $CDCl_3$ )  $\delta$  7.69 – 7.54 (m, 4H), 7.52 – 7.34 (m, 5H), 5.38 (s, 2H).  **$^{19}F$  NMR** (471 MHz,  $CDCl_3$ )  $\delta$  -83.1 (s, 3F), -108.5 (s, 2F).  **$^{13}C$  NMR** (126 MHz,  $CDCl_3$ )  $\delta$  167.6, 135.1, 133.1 (t,  $J = 3.2$  Hz), 131.9, 130.4, 129.1, 128.7, 128.6, 128.6, 128.2 (t,  $J = 7.3$  Hz), 126.0 (t,  $J = 23.6$  Hz), 119.0 (qt,  $J = 287.0, 38.6$  Hz), 113.6 (tq,  $J = 255.6, 39.1$  Hz), 68.0. **HRMS** (ESI)  $m/z$ :  $[M+Na]^+$  Calcd for  $C_{16}H_{11}F_5O_2$  335.0571; Found 335.0571.

hexyl 2-(perfluoroethyl)benzoate (**2n**)

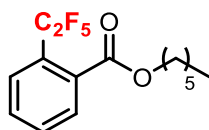

Following the general procedure **V**, reaction was run using aryl iodide **1n** (66.4 mg, 0.2 mmol), CuI (7.6 mg, 0.04 mmol), 1,10-Phenanthroline (7.2 mg, 0.04 mmol), Pentafluoroethyl triethylsilane (187.4 mg, 0.8 mmol) and Potassium fluoride (46.4 mg, 0.8 mmol) in 2 ml DMF for 36 h. The product was purified by flash column chromatography on silica gel (EA / Hexane = 1:20) and obtained as a yellow liquid (58.3 mg, 90% yield),  $R_f = 0.35$  (EA / Hexane = 1:20).  **$^1H$  NMR** (400 MHz,  $CDCl_3$ )  $\delta$  7.70 – 7.48 (m, 4H), 4.31 (t,  $J = 6.8$  Hz, 2H), 1.72 (p,  $J = 6.9$  Hz, 2H), 1.51 – 1.15 (m, 6H), 1.01 – 0.75 (m, 3H).  **$^{19}F$  NMR**

(471 MHz, CDCl<sub>3</sub>)  $\delta$  -83.2 (s, 3F), -108.6 (s, 2F). <sup>13</sup>C NMR (126 MHz, CDCl<sub>3</sub>)  $\delta$  168.1, 133.7 (t,  $J$  = 3.2 Hz), 132.0, 130.3, 129.2, 128.3 (td,  $J$  = 7.3, 1.7 Hz), 126.0 (t,  $J$  = 23.6 Hz), 119.1 (qt,  $J$  = 286.9, 38.8 Hz), 113.7 (tq,  $J$  = 255.5, 39.2 Hz), 66.5, 31.5, 28.4, 25.6, 22.6, 14.1. HRMS (ESI)  $m/z$ : [M+Na]<sup>+</sup> Calcd for C<sub>15</sub>H<sub>17</sub>F<sub>5</sub>O<sub>2</sub> 347.1041; Found 347.1037.

#### 2-(4-(perfluoroethyl)phenyl)-1,3-dioxolane (**2p**)

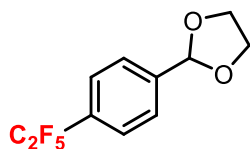

Following the general procedure **V**, reaction was run using aryl iodide **1p** (55.2 mg, 0.2 mmol), CuI (7.6 mg, 0.04 mmol), 1,10-Phenanthroline (7.2 mg, 0.04 mmol), Pentafluoroethyl triethylsilane (187.4 mg, 0.8 mmol) and Potassium fluoride (46.4 mg, 0.8 mmol) in 2 ml DMF for 36 h. The product was purified by flash column chromatography on silica gel (EA: hexane = 1:5) and obtained as a colorless oil (25.7 mg, 48% yield),  $R_f$  = 0.2 (EA: hexane = 1:5). <sup>1</sup>H NMR (500 MHz, CDCl<sub>3</sub>)  $\delta$  7.62 (s, 4H), 5.87 (s, 1H), 4.39 – 3.89 (m, 4H). <sup>19</sup>F NMR (471 MHz, CDCl<sub>3</sub>)  $\delta$  -84.7 (s, 3F), -114.9 (s, 2F). <sup>13</sup>C NMR (126 MHz, CDCl<sub>3</sub>)  $\delta$  142.2 (t,  $J$  = 1.5 Hz), 129.9, 129.5 (t,  $J$  = 24.0 Hz), 126.7 (t,  $J$  = 6.3 Hz), 119.2 (qt,  $J$  = 286.0, 39.3 Hz), 112.1 (tq,  $J$  = 254.5, 38.1 Hz), 102.9, 65.6. The spectra are in full accordance with the literature report.<sup>17</sup>

#### naphthalen-2-yl 2-(perfluoroethyl)benzoate (**2q**)

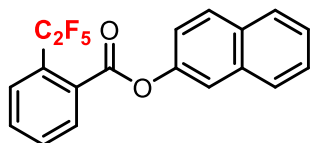

Following the general procedure **V**, reaction was run using aryl iodide **1q** (74.8 mg, 0.2 mmol), CuI (7.6 mg, 0.04 mmol), 1,10-Phenanthroline (7.2 mg, 0.04 mmol), Pentafluoroethyl triethylsilane (187.4 mg, 0.8 mmol) and Potassium fluoride (46.4 mg, 0.8 mmol) in 2 ml DMF for 36 h. The product was purified by flash column chromatography on silica gel (hexane) and obtained as a white solid (57.9 mg, 79% yield),  $R_f$  = 0.15 (hexane). <sup>1</sup>H NMR (400 MHz, CDCl<sub>3</sub>)  $\delta$  7.94 (d,  $J$  = 8.9 Hz, 1H), 7.92 – 7.83 (m, 3H), 7.78 – 7.70 (m, 2H), 7.72 – 7.64 (m, 2H), 7.58 – 7.48 (m, 2H), 7.41 (dd,  $J$  = 8.8, 2.3 Hz, 1H). <sup>19</sup>F NMR (471 MHz, CDCl<sub>3</sub>)  $\delta$  -83.9 (s, 3F), -107.9 (s, 2F). <sup>13</sup>C NMR (101 MHz, CDCl<sub>3</sub>)  $\delta$  166.4, 148.3, 133.9, 132.6 (t,  $J$  = 3.1 Hz), 132.2, 131.8, 131.0, 129.8, 129.5, 128.6 (td,  $J$  = 7.3, 1.7 Hz), 127.9, 127.9, 126.8, 126.4 (t,  $J$  = 23.7 Hz), 126.1, 120.7, 119.4 (qt,  $J$  = 287.0, 38.7 Hz), 113.9 (tq,  $J$  = 255.6, 39.2 Hz). HRMS (ESI)  $m/z$ : [M+Na]<sup>+</sup> Calcd for C<sub>19</sub>H<sub>11</sub>F<sub>5</sub>NO<sub>2</sub> 389.0571; Found 389.0573.

#### N,N-dibenzyl-4-(perfluoroethyl)benzamide (**2r**)

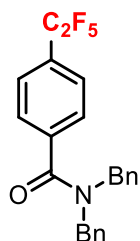

Following the general procedure **V**, reaction was run using aryl iodide **1r** (85.5 mg, 0.2 mmol), CuI (7.6

mg, 0.04 mmol), 1,10-Phenanthroline (7.2 mg, 0.04 mmol), Pentafluoroethyl triethylsilane (187.4 mg, 0.8 mmol) and Potassium fluoride (46.4 mg, 0.8 mmol) in 2 ml DMF for 36 h. The product was purified by flash column chromatography on silica gel (EA/Hexane = 1:10) and obtained as a yellow solid (43.5 mg, 52% yield),  $R_f$  = 0.2 (EA/Hexane = 1:5). **<sup>1</sup>H NMR** (400 MHz, CDCl<sub>3</sub>) δ 7.64 (s, 4H), 7.46 – 7.27 (m, 8H), 7.15 (d,  $J$  = 7.4 Hz, 2H), 4.76 (s, 2H), 4.40 (s, 2H). **<sup>19</sup>F NMR** (471 MHz, CDCl<sub>3</sub>) δ -84.6 (s, 3F), -115.1 (s, 2F). **<sup>13</sup>C NMR** (126 MHz, CDCl<sub>3</sub>) δ 170.9, 139.9, 136.6, 136.0, 129.9 (t,  $J$  = 24.2 Hz), 129.1, 128.9, 128.6, 128.0, 127.8, 127.2, 127.0 (t,  $J$  = 6.2 Hz), 119.0 (qt,  $J$  = 285.9, 39.0 Hz), 113.2 (tq,  $J$  = 254.2, 38.5 Hz), 51.6, 47.2. **HRMS** (ESI)  $m/z$ : [M+Na]<sup>+</sup> Calcd for C<sub>23</sub>H<sub>18</sub>F<sub>5</sub>NO 442.1201; Found 442.1202.

#### N-methyl-4-(perfluoroethyl)-N-phenylbenzamide (**2s**)

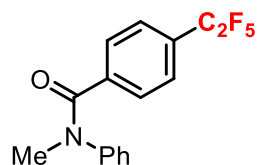

Following the general procedure **V**, reaction was run using aryl iodide **1r** (67.4 mg, 0.2 mmol), CuI (7.6 mg, 0.04 mmol), 1,10-Phenanthroline (7.2 mg, 0.04 mmol), Pentafluoroethyl triethylsilane (187.4 mg, 0.8 mmol) and Potassium fluoride (46.4 mg, 0.8 mmol) in 2 ml DMF for 36 h. The product was purified by flash column chromatography on silica gel (EA : hexane = 1 : 10) and obtained as a yellow solid (65.2 mg, 99% yield),  $R_f$  = 0.23 (EA : hexane = 1 : 6). **<sup>1</sup>H NMR** (500 MHz, CDCl<sub>3</sub>) δ 7.41 – 7.37 (m, 4H), 7.21 (t,  $J$  = 7.4 Hz, 2H), 7.14 (t,  $J$  = 7.2 Hz, 1H), 7.02 (d,  $J$  = 7.5 Hz, 2H), 3.50 (s, 3H). **<sup>19</sup>F NMR** (471 MHz, CDCl<sub>3</sub>) δ -84.9 (s, 3F), -115.3 (s, 2F). **<sup>13</sup>C NMR** (126 MHz, CDCl<sub>3</sub>) δ 169.1, 144.1, 139.7, 129.5 (t,  $J$  = 24.1 Hz), 129.4, 128.9, 127.1, 126.9, 126.0 (t,  $J$  = 6.2 Hz), 118.9 (qt,  $J$  = 286.0, 39.2 Hz), 113.0 (tq,  $J$  = 254.1, 38.3 Hz), 38.3. **HRMS** (ESI)  $m/z$ : [M+H]<sup>+</sup> Calcd for C<sub>16</sub>H<sub>12</sub>F<sub>5</sub>NO 352.0731; Found 352.0731.

#### 1-((4-(perfluoroethyl)phenyl)sulfonyl)pyrrolidine (**2t**)

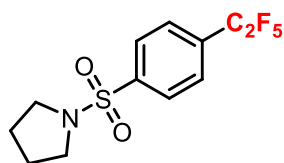

Following the general procedure **V**, reaction was run using aryl iodide **1t** (67.4 mg, 0.2 mmol), CuI (7.6 mg, 0.04 mmol), 1,10-Phenanthroline (7.2 mg, 0.04 mmol), Pentafluoroethyl triethylsilane (187.4 mg, 0.8 mmol) and Potassium fluoride (46.4 mg, 0.8 mmol) in 2 ml DMF for 36 h. The product was purified by flash column chromatography on silica gel (EA : hexane = 1 : 20) and obtained as a white solid (57.6mg, 88% yield),  $R_f$  = 0.33 (EA : hexane = 1:10). **<sup>1</sup>H NMR** (500 MHz, CDCl<sub>3</sub>) δ 7.97 (d,  $J$  = 8.0 Hz, 2H), 7.78 (d,  $J$  = 8.1 Hz, 2H), 3.28 (m, 4H), 1.83 – 1.79 (m, 4H). **<sup>19</sup>F NMR** (471 MHz, CDCl<sub>3</sub>) δ -84.5 (s, 3F), -115.2 (s, 2F). **<sup>13</sup>C NMR** (126 MHz, CDCl<sub>3</sub>) δ 141.1, 132.6 (t,  $J$  = 24.2 Hz), 127.9, 127.5 (t,  $J$  = 6.2 Hz), 118.9 (qt,  $J$  = 286.1, 38.6 Hz), 112.9 (tq,  $J$  = 254.7, 38.6 Hz), 48.1, 25.4.

**HRMS** (ESI)  $m/z$ : [M+Na]<sup>+</sup> Calcd for C<sub>12</sub>H<sub>12</sub>F<sub>5</sub>NO<sub>2</sub>S 352.0401; Found 352.04012.

1-Fluoro-4-((4-(perfluoroethyl)phenyl)sulfonyl)benzene (**2u**)

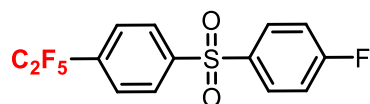

Following the general procedure **V**, reaction was run using aryl iodide **1u** (72.4 mg, 0.2 mmol), CuI (7.6 mg, 0.04 mmol), 1,10-Phenanthroline (7.2 mg, 0.04 mmol), Pentafluoroethyl triethylsilane (187.4 mg, 0.8 mmol) and Potassium fluoride (46.4 mg, 0.8 mmol) in 2 ml DMF for 36 h. The product was purified by flash column chromatography on silica gel (EA/ Hexane = 1:10) and obtained as a yellow solid (53.8 mg, 76% yield),  $R_f = 0.30$  (EA / Hexane = 1:10).  $^1\text{H NMR}$  (400 MHz,  $\text{CDCl}_3$ )  $\delta$  8.07 (d,  $J = 8.3$  Hz, 2H), 8.03 – 7.93 (m, 2H), 7.75 (d,  $J = 8.3$  Hz, 2H), 7.21 (t,  $J = 8.5$  Hz, 2H).  $^{19}\text{F NMR}$  (471 MHz,  $\text{CDCl}_3$ )  $\delta$  -84.5 (s, 3F), -102.9 (m, 1F), -115.4 (s, 2F).  $^{13}\text{C NMR}$  (101 MHz,  $\text{CDCl}_3$ )  $\delta$  166.0 (d,  $J = 257.3$  Hz), 145.4, 136.7 (d,  $J = 3.2$  Hz), 133.6 (t,  $J = 24.3$  Hz), 131.0 (d,  $J = 9.6$  Hz), 128.1, 127.9 (t,  $J = 6.2$  Hz), 118.8 (qt,  $J = 286.0, 38.4$  Hz), 117.1 (d,  $J = 22.9$  Hz), 112.8 (tq,  $J = 255.1, 38.7$  Hz). The spectra are in full accordance with the literature report.<sup>15</sup>

4-nitro-4'-(perfluoroethyl)-1,1'-biphenyl (**2v**)

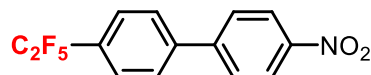

Following the general procedure **V**, reaction was run using aryl iodide **1ab** (65.0 mg, 0.2 mmol), CuI (7.6 mg, 0.04 mmol), 1,10-Phenanthroline (7.2 mg, 0.04 mmol), Pentafluoroethyl triethylsilane (187.4 mg, 0.8 mmol) and Potassium fluoride (46.4 mg, 0.8 mmol) in 2 ml DMF for 36 h. The product was purified by flash column chromatography on silica gel (DCM / Hexane = 1:10) and obtained as a white solid (57.5 mg, 91% yield),  $R_f = 0.25$  (DCM / Hexane = 1:10).  $^1\text{H NMR}$  (400 MHz,  $\text{CDCl}_3$ )  $\delta$  7.90 – 7.83 (m, 2H), 7.38 – 7.23 (m, 6H).  $^{19}\text{F NMR}$  (471 MHz,  $\text{CDCl}_3$ )  $\delta$  -84.7 (s, 3F), -115.0 (s, 2F).  $^{13}\text{C NMR}$  (101 MHz,  $\text{CDCl}_3$ )  $\delta$  147.8, 146.1, 142.6, 129.2 (t,  $J = 24.2$  Hz), 128.3, 127.9, 127.4 (t,  $J = 6.3$  Hz), 124.4, 119.2 (tq,  $J = 286.0, 39.2$  Hz), 113.4 (tq,  $J = 253.9, 38.3$  Hz). **HRMS** (ESI)  $m/z$ :  $[\text{M}+\text{Na}]^+$  Calcd for  $\text{C}_{14}\text{H}_8\text{F}_5\text{NO}_2$  340.0367; Found 340.0369.

(E)-1-(4-(perfluoroethyl)phenyl)-3-phenylprop-2-en-1-one (**2w**)

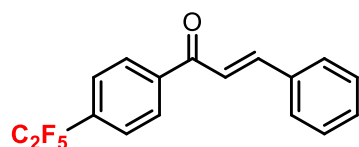

Following the general procedure **V**, reaction was run using aryl iodide **1w** (66.8 mg, 0.2 mmol), CuI (7.6 mg, 0.04 mmol), 1,10-Phenanthroline (7.2 mg, 0.04 mmol), Pentafluoroethyl triethylsilane (187.4 mg, 0.8 mmol) and Potassium fluoride (46.4 mg, 0.8 mmol) in 2 ml DMF for 36 h. The product was purified by flash column chromatography on silica gel (DCM : Hexane = 1:10) and obtained as a yellow solid (39.8 mg, 61% yield),  $R_f = 0.25$  (DCM : Hexane = 1:5).  $^1\text{H NMR}$  (400 MHz,  $\text{CDCl}_3$ )  $\delta$  8.12 (d,  $J = 8.1$  Hz, 2H), 7.84 (d,  $J = 15.7$  Hz, 1H), 7.75 (d,  $J = 8.1$  Hz, 2H), 7.70 – 7.61 (m, 2H), 7.56 – 7.38 (m, 4H).  $^{19}\text{F NMR}$  (471 MHz,  $\text{CDCl}_3$ )  $\delta$  -84.6 (s, 3F), -115.3 (s, 2F).  $^{13}\text{C NMR}$  (101 MHz,  $\text{CDCl}_3$ )  $\delta$  189.8, 146.3, 141.4, 134.7, 132.5 (t,  $J = 24.0$  Hz), 131.1, 129.2, 128.8, 128.7, 127.0 (t,  $J = 6.3$  Hz), 121.7, 119.1 (qt,  $J = 286.1, 38.9$  Hz), 113.3 (tq,  $J = 254.0, 38.4$  Hz) **HRMS** (ESI)  $m/z$ :  $[\text{M}+\text{Na}]^+$  Calcd for  $\text{C}_{17}\text{H}_{11}\text{F}_5\text{O}$  327.0803; Found 327.0805

#### 6-(perfluoroethyl)quinoline (**2x**)

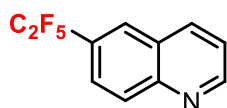

Following the general procedure **V**, reaction was run using aryl iodide **1x** (51.0 mg, 0.2 mmol), CuI (7.6 mg, 0.04 mmol), 1,10-Phenanthroline (7.2 mg, 0.04 mmol), Pentafluoroethyl triethylsilane (187.4 mg, 0.8 mmol) and Potassium fluoride (46.4 mg, 0.8 mmol) in 2 ml DMF for 36 h. The product was purified by flash column chromatography on silica gel (EA : Hexane = 1:10) and obtained as a yellow solid (32.0 mg, 65% yield),  $R_f$  = 0.30 (EA : Hexane = 1:5). **<sup>1</sup>H NMR** (500 MHz, CDCl<sub>3</sub>) δ 9.04 (s, 1H), 8.25 (t,  $J$  = 9.0 Hz, 2H), 8.12 (s, 1H), 7.86 (d,  $J$  = 8.8 Hz, 1H), 7.52 (dd,  $J$  = 7.8, 3.8 Hz, 1H). **<sup>19</sup>F NMR** (471 MHz, CDCl<sub>3</sub>) δ -84.5 (s, 3F), -114.4 (s, 2F). **<sup>13</sup>C NMR** (126 MHz, CDCl<sub>3</sub>) δ 152.6, 149.1, 137.2, 130.6, 127.6 (t,  $J$  = 7.0 Hz), 127.4, 127.0 (t,  $J$  = 24.0 Hz), 126.2 (t,  $J$  = 5.6 Hz), 122.4, 119.2 (qt,  $J$  = 285.8, 39.2 Hz), 112.4 (tq,  $J$  = 254.2, 38.3 Hz). The spectra are in full accordance with the literature report.<sup>15</sup>

#### 5-(perfluoroethyl)-1-tosyl-1H-indole **2o** (**2y**)

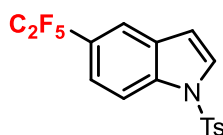

Following the general procedure **V**, reaction was run using aryl iodide **1y** (79.4 mg, 0.2 mmol), CuI (7.6 mg, 0.04 mmol), 1,10-Phenanthroline (7.2 mg, 0.04 mmol), Pentafluoroethyl triethylsilane (187.4 mg, 0.8 mmol) and Potassium fluoride (46.4 mg, 0.8 mmol) in 2 ml DMF for 36 h. The product was purified by flash column chromatography on silica gel (EA : hexane = 1:20) and obtained as a white solid (59.1 mg, 76% yield),  $R_f$  = 0.35 (EA : hexane = 1:20). **<sup>1</sup>H NMR** (500 MHz, CDCl<sub>3</sub>) δ 8.12 (d,  $J$  = 8.7 Hz, 1H), 7.82 (d,  $J$  = 8.3 Hz, 3H), 7.71 (d,  $J$  = 3.7 Hz, 1H), 7.54 (d,  $J$  = 8.4 Hz, 1H), 7.35 – 7.25 (m, 2H), 6.76 (d,  $J$  = 3.6 Hz, 1H), 2.38 (s, 3H). **<sup>19</sup>F NMR** (471 MHz, CDCl<sub>3</sub>) δ -84.7 (s, 3F), -113.3 (s, 2F). **<sup>13</sup>C NMR** (126 MHz, CDCl<sub>3</sub>) δ 145.7, 136.5, 135.1, 130.6, 130.3, 128.0, 127.0, 123.8 (t,  $J$  = 24.1 Hz), 122.4 (t,  $J$  = 6.2 Hz), 120.4 (t,  $J$  = 6.8 Hz), 119.3 (qt,  $J$  = 285.5, 39.9 Hz), 113.8 (tq,  $J$  = 253.9, 38.0 Hz), 113.7, 111.9, 108.9, 21.7. **HRMS** (ESI)  $m/z$ : [M+Na]<sup>+</sup> Calcd for C<sub>17</sub>H<sub>12</sub>F<sub>5</sub>O<sub>2</sub>S 412.0401; Found 412.0404.

#### 4-(perfluoroethyl)dibenzo[b,d]furan (**2z**)

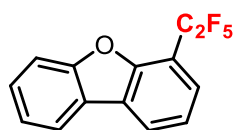

Following the general procedure **V**, reaction was run using aryl iodide **1z** (58.8 mg, 0.2 mmol), CuI (7.6 mg, 0.04 mmol), 1,10-Phenanthroline (7.2 mg, 0.04 mmol), Pentafluoroethyl triethylsilane (187.4 mg, 0.8 mmol) and Potassium fluoride (46.4 mg, 0.8 mmol) in 2 ml DMF for 36 h. The product was purified by flash column chromatography on silica gel (hexane) and obtained as a white solid (51.5 mg, 90% yield),  $R_f$  = 0.45 (hexane). **<sup>1</sup>H NMR** (500 MHz, CDCl<sub>3</sub>) δ 8.13 (d,  $J$  = 7.7 Hz, 1H), 7.97 (d,  $J$  = 7.7 Hz, 1H), 7.66 (dd,  $J$  = 8.1, 3.2 Hz, 2H), 7.53 (t,  $J$  = 7.2 Hz, 1H), 7.45 (t,  $J$  = 7.7 Hz, 1H), 7.40 (t,  $J$  = 7.5 Hz, 1H). **<sup>19</sup>F NMR** (471 MHz, CDCl<sub>3</sub>) δ -84.5 (s, 3F), -113.4 (s, 2F). **<sup>13</sup>C NMR** (126 MHz, CDCl<sub>3</sub>) δ 156.4, 152.9 (t,  $J$  = 3.0 Hz), 128.2, 126.2, 125.5 (t,  $J$  = 7.3 Hz), 124.5, 123.4, 122.8, 122.6, 120.7, 117.1 (qt,  $J$  = 286.5, 38.9 Hz), 112.1, 111.2 (tq,  $J$  = 255.0 Hz,  $J$  = 39.8 Hz). The spectra are in full accordance with



the literature report.<sup>18</sup>

#### 4-(perfluoroethyl)dibenzo[b,d]thiophene (**2aa**)

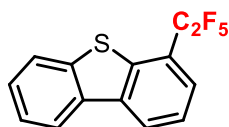

Following the general procedure **V**, reaction was run using aryl iodide **1aa** (62.0 mg, 0.2 mmol), CuI (7.6 mg, 0.04 mmol), 1,10-Phenanthroline (7.2 mg, 0.04 mmol), Pentafluoroethyl triethylsilane (187.4 mg, 0.8 mmol) and Potassium fluoride (46.4 mg, 0.8 mmol) in 2 ml DMF for 36 h. The product was purified by flash column chromatography on silica gel (hexane) and obtained as a yellow solid (40.0 mg, 67% yield),  $R_f = 0.40$  (hexane).  $^1\text{H NMR}$  (400 MHz,  $\text{CDCl}_3$ )  $\delta$  8.33 (d,  $J = 8.5$  Hz, 1H), 8.21 – 8.15 (m, 1H), 7.91 – 7.85 (m, 1H), 7.70 (d,  $J = 7.6$  Hz, 1H), 7.57 (t,  $J = 7.8$  Hz, 1H), 7.55 – 7.47 (m, 2H).  $^{19}\text{F NMR}$  (471 MHz,  $\text{CDCl}_3$ )  $\delta$  -84.3 (s, 3F), -113.9 (s, 2F).  $^{13}\text{C NMR}$  (101 MHz,  $\text{CDCl}_3$ )  $\delta$  139.7 (t,  $J = 3.2$  Hz), 137.9, 137.7, 134.2, 127.8, 126.3 (t,  $J = 7.2$  Hz), 125.0, 124.9, 124.5, 123.4 (t,  $J = 24.9$  Hz) 122.5, 121.8, 119.6 (qt,  $J = 286.8, 39.1$  Hz), 114.5 (tq,  $J = 254.3, 38.8$  Hz). The spectra are in full accordance with the literature report.<sup>15</sup>

#### 3-(perfluoroethyl)-9-phenyl-9H-carbazole (**2ab**)

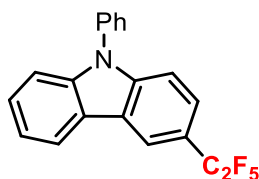

Following the general procedure **V**, reaction was run using aryl iodide **1ab** (73.8 mg, 0.2 mmol), CuI (7.6 mg, 0.04 mmol), 1,10-Phenanthroline (7.2 mg, 0.04 mmol), Pentafluoroethyl triethylsilane (187.4 mg, 0.8 mmol) and Potassium fluoride (46.4 mg, 0.8 mmol) in 2 ml DMF for 36 h. The product was purified by flash column chromatography on silica gel (EA: hexane = 1:20) and obtained as a white solid (65.7 mg, 91% yield),  $R_f = 0.25$  (EA: hexane = 1:20).  $^1\text{H NMR}$  (500 MHz,  $\text{CDCl}_3$ )  $\delta$  8.40 (s, 1H), 8.21 (d,  $J = 7.8$  Hz, 1H), 7.69 – 7.59 (m, 3H), 7.59 – 7.51 (m, 3H), 7.52 – 7.45 (m, 2H), 7.43 (d,  $J = 8.2$  Hz, 1H), 7.37 (t,  $J = 7.4$  Hz, 1H).  $^{19}\text{F NMR}$  (471 MHz,  $\text{CDCl}_3$ )  $\delta$  -84.6 (s, 3F), -112.5 (s, 2F).  $^{13}\text{C NMR}$  (126 MHz,  $\text{CDCl}_3$ )  $\delta$  142.6, 141.8, 137.1, 130.2, 128.3, 127.3, 127.1, 123.9 (t,  $J = 6.3$  Hz), 123.3, 122.9, 120.9, 120.7, 120.0 (t,  $J = 24.2$  Hz), 119.3 (t,  $J = 6.8$  Hz), 119.5 (qt,  $J = 284.1$  Hz, 40.7 Hz), 116.0 (tq,  $J = 251.9, 38.1$  Hz), 110.3, 110.1. The spectra are in full accordance with the literature report.<sup>15</sup>

#### 2-(perfluoroethyl)-9H-fluorene (**2ac**)

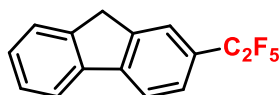

Following the general procedure **V**, reaction was run using aryl iodide **1ab** (62.0 mg, 0.2 mmol), CuI (7.6 mg, 0.04 mmol), 1,10-Phenanthroline (7.2 mg, 0.04 mmol), Pentafluoroethyl triethylsilane (187.4 mg, 0.8 mmol) and Potassium fluoride (46.4 mg, 0.8 mmol) in 2 ml DMF for 36 h. The product was purified by flash column chromatography on silica gel (hexane) and obtained as a white solid (36.9 mg, 65% yield),  $R_f = 0.45$  (hexane).  $^1\text{H NMR}$  (500 MHz,  $\text{CDCl}_3$ )  $\delta$  7.86 (m, 2H), 7.76 (s, 1H), 7.60 (m, 2H),



7.41 (m, 2H), 3.96 (s, 2H).  $^{19}\text{F}$  NMR (471 MHz,  $\text{CDCl}_3$ )  $\delta$  -84.7 (s, 3F), -113.8 (s, 2F).  $^{13}\text{C}$  NMR (126 MHz,  $\text{CDCl}_3$ )  $\delta$  145.4, 144.0, 143.6, 140.4, 128.2, 127.2, 126.5 (t,  $J = 23.8$  Hz), 125.4, 125.3, 123.2 (t,  $J = 6.4$  Hz), 120.8, 120.1, 119.3 (qt,  $J = 286.8, 39.4$  Hz), 113.9 (tq,  $J = 252.5, 38.4$  Hz), 37.0. The spectra are in full accordance with the literature report.<sup>19</sup>

(E)-1-(benzyloxy)-4-(3,3,4,4,4-pentafluorobut-1-en-1-yl)benzene (**4b**)

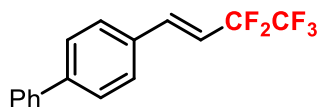

Following the general procedure **V**, reaction was run using alkenyl iodide **3b** (61.2 mg, 0.2 mmol), CuI (7.6 mg, 0.04 mmol), 1,10-Phenanthroline (7.2 mg, 0.04 mmol), Pentafluoroethyl triethylsilane (187.4 mg, 0.8 mmol) and Potassium fluoride (46.4 mg, 0.8 mmol) in 2 ml DMF for 36 h. The product was purified by flash column chromatography on silica gel (hexane) and obtained as a white solid (51.2 mg, 86% yield),  $R_f = 0.2$  (hexane).  $^1\text{H}$  NMR (500 MHz,  $\text{CDCl}_3$ )  $\delta$  7.70 – 7.62 (m, 4H), 7.59 (d,  $J = 7.9$  Hz, 2H), 7.50 (t,  $J = 7.6$  Hz, 2H), 7.42 (t,  $J = 7.4$  Hz, 1H), 7.26 (d,  $J = 15.9$  Hz, 1H), 6.25 (dt,  $J = 16.1, 12.1$  Hz, 1H).  $^{19}\text{F}$  NMR (471 MHz,  $\text{CDCl}_3$ )  $\delta$  -85.0 (s, 3F), -114.8 (d,  $J = 11.7$  Hz, 2F).  $^{13}\text{C}$  NMR (126 MHz,  $\text{CDCl}_3$ )  $\delta$  143.1, 140.2, 139.3 (t,  $J = 9.2$  Hz), 132.6, 129.1, 128.2, 128.0, 127.7, 127.2, 119.2 (qt,  $J = 285.5, 38.5$  Hz), 114.0 (t,  $J = 23.1$  Hz), 113.0 (tq,  $J = 250.2, 38.4$  Hz). The spectra are in full accordance with the literature report.<sup>20</sup>

(E)-4-(3,3,4,4,4-pentafluorobut-1-en-1-yl)-1,1'-biphenyl (**4c**)

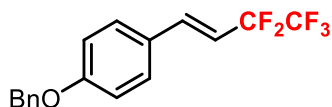

Following the general procedure **V**, reaction was run using alkenyl iodide **3c** (67.2 mg, 0.2 mmol), CuI (7.6 mg, 0.04 mmol), 1,10-Phenanthroline (7.2 mg, 0.04 mmol), Pentafluoroethyl triethylsilane (187.4 mg, 0.8 mmol) and Potassium fluoride (46.4 mg, 0.8 mmol) in 2 ml DMF for 36 h. The product was purified by flash column chromatography on silica gel (hexane) and obtained as a white solid (52.5 mg, 75% yield),  $R_f = 0.15$  (EA : hexane = 1:20).  $^1\text{H}$  NMR (500 MHz,  $\text{CDCl}_3$ )  $\delta$  7.51 – 7.41 (m, 6H), 7.42 – 7.35 (m, 1H), 7.16 (d,  $J = 16.2$  Hz, 1H), 7.02 (d,  $J = 8.1$  Hz, 2H), 6.07 (q,  $J = 12.7$  Hz, 1H), 5.13 (s, 2H).  $^{19}\text{F}$  NMR (471 MHz,  $\text{CDCl}_3$ )  $\delta$  -85.1 (s, 3F), -114.3 (dd,  $J = 12.1, 2\text{F}$ ).  $^{13}\text{C}$  NMR (126 MHz,  $\text{CDCl}_3$ )  $\delta$  160.4, 139.1 (t,  $J = 9.2$  Hz), 136.6, 129.3, 128.8, 128.3, 127.6, 126.6, 119.3 (qt,  $J = 285.6, 23.1$  Hz), 113.1 (tq,  $J = 250.2, 38.5$  Hz), 115.4, 111.7 (t,  $J = 23.1$  Hz), 70.2. HRMS (ESI)  $m/z$ :  $[\text{M}+\text{H}]^+$  Calcd for  $\text{C}_{17}\text{H}_{13}\text{F}_5\text{O}$  351.0779; Found 351.0784.

(E)-1-nitro-4-(3,3,4,4,4-pentafluorobut-1-en-1-yl)benzene (**4d**)

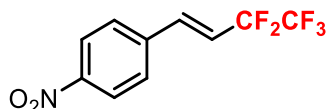

Following the general procedure **V**, reaction was run using alkenyl iodide **3d** (53.4 mg, 0.2 mmol), CuI (7.6 mg, 0.04 mmol), 1,10-Phenanthroline (7.2 mg, 0.04 mmol), Pentafluoroethyl triethylsilane (187.4 mg, 0.8 mmol) and Potassium fluoride (46.4 mg, 0.8 mmol) in 2 ml DMF for 36 h. The product was purified by flash column chromatography on silica gel (DCM : hexane = 1:5) and obtained as a yellow solid (36.2 mg, 68% yield),  $R_f = 0.25$  (DCM : hexane = 1:5).  $^1\text{H}$  NMR (500 MHz,  $\text{CDCl}_3$ )  $\delta$  8.27 (d,  $J =$

8.5 Hz, 2H), 7.65 (d,  $J = 8.5$  Hz, 2H), 7.26 (d,  $J = 16.2$  Hz, 1H), 6.35 (dt,  $J = 16.2, 11.5$  Hz, 1H).  $^{19}\text{F}$  NMR (471 MHz,  $\text{CDCl}_3$ )  $\delta$  -84.9 (s, 3F), -115.6 (d,  $J = 11.4$  Hz, 2F).  $^{13}\text{C}$  NMR (126 MHz,  $\text{CDCl}_3$ )  $\delta$  148.7, 139.6, 137.6 (t,  $J = 9.2$  Hz), 128.5, 124.4, 118.6 (t,  $J = 23.4$  Hz), 118.9 (qt,  $J = 285.5, 37.7$  Hz), 112.3 (tq,  $J = 251.4, 38.9$  Hz). The spectra are in full accordance with the literature report.<sup>21</sup>

hexyl (E)-4-(3,3,4,4,4-pentafluorobut-1-en-1-yl)benzoate (**4e**)

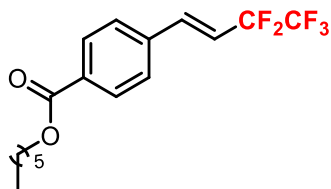

Following the general procedure **V**, reaction was run using alkenyl iodide **3e** (71.6 mg, 0.2 mmol), CuI (7.6 mg, 0.04 mmol), 1,10-Phenanthroline (7.2 mg, 0.04 mmol), Pentafluoroethyl triethylsilane (187.4 mg, 0.8 mmol) and Potassium fluoride (46.4 mg, 0.8 mmol) in 2 ml DMF for 36 h. The product was purified by flash column chromatography on silica gel (DCM : hexane = 1:10) and obtained as a colorless liquid (46.9 mg, 67% yield),  $R_f = 0.35$  (DCM : hexane = 1:5).  $^1\text{H}$  NMR (400 MHz,  $\text{CDCl}_3$ )  $\delta$  8.07 (d,  $J = 8.1$  Hz, 2H), 7.54 (d,  $J = 8.1$  Hz, 2H), 7.22 (dt,  $J = 16.3, 2.3$  Hz, 1H), 6.27 (dt,  $J = 16.2, 11.7$  Hz, 1H), 4.33 (t,  $J = 6.7$  Hz, 2H), 1.77 (p,  $J = 6.9$  Hz, 2H), 1.50 – 1.39 (m, 2H), 1.37 – 1.26 (m, 4H), 1.02 – 0.80 (m, 3H).  $^{19}\text{F}$  NMR (471 MHz,  $\text{CDCl}_3$ )  $\delta$  -85.0 (s, 3F), -115.2 (d,  $J = 11.7$  Hz, 2F).  $^{13}\text{C}$  NMR (126 MHz,  $\text{CDCl}_3$ )  $\delta$  166.1, 138.8 (t,  $J = 9.2$  Hz), 137.6, 132.0, 130.3, 127.7, 119.5 (qt,  $J = 285.1, 37.0$  Hz), 116.5 (t,  $J = 23.1$  Hz), 112.6 (tq,  $J = 249.7, 39.3$  Hz), 65.6, 31.6, 28.8, 25.8, 22.7, 14.1. HRMS (ESI)  $m/z$ :  $[\text{M}+\text{Na}]^+$  Calcd for  $\text{C}_{17}\text{H}_{19}\text{F}_5\text{O}_2$  572.0114; Found 572.0117.

(E)-1-cyano-4-(3,3,4,4,4-pentafluorobut-1-en-1-yl)benzene (**4f**)

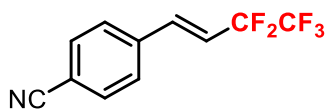

Following the general procedure **V**, reaction was run using alkenyl iodide **3f** (51.0 mg, 0.2 mmol), CuI (7.6 mg, 0.04 mmol), 1,10-Phenanthroline (7.2 mg, 0.04 mmol), Pentafluoroethyl triethylsilane (187.4 mg, 0.8 mmol) and Potassium fluoride (46.4 mg, 0.8 mmol) in 2 ml DMF for 36 h. The product was purified by flash column chromatography on silica gel (EA : hexane = 1:50) and obtained as a yellow liquid (36.9 mg, 75% yield),  $R_f = 0.4$  (DCM : hexane = 1:30).  $^1\text{H}$  NMR (500 MHz,  $\text{CDCl}_3$ )  $\delta$  7.70 (d,  $J = 8.3$  Hz, 2H), 7.58 (d,  $J = 8.1$  Hz, 2H), 7.20 (dt,  $J = 16.2, 2.4$  Hz, 1H), 6.30 (dt,  $J = 16.3, 11.6$  Hz, 1H).  $^{19}\text{F}$  NMR (471 MHz,  $\text{CDCl}_3$ )  $\delta$  -85.0 (s, 3F), -115.6 (d,  $J = 11.6$  Hz, 2F).  $^{13}\text{C}$  NMR (126 MHz,  $\text{CDCl}_3$ )  $\delta$  138.0 (t,  $J = 9.2$  Hz), 137.7, 132.8, 128.2, 118.9 (qt,  $J = 285.7, 38.0$  Hz), 118.3, 117.9 (t,  $J = 23.3$  Hz), 113.7, 112.4 (tq,  $J = 251.3, 38.9$  Hz). The spectra are in full accordance with the literature report.<sup>20</sup>

(E)-(5,5,6,6,6-pentafluorohex-3-en-1-yl)benzene (**4g**)

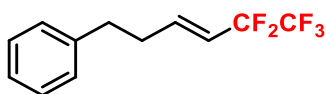

Following the general procedure **V**, reaction was run using alkenyl bromide **3h** (51.8 mg, 0.2 mmol), CuI (7.6 mg, 0.04 mmol), 1,10-Phenanthroline (7.2 mg, 0.04 mmol), Pentafluoroethyl triethylsilane (187.4 mg, 0.8 mmol) and Potassium fluoride (46.4 mg, 0.8 mmol) in 2 ml DMF for 36 h. The product was

purified by flash column chromatography on silica gel (hexane) and obtained as a colorless liquid (35.0 mg, 70% yield),  $R_f = 0.60$  (hexane).  $^1\text{H NMR}$  (500 MHz,  $\text{CDCl}_3$ )  $\delta$  7.46 – 7.30 (m, 2H), 7.33 – 7.28 (m, 1H), 7.27 – 7.22 (m, 2H), 6.69 – 6.36 (m, 1H), 5.66 (q,  $J = 13.4$  Hz, 1H), 2.90 – 2.76 (m, 2H), 2.70 – 2.42 (m, 2H).  $^{19}\text{F NMR}$  (471 MHz,  $\text{CDCl}_3$ )  $\delta$  -85.4 (s, 3F), -115.2 (d,  $J = 11.4$  Hz, 2F).  $^{13}\text{C NMR}$  (126 MHz,  $\text{CDCl}_3$ )  $\delta$  142.1 (t,  $J = 8.7$  Hz), 140.6 (d,  $J = 1.8$  Hz), 128.7, 128.5, 126.4, 119.2 (qt,  $J = 285.5$ , 39.0 Hz), 117.5 (t,  $J = 23.1$  Hz), 112.3 (tq,  $J = 250.3$ , 38.0 Hz), 34.5, 33.9. **HRMS** (APCI)  $m/z$ :  $[\text{M}+\text{H}]^+$  Calcd for  $\text{C}_{12}\text{H}_{11}\text{F}_5$  251.0854, Found 251.0849.

(3,3,4,4,4-pentafluorobut-1-ene-1,1-diyl)dibenzene (**4h**)

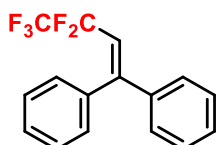

Following the general procedure **V**, reaction was run using alkenyl bromide **3h** (51.8 mg, 0.2 mmol), CuI (7.6 mg, 0.04 mmol), 1,10-Phenanthroline (7.2 mg, 0.04 mmol), Pentafluoroethyl triethylsilane (187.4 mg, 0.8 mmol) and Potassium fluoride (46.4 mg, 0.8 mmol) in 2 ml DMF for 36 h. The product was purified by flash column chromatography on silica gel (hexane) and obtained as a colorless liquid (51.3 mg, 86% yield),  $R_f = 0.28$  (hexane).  $^1\text{H NMR}$  (500 MHz,  $\text{CDCl}_3$ )  $\delta$  7.54 – 7.34 (m, 6H), 7.34 – 7.20 (m, 4H), 6.12 (t,  $J = 14.4$  Hz, 1H).  $^{19}\text{F NMR}$  (471 MHz,  $\text{CDCl}_3$ )  $\delta$  -85.2 (s, 3F), -107.6 (d,  $J = 13.3$  Hz, 2F).  $^{13}\text{C NMR}$  (126 MHz,  $\text{CDCl}_3$ )  $\delta$  154.7, 140.7, 137.6, 129.7, 129.2 (t,  $J = 2.7$  Hz), 128.6, 128.5, 128.1, 128.0, 119.3 (qt,  $J = 286.0$ , 37.6 Hz), 112.7 (t,  $J = 21.1$  Hz), 112.5 (tq,  $J = 251.9$ , 37.9 Hz). **HRMS** (ESI)  $m/z$ :  $[\text{M}+\text{H}]^+$  Calcd for  $\text{C}_{16}\text{H}_{11}\text{F}_5$  299.0854; Found 299.0854.

N-(4-bromobenzyl)-N-(4-iodobenzyl)-4-methylbenzenesulfonamide (**5**)

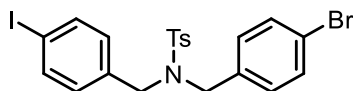

The product was purified by flash column chromatography on silica gel (EA : hexane = 1:6) and obtained as a white solid (1.36 g, 49% yield),  $R_f = 0.45$  (EA : hexane = 1:6).  $^1\text{H NMR}$  (500 MHz,  $\text{CDCl}_3$ )  $\delta$  7.72 (d,  $J = 7.1$  Hz, 2H), 7.53 (d,  $J = 7.8$  Hz, 2H), 7.37 – 7.28 (m, 4H), 6.89 (d,  $J = 7.9$  Hz, 2H), 6.76 (d,  $J = 7.8$  Hz, 2H), 4.33 – 3.98 (m, 4H), 2.46 (s, 3H).  $^{13}\text{C NMR}$  (126 MHz,  $\text{CDCl}_3$ )  $\delta$  143.8, 137.7, 137.3, 135.4, 134.7, 131.7, 130.5, 130.3, 130.0, 127.3, 121.9, 93.5, 50.5, 50.4, 21.7. **HRMS** (ESI)  $m/z$ :  $[\text{M}+\text{Na}]^+$  Calcd for  $\text{C}_{21}\text{H}_{19}\text{BrINO}_2\text{S}$  579.9238; Found 579.9237.

N-(4-bromobenzyl)-4-methyl-N-(4-(perfluoroethyl)benzyl)benzenesulfonamide (**6**)

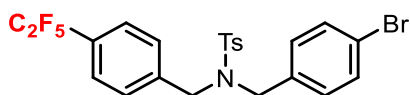

Following the general procedure **V**, reaction was run using aryl iodide **5** (11.2 mg, 0.2 mmol), CuI (7.6 mg, 0.04 mmol), 1,10-Phenanthroline (7.2 mg, 0.04 mmol), Pentafluoroethyl triethylsilane (187.4 mg, 0.8 mmol) and Potassium fluoride (46.4 mg, 0.8 mmol) in 2 ml DMF for 36 h. The product was purified by flash column chromatography on silica gel (EA : hexane = 1:20) and obtained as a white solid (83.0 mg, 76% yield),  $R_f = 0.30$  (EA : hexane = 1:20).  $^1\text{H NMR}$  (500 MHz,  $\text{CDCl}_3$ )  $\delta$  7.73 (d,  $J = 7.9$  Hz, 2H), 7.41 (d,  $J = 8.0$  Hz, 2H), 7.34 (d,  $J = 8.0$  Hz, 2H), 7.29 (d,  $J = 8.0$  Hz, 2H), 7.17 (d,  $J = 7.9$  Hz, 2H), 6.89

(d,  $J = 8.0$  Hz, 2H), 4.33 (s, 2H), 4.26 (s, 2H), 2.46 (s, 3H).  $^{19}\text{F}$  NMR (471 MHz,  $\text{CDCl}_3$ )  $\delta$  -84.8 (s, 3F), -114.8 (s, 2F).  $^{13}\text{C}$  NMR (126 MHz,  $\text{CDCl}_3$ )  $\delta$  144.0, 140.3, 137.0, 134.5, 131.7, 130.3, 130.1, 128.8, 128.2 (t,  $J = 24.1$  Hz), 127.3, 126.6 (t,  $J = 6.3$  Hz), 122.0, 119.1 (qt,  $J = 285.9, 39.4$  Hz), 112.4 (tq,  $J = 253.6, 38.1$  Hz), 51.3, 51.1, 21.7. HRMS (ESI)  $m/z$ :  $[\text{M}+\text{Na}]^+$  Calcd for  $\text{C}_{23}\text{H}_{19}\text{BrF}_5\text{NO}_2\text{S}$  572.0114; Found 572.0117.

N-((3'-methoxy-[1,1'-biphenyl]-4-yl)methyl)-4-methyl-N-(4-(perfluoroethyl)benzyl)benzenesulfonamide (7)

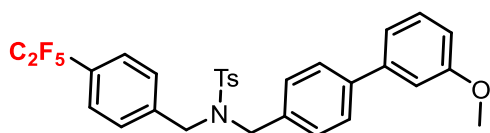

The product was purified by flash column chromatography on silica gel (EA : hexane = 1:20) and obtained as a white solid (60.5 mg, 72% yield),  $R_f = 0.22$  (EA : hexane = 1:10).  $^1\text{H}$  NMR (500 MHz,  $\text{CDCl}_3$ )  $\delta$  7.79 (d,  $J = 7.8$  Hz, 2H), 7.45 (t,  $J = 8.0$  Hz, 4H), 7.41 – 7.32 (m, 3H), 7.27 (d,  $J = 8.0$  Hz, 2H), 7.14 (t,  $J = 7.5$  Hz, 3H), 7.09 (s, 1H), 6.93 (d,  $J = 8.2$  Hz, 1H), 4.49 – 4.33 (m, 4H), 3.89 (s, 3H), 2.49 (s, 3H).  $^{19}\text{F}$  NMR (471 MHz,  $\text{CDCl}_3$ )  $\delta$  -84.7 (s, 3F), -114.7 (s, 2F).  $^{13}\text{C}$  NMR (126 MHz,  $\text{CDCl}_3$ )  $\delta$  160.1, 143.8, 142.1, 140.8, 140.6, 137.2, 134.5, 130.0, 129.9, 129.2, 128.8, 128.0 (t,  $J = 24.0$  Hz), 127.3, 127.2, 126.6 (t,  $J = 6.3$  Hz), 119.6, 119.1 (qt,  $J = 286.0, 39.4$  Hz), 113.4 (tq,  $J = 253.9, 37.8$  Hz), 112.9, 112.8, 55.4, 51.4, 50.7, 21.6. HRMS (ESI)  $m/z$ :  $[\text{M}+\text{Na}]^+$  Calcd for  $\text{C}_{30}\text{H}_{26}\text{F}_5\text{NO}_3\text{S}$  598.1446; Found 598.1453.

ethyl 4-(2,2,2-trifluoroethyl)benzoate (8a)

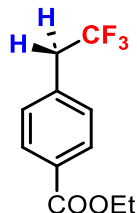

Following the general procedure VI, reaction was run using pentafluoroethyl benzene 2f (51.8 mg, 0.2 mmol), Ammonium formate (50.4mg, 0.8 mmol) and 1-Naph-PTH (7.5 mg, 0.02 mmol) in 1 ml DMSO for 12 h. The product was purified by flash column chromatography on silica gel (DCM : hexane = 1:10) and obtained as a colorless liquid (42.7 mg, 92% yield),  $R_f = 0.20$  (DCM : hexane = 1:10).  $^1\text{H}$  NMR (500 MHz,  $\text{CDCl}_3$ )  $\delta$  8.04 (d,  $J = 8.3$  Hz, 2H), 7.37 (d,  $J = 8.0$  Hz, 2H), 4.38 (q,  $J = 7.1$  Hz, 2H), 3.43 (q,  $J = 10.7$  Hz, 2H), 1.39 (t,  $J = 7.1$  Hz, 3H).  $^{19}\text{F}$  NMR (471 MHz,  $\text{CDCl}_3$ )  $\delta$  -65.6 (t,  $J = 10.7$  Hz, 3F).  $^{13}\text{C}$  NMR (101 MHz,  $\text{CDCl}_3$ )  $\delta$  166.3, 135.1 (q,  $J = 3.0$  Hz), 130.6, 130.3, 130.0, 125.6 (q,  $J = 276.9$  Hz), 61.2, 40.3 (q,  $J = 30.0$  Hz), 14.4. The spectra are in full accordance with the literature report.<sup>22</sup>

benzyl 4-(2,2,2-trifluoroethyl)benzoate (8b)

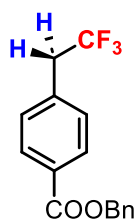

Following the general procedure **VI**, reaction was run using pentafluoroethyl benzene **2g** (66.0 mg, 0.2 mmol), Ammonium formate (50.4mg, 0.8 mmol) and 1-Naph-PTH (7.5 mg, 0.02 mmol) in 1 ml DMSO for 48 h. The product was purified by flash column chromatography on silica gel (DCM : hexane = 1:5) and obtained as a colorless liquid (41.8 mg, 71% yield),  $R_f = 0.15$  (DCM : hexane = 1:5).  $^1\text{H NMR}$  (500 MHz,  $\text{CDCl}_3$ )  $\delta$  8.08 (d,  $J = 8.4$  Hz, 2H), 7.48 – 7.44 (m, 2H), 7.43 – 7.33 (m, 5H), 5.38 (s, 2H), 3.43 (q,  $J = 10.7$  Hz, 2H).  $^{19}\text{F NMR}$  (471 MHz,  $\text{CDCl}_3$ )  $\delta$  -65.6 (t,  $J = 10.6$  Hz, 3F).  $^{13}\text{C NMR}$  (126 MHz,  $\text{CDCl}_3$ )  $\delta$  166.1, 136.0, 135.3 (q,  $J = 3.0$  Hz), 130.8, 130.4, 130.2, 128.8, 128.5, 128.3, 125.5 (q,  $J = 277.0$  Hz), 67.0, 40.3 (q,  $J = 30.0$  Hz). **HRMS** (ESI)  $m/z$ :  $[\text{M}+\text{Na}]^+$  Calcd for  $\text{C}_{16}\text{H}_{13}\text{F}_3\text{O}_2$  317.0760; Found 317.0760.

4-(2,2,2-trifluoroethyl)benzonitrile (**8c**)

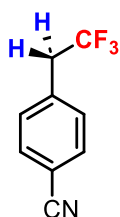

Following the general procedure **VI**, reaction was run using pentafluoroethyl benzene **2e** (44.2 mg, 0.2 mmol), Ammonium formate (50.4mg, 0.8 mmol) and 1-Naph-PTH (7.5 mg, 0.02 mmol) in 1 ml DMSO for 12 h. The product was purified by flash column chromatography on silica gel (DCM : hexane = 1:10) and obtained as a white solid (30.7 mg, 83% yield),  $R_f = 0.25$  (DCM : hexane = 1:10).  $^1\text{H NMR}$  (400 MHz,  $\text{CDCl}_3$ )  $\delta$  7.67 (d,  $J = 7.9$  Hz, 2H), 7.43 (d,  $J = 7.9$  Hz, 2H), 3.44 (q,  $J = 10.5$  Hz, 2H).  $^{19}\text{F NMR}$  (471 MHz,  $\text{CDCl}_3$ )  $\delta$  -65.5 (t,  $J = 10.5$  Hz, 3F).  $^{13}\text{C NMR}$  (101 MHz,  $\text{CDCl}_3$ )  $\delta$  135.4 (q,  $J = 3.0$  Hz), 132.6, 131.1, 125.3 (q,  $J = 277.0$  Hz), 118.5, 112.5, 40.4 (q,  $J = 30.3$  Hz). The spectra are in full accordance with the literature report.<sup>23</sup>

ethyl 2-(2,2,2-trifluoroethyl)benzoate (**8d**)

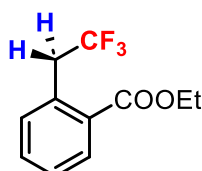

Following the general procedure **VI**, reaction was run using pentafluoroethyl benzene **2i** (51.8 mg, 0.2 mmol), Ammonium formate (50.4mg, 0.8 mmol) and 1-Naph-PTH (7.5 mg, 0.02 mmol) in 1 ml DMSO for 12 h. The product was purified by flash column chromatography on silica gel (DCM : hexane = 1:10) and obtained as a colorless liquid (33.9 mg, 73% yield),  $R_f = 0.20$  (DCM : hexane = 1:10).  $^1\text{H NMR}$  (500 MHz,  $\text{CDCl}_3$ )  $\delta$  7.97 (dd,  $J = 7.8, 1.4$  Hz, 1H), 7.50 (td,  $J = 7.5, 1.5$  Hz, 1H), 7.41 (td,  $J = 7.6, 1.4$  Hz, 1H), 7.37 (d,  $J = 7.7$  Hz, 1H), 4.38 (q,  $J = 7.1$  Hz, 2H), 4.00 (q,  $J = 10.8$  Hz, 2H), 1.40 (t,  $J = 7.1$  Hz, 3H).  $^{19}\text{F NMR}$  (471 MHz,  $\text{CDCl}_3$ )  $\delta$  -65.2 (t,  $J = 10.6$  Hz, 3F).  $^{13}\text{C NMR}$  (126 MHz,  $\text{CDCl}_3$ )  $\delta$  167.4, 132.7, 132.1, 131.4, 131.3 (q,  $J = 3.1$  Hz), 131.1, 128.3, 126.0 (q,  $J = 277.3$  Hz), 61.4, 37.1 (q,  $J = 29.6$  Hz), 14.3. **HRMS** (ESI)  $m/z$ :  $[\text{M}+\text{Na}]^+$  Calcd for  $\text{C}_{11}\text{H}_{11}\text{F}_3\text{O}_2$  255.0603; Found 255.0604.

benzyl 2-(2,2,2-trifluoroethyl)benzoate (**8e**)

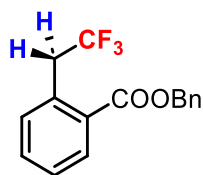

Following the general procedure **VI**, reaction was run using pentafluoroethyl benzene **2m** (66.0 mg, 0.2 mmol), Ammonium formate (50.4mg, 0.8 mmol) and 1-Naph-PTH (7.5 mg, 0.02 mmol) in 1 ml DMSO for 48 h. The product was purified by flash column chromatography on silica gel (DCM : hexane = 1:5) and obtained as a colorless liquid (35.3 mg, 60% yield),  $R_f$  = 0.18 (DCM : hexane = 1:4). **<sup>1</sup>H NMR** (500 MHz, CDCl<sub>3</sub>) δ 8.02 (dd,  $J$  = 7.9, 1.4 Hz, 1H), 7.51 (td,  $J$  = 7.5, 1.5 Hz, 1H), 7.47 – 7.43 (m, 2H), 7.43 – 7.33 (m, 5H), 5.36 (s, 2H), 4.01 (q,  $J$  = 10.7 Hz, 2H). **<sup>19</sup>F NMR** (471 MHz, CDCl<sub>3</sub>) δ -65.2 (t,  $J$  = 10.6 Hz, 3F). **<sup>13</sup>C NMR** (126 MHz, CDCl<sub>3</sub>) δ 167.0, 135.8, 132.8, 132.3, 131.6 (q,  $J$  = 3.0 Hz), 131.3, 130.9, 128.8, 128.5, 128.5, 128.4, 125.9 (q,  $J$  = 277.3 Hz), 67.2, 37.1 (q,  $J$  = 29.7 Hz). **HRMS** (ESI)  $m/z$ : [M+Na]<sup>+</sup> Calcd for C<sub>16</sub>H<sub>13</sub>F<sub>3</sub>O<sub>2</sub> 317.0760; Found 317.0761.

hexyl 2-(2,2,2-trifluoroethyl)benzoate (**8f**)

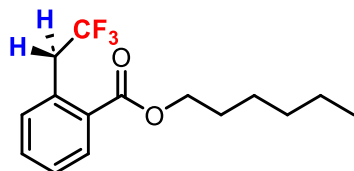

Following the general procedure **VI**, reaction was run using pentafluoroethyl benzene **2n** (62.8 mg, 0.2 mmol), Ammonium formate (50.4mg, 0.8 mmol) and 1-Naph-PTH (7.5 mg, 0.02 mmol) in 1 ml DMSO for 12 h. The product was purified by flash column chromatography on silica gel (DCM : hexane = 1:10) and obtained as a yellow liquid (42.0 mg, 73% yield),  $R_f$  = 0.2 (DCM : hexane = 1:10). **<sup>1</sup>H NMR** (500 MHz, CDCl<sub>3</sub>) δ 7.97 (dd,  $J$  = 7.8, 1.5 Hz, 1H), 7.50 (td,  $J$  = 7.5, 1.5 Hz, 1H), 7.41 (td,  $J$  = 7.7, 1.4 Hz, 1H), 7.37 (d,  $J$  = 7.7 Hz, 1H), 4.32 (t,  $J$  = 6.7 Hz, 2H), 4.01 (q,  $J$  = 10.8 Hz, 2H), 1.76 (p,  $J$  = 6.9 Hz, 2H), 1.49 – 1.39 (m, 2H), 1.38 – 1.29 (m, 4H), 0.98 – 0.82 (m, 3H). **<sup>19</sup>F NMR** (471 MHz, CDCl<sub>3</sub>) δ -65.2 (t,  $J$  = 10.8 Hz, 3F). **<sup>13</sup>C NMR** (126 MHz, CDCl<sub>3</sub>) δ 167.4, 132.7, 132.1, 131.4, 131.3 (q,  $J$  = 3.1 Hz), 131.1, 128.3, 126.0 (q,  $J$  = 277.4 Hz), 65.6, 37.1 (q,  $J$  = 29.6 Hz), 31.6, 28.7, 25.8, 22.7, 14.1. **HRMS** (ESI)  $m/z$ : [M+Na]<sup>+</sup> Calcd for C<sub>15</sub>H<sub>19</sub>F<sub>3</sub>O<sub>2</sub> 311.1229; Found 311.1225.

1-((4-(2,2,2-trifluoroethyl)phenyl)sulfonyl)pyrrolidine (**8g**)

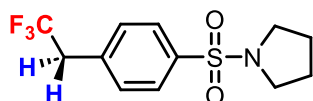

Following the general procedure **VI**, reaction was run using pentafluoroethyl benzene **2t** (65.8 mg, 0.2 mmol), Ammonium formate (50.4mg, 0.8 mmol) and 1-Naph-PTH (15.0 mg, 0.04 mmol) in 1 ml DMSO for 48 h. The product was purified by flash column chromatography on silica gel (EA : hexane = 1:10) and obtained as a yellow liquid (35.21 mg, 60% yield),  $R_f$  = 0.25 (EA : hexane = 1:10). **<sup>1</sup>H NMR** (500 MHz, CDCl<sub>3</sub>) δ 7.82 (d,  $J$  = 8.3 Hz, 2H), 7.46 (d,  $J$  = 8.0 Hz, 2H), 3.45 (q,  $J$  = 10.6 Hz, 2H), 3.39 – 3.22 (m, 4H), 1.88 – 1.63 (m, 4H). **<sup>19</sup>F NMR** (471 MHz, CDCl<sub>3</sub>) δ -65.5 (t,  $J$  = 10.5 Hz, 3F). **<sup>13</sup>C NMR** (126 MHz, CDCl<sub>3</sub>) δ 137.2, 135.0 (q,  $J$  = 2.9 Hz), 131.0, 128.0, 125.4 (q,  $J$  = 277.1 Hz), 48.1, 40.2 (q,  $J$  = 30.1 Hz), 25.4. **HRMS** (ESI)  $m/z$ : [M+Na]<sup>+</sup> Calcd for C<sub>12</sub>H<sub>14</sub>F<sub>3</sub>NO<sub>2</sub>S 316.0590; Found 316.0590.

1-fluoro-4-((4-(2,2,2-trifluoroethyl)phenyl)sulfonyl)benzene (**8h**)

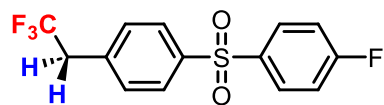

Following the general procedure **VI**, reaction was run using pentafluoroethyl benzene **2u** (70.9 mg, 0.2 mmol), Ammonium formate (50.4mg, 0.8 mmol) and 1-Naph-PTH (15.0 mg, 0.04 mmol) in 1 ml DMSO for 48 h. The product was purified by flash column chromatography on silica gel (EA : hexane = 1:10) and obtained as a yellow liquid (42.6 mg, 67% yield),  $R_f = 0.3$  (EA : hexane = 1:10).  $^1\text{H NMR}$  (500 MHz,  $\text{CDCl}_3$ )  $\delta$  8.00 – 7.94 (m, 2H), 7.92 (d,  $J = 8.4$  Hz, 2H), 7.45 (d,  $J = 8.1$  Hz, 2H), 7.24 – 7.15 (m, 2H), 3.43 (q,  $J = 10.6$  Hz, 2H).  $^{19}\text{F NMR}$  (471 MHz,  $\text{CDCl}_3$ )  $\delta$  -65.4 (t,  $J = 10.5$  Hz, 3F), -101.6 – -105.6 (m, 1F).  $^{13}\text{C NMR}$  (126 MHz,  $\text{CDCl}_3$ )  $\delta$  165.7 (d,  $J = 256.5$  Hz), 141.6, 137.4 (d,  $J = 3.2$  Hz), 135.9 (q,  $J = 2.9$  Hz), 131.3, 130.7 (d,  $J = 9.6$  Hz), 128.1, 125.3 (q,  $J = 277.2$  Hz), 116.9 (d,  $J = 22.7$  Hz), 40.2 (q,  $J = 30.0$  Hz). **HRMS** (ESI)  $m/z$ :  $[\text{M}+\text{Na}]^+$  Calcd for  $\text{C}_{14}\text{H}_{10}\text{F}_4\text{O}_2\text{S}$  341.0230; Found 341.0228.

## IX. Spectra

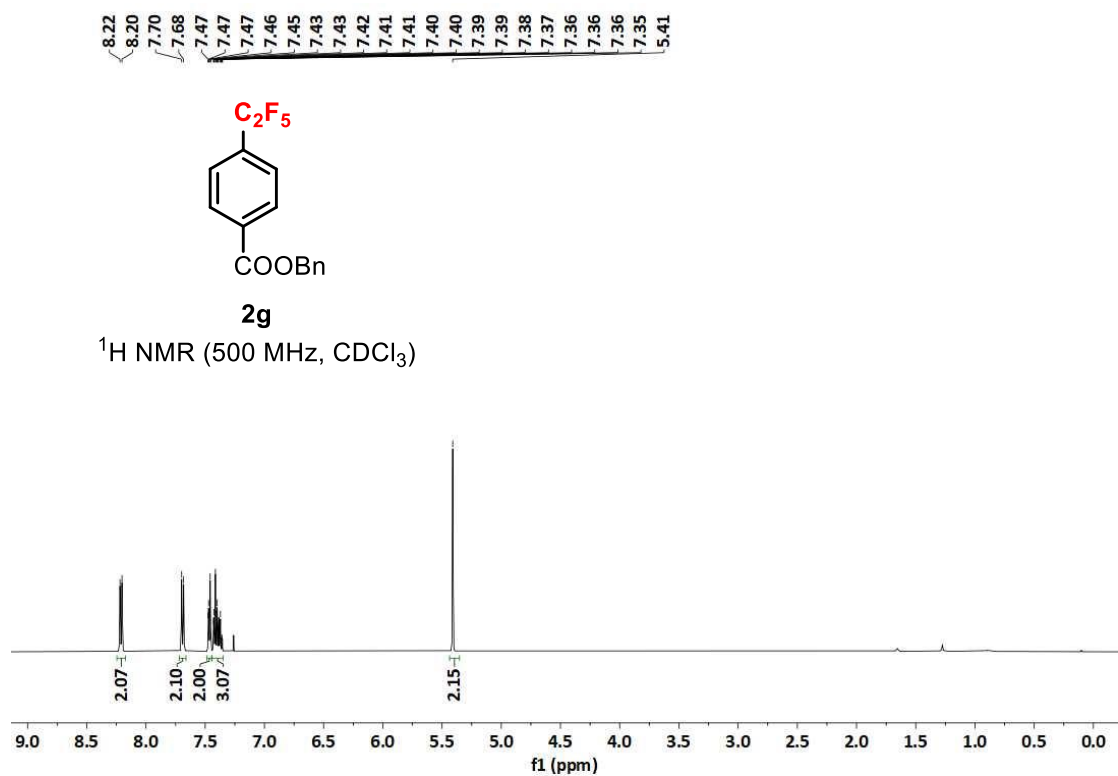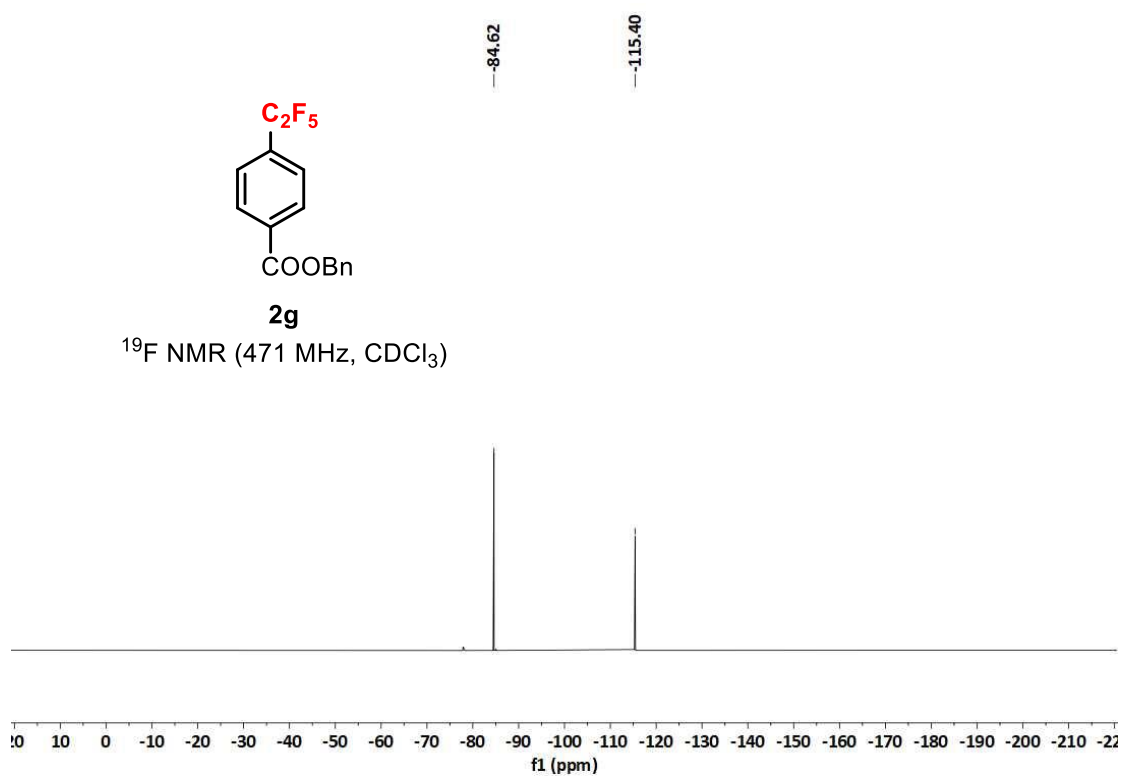



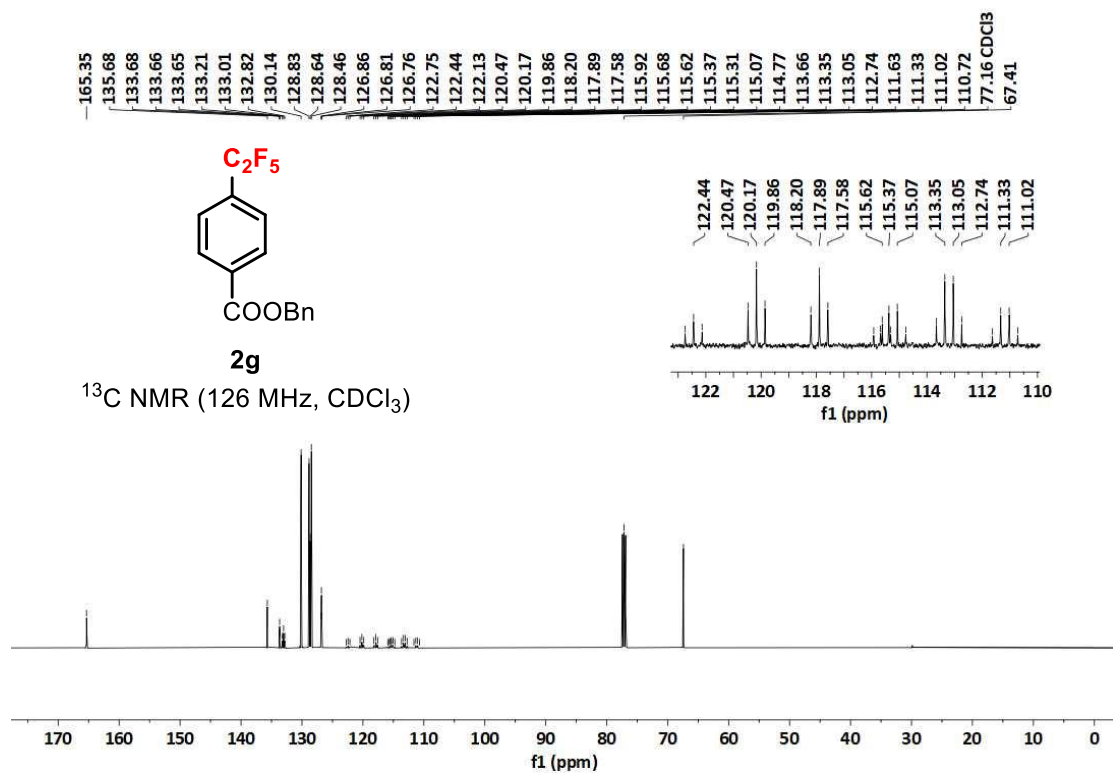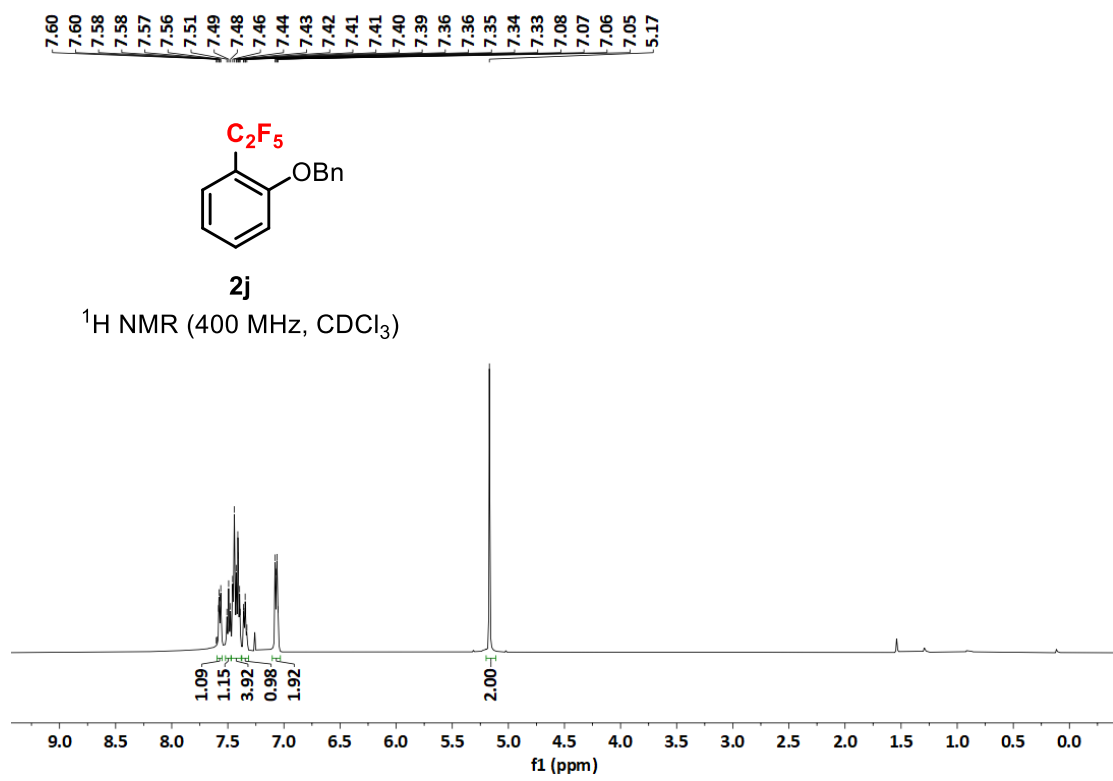

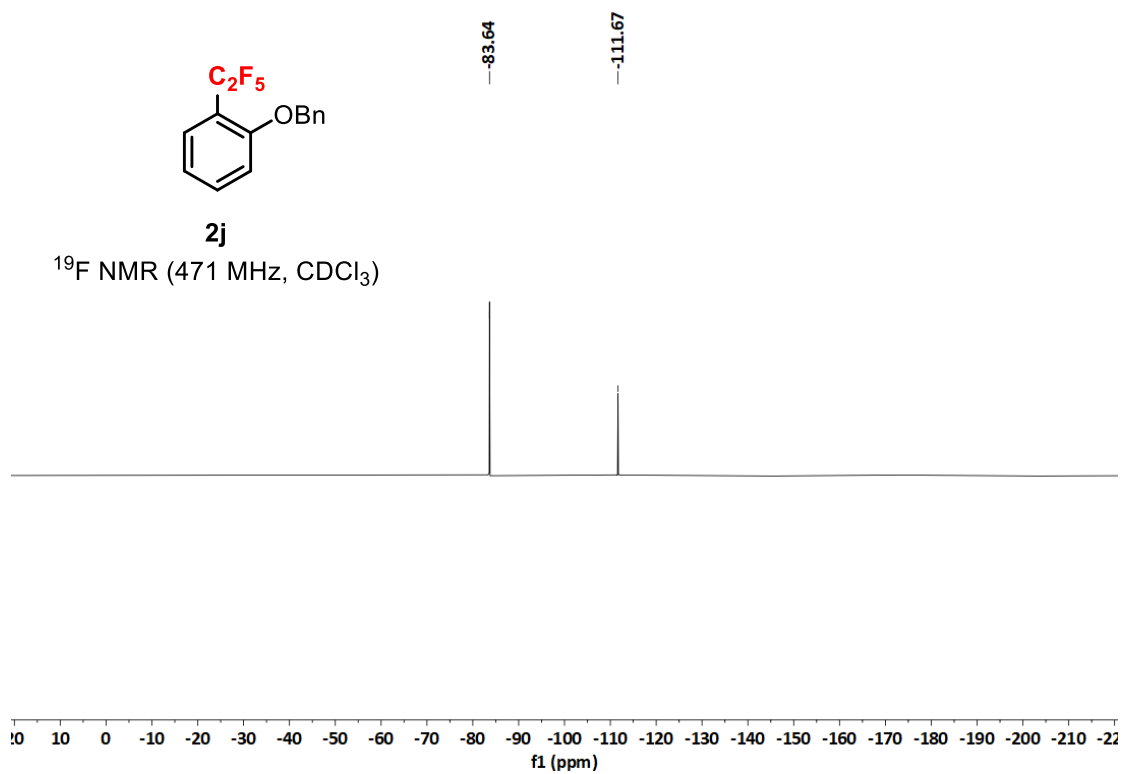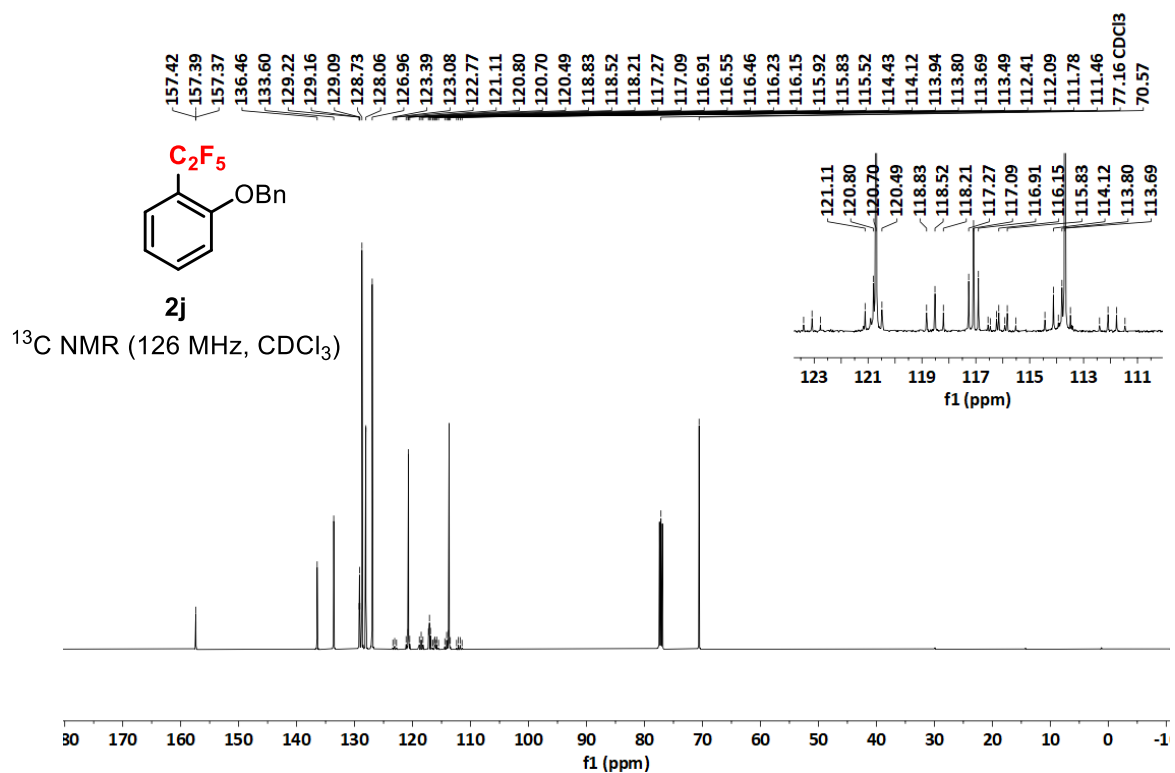

7.65  
7.63  
7.60  
7.60  
7.59  
7.58  
7.57  
7.56  
7.55  
7.46  
7.46  
7.45  
7.44  
7.43  
7.42  
7.42  
7.41  
7.39  
7.38  
7.38  
7.37  
7.37  
7.35  
5.38

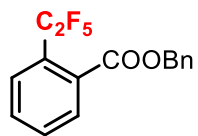

2m

$^1H$  NMR (400 MHz,  $CDCl_3$ )

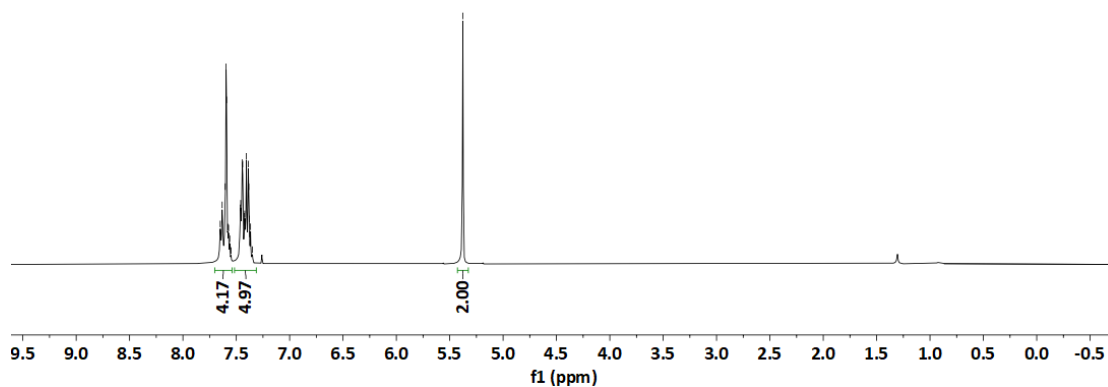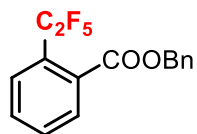

2m

$^{19}F$  NMR (471 MHz,  $CDCl_3$ )

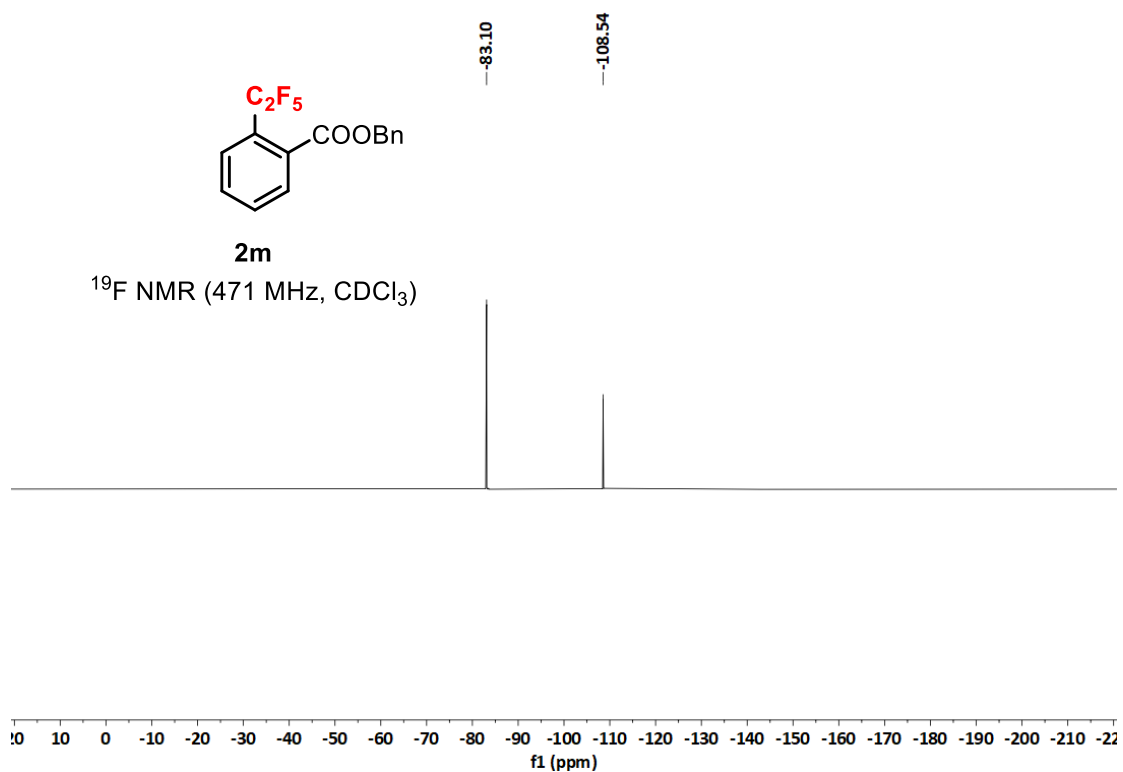

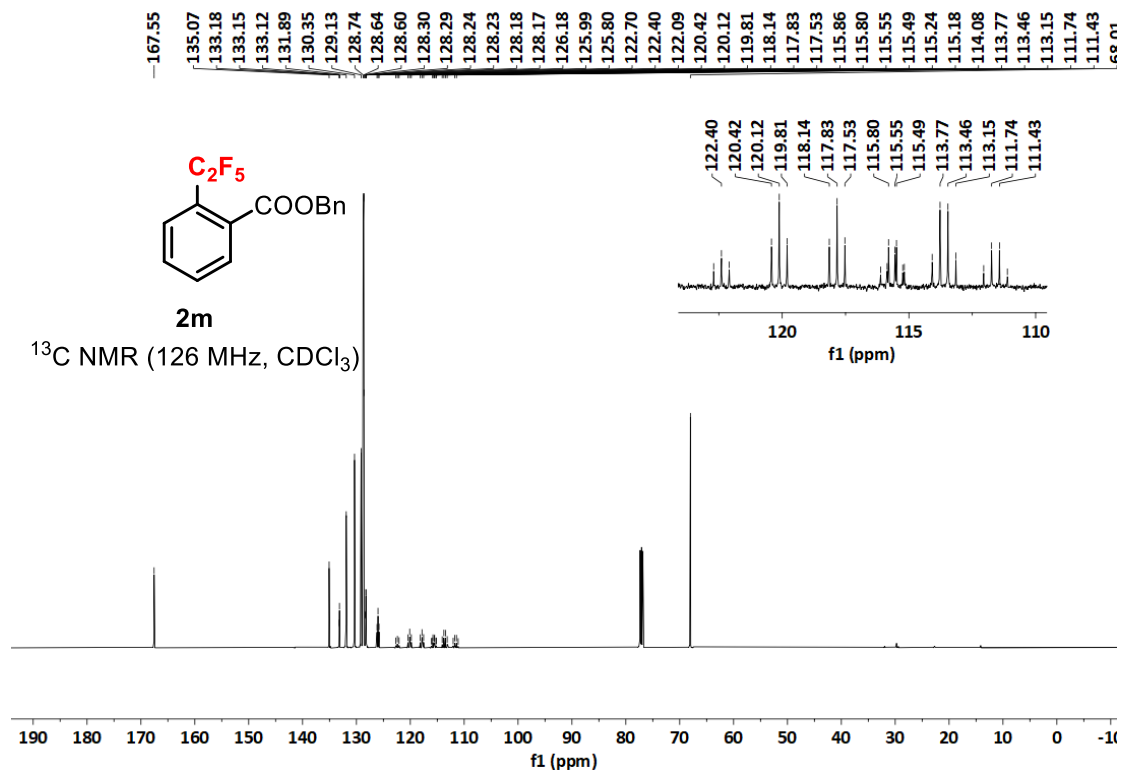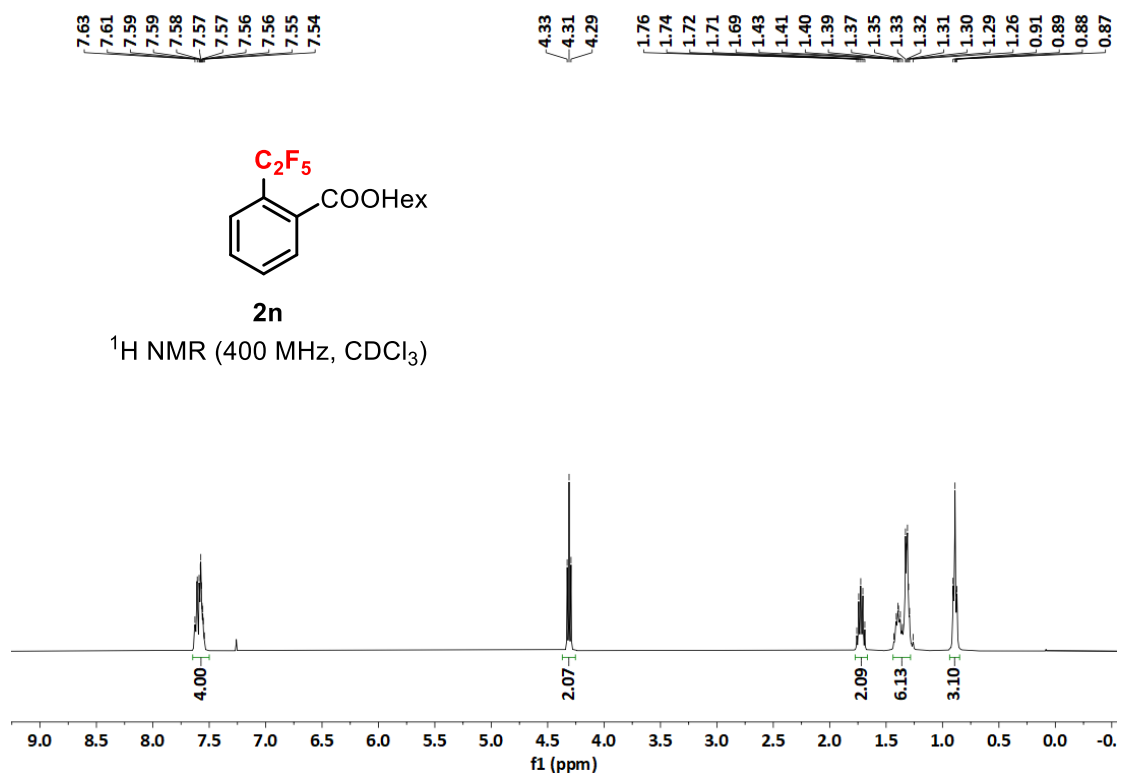

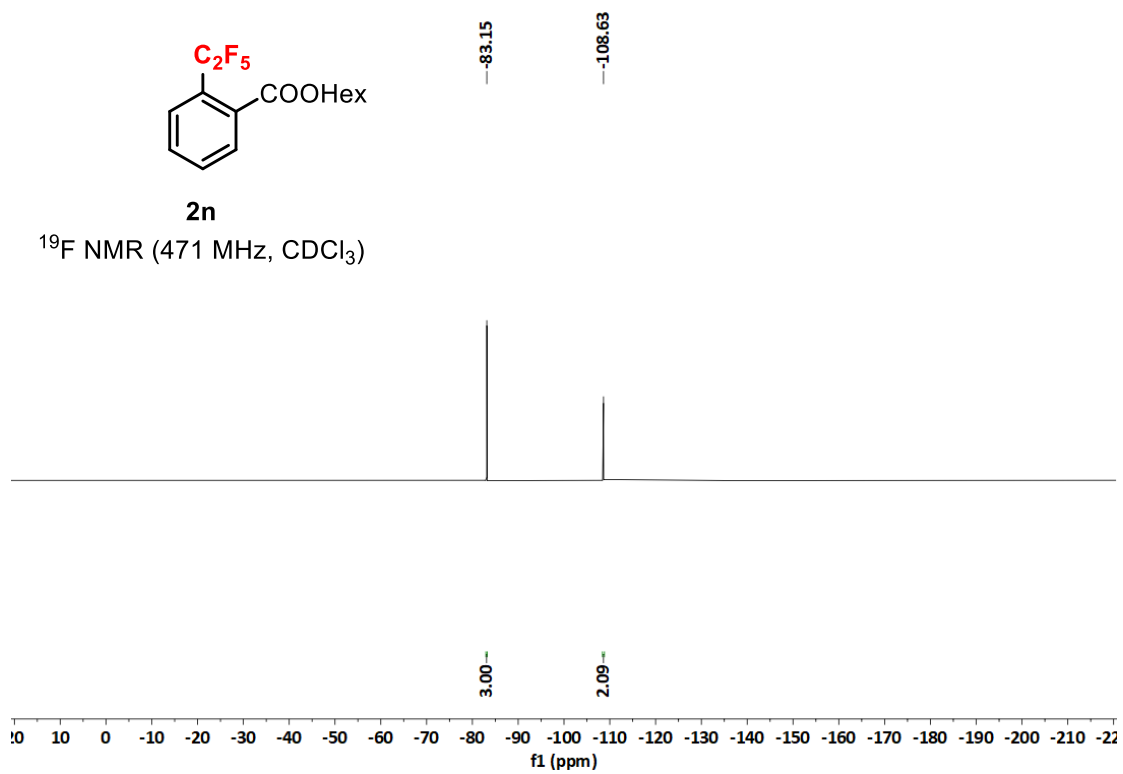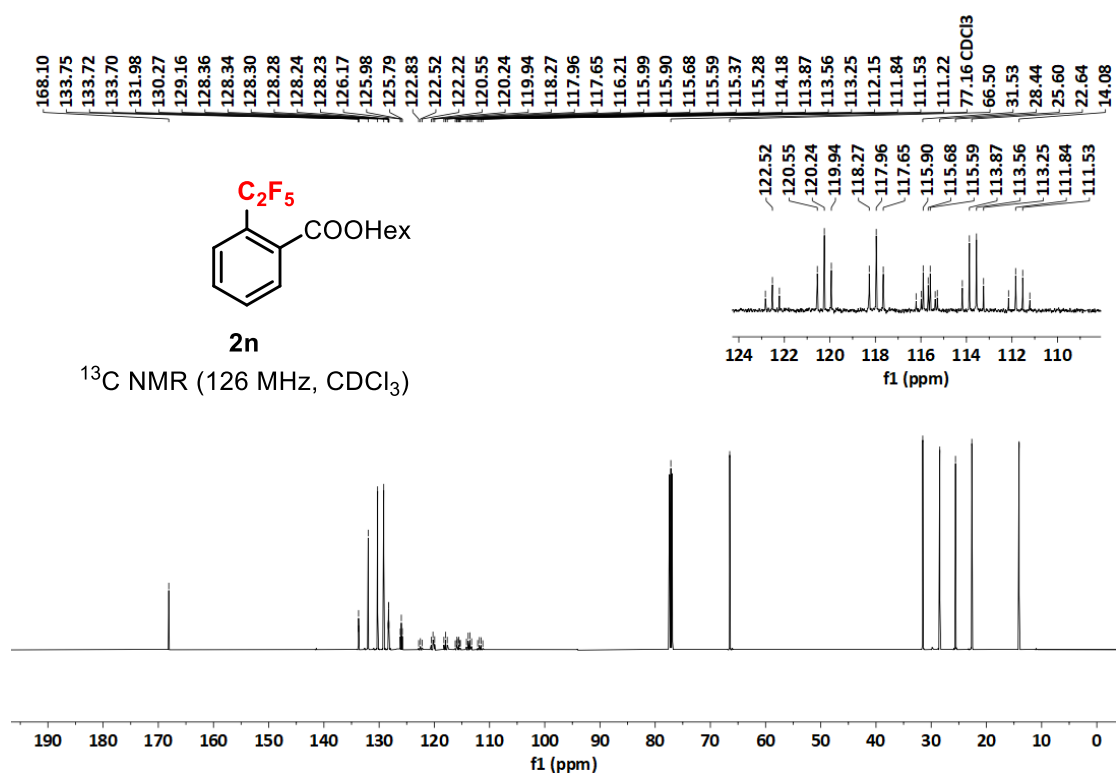

7.95  
7.93  
7.90  
7.89  
7.87  
7.86  
7.84  
7.76  
7.74  
7.73  
7.71  
7.69  
7.67  
7.65  
7.57  
7.55  
7.53  
7.51  
7.49  
7.42  
7.41  
7.40  
7.39

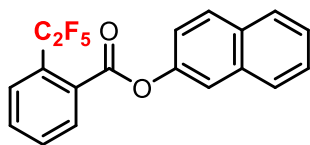

**2q**

<sup>1</sup>H NMR (500 MHz, CDCl<sub>3</sub>)

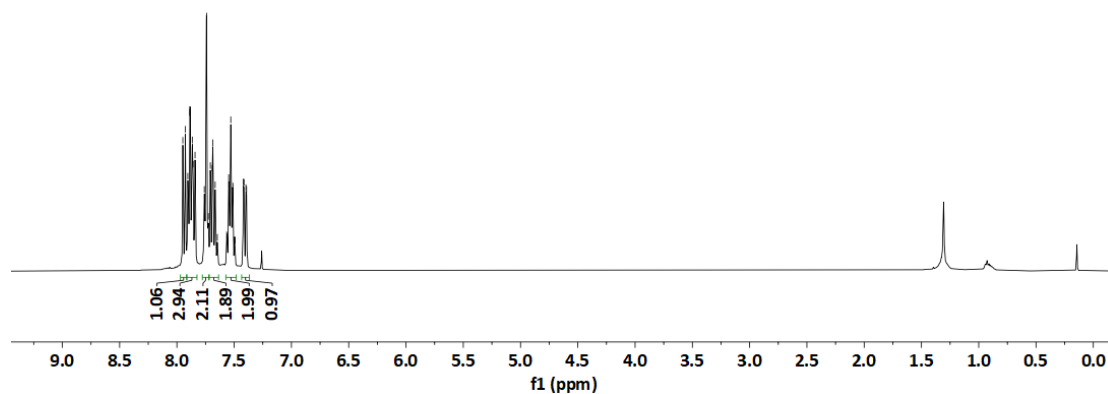

-82.92

-107.88

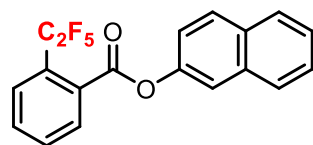

**2q**

<sup>19</sup>F NMR (471 MHz, CDCl<sub>3</sub>)

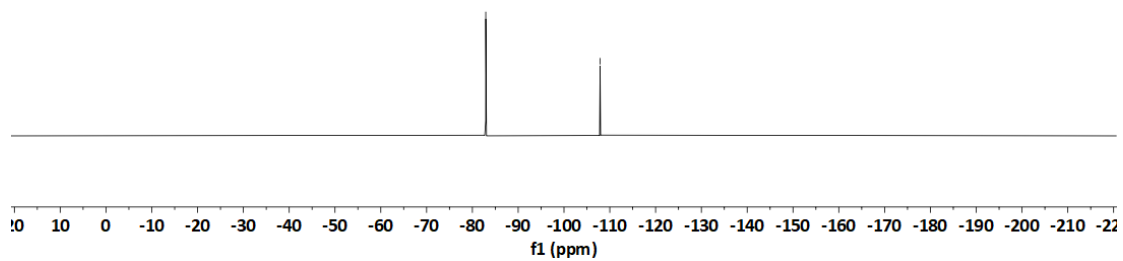

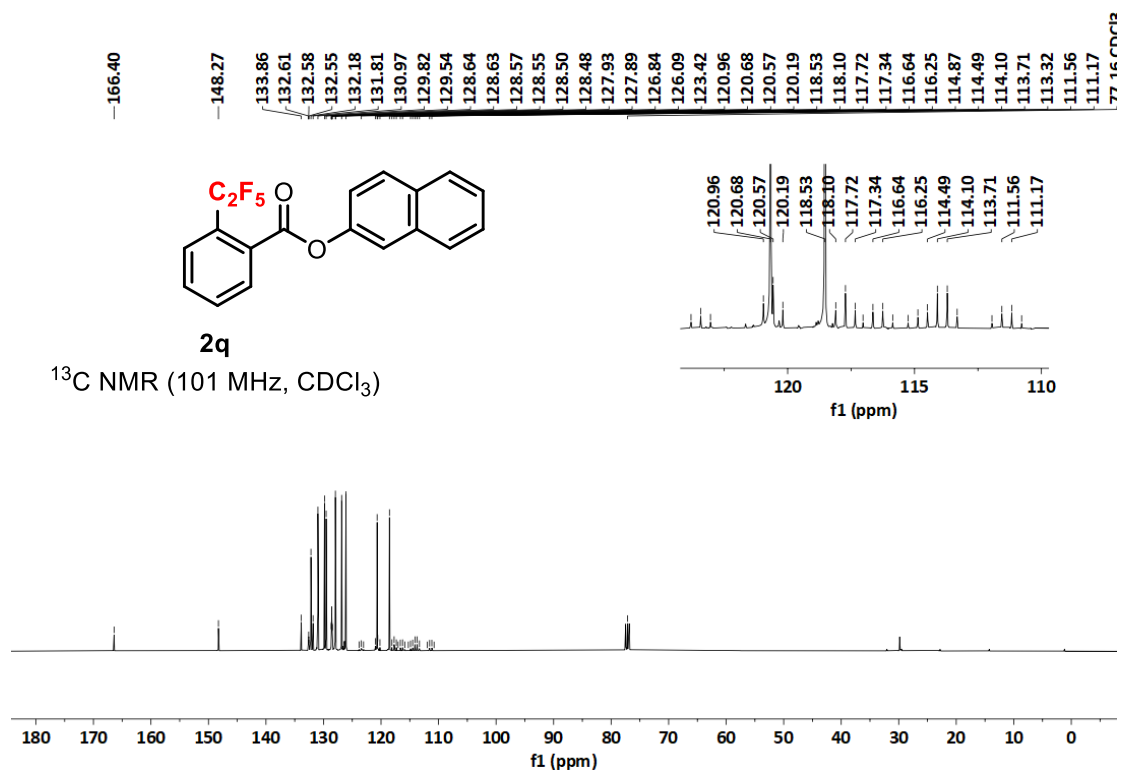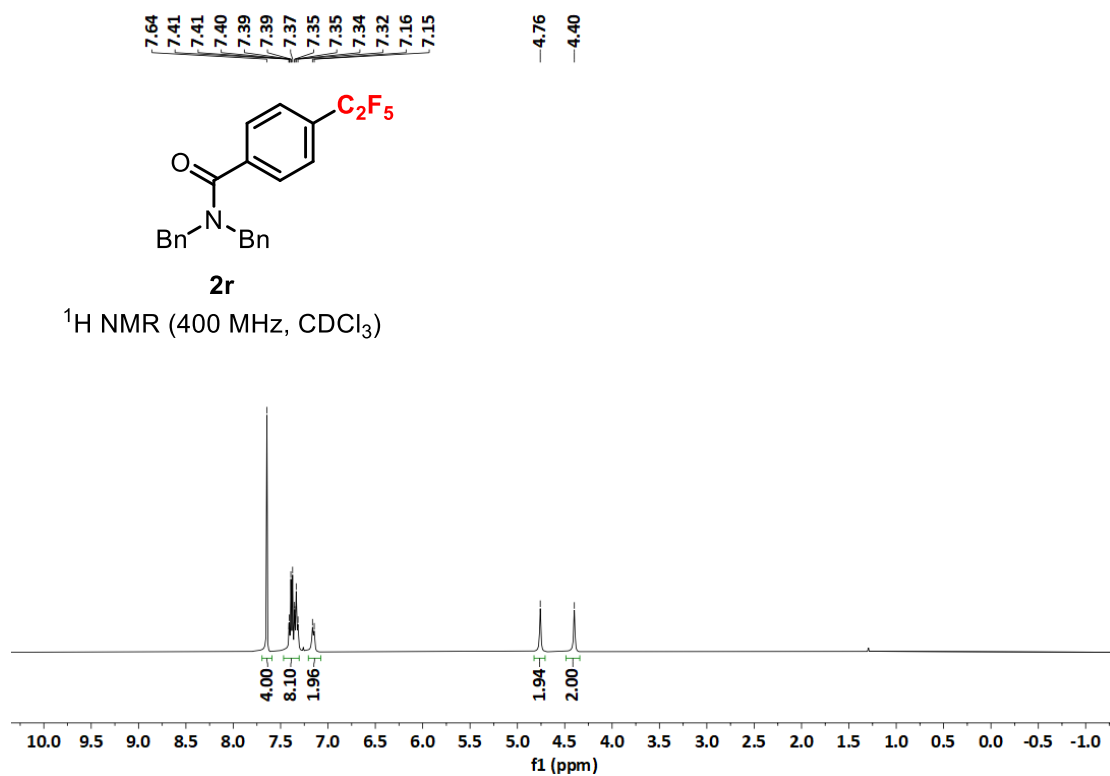

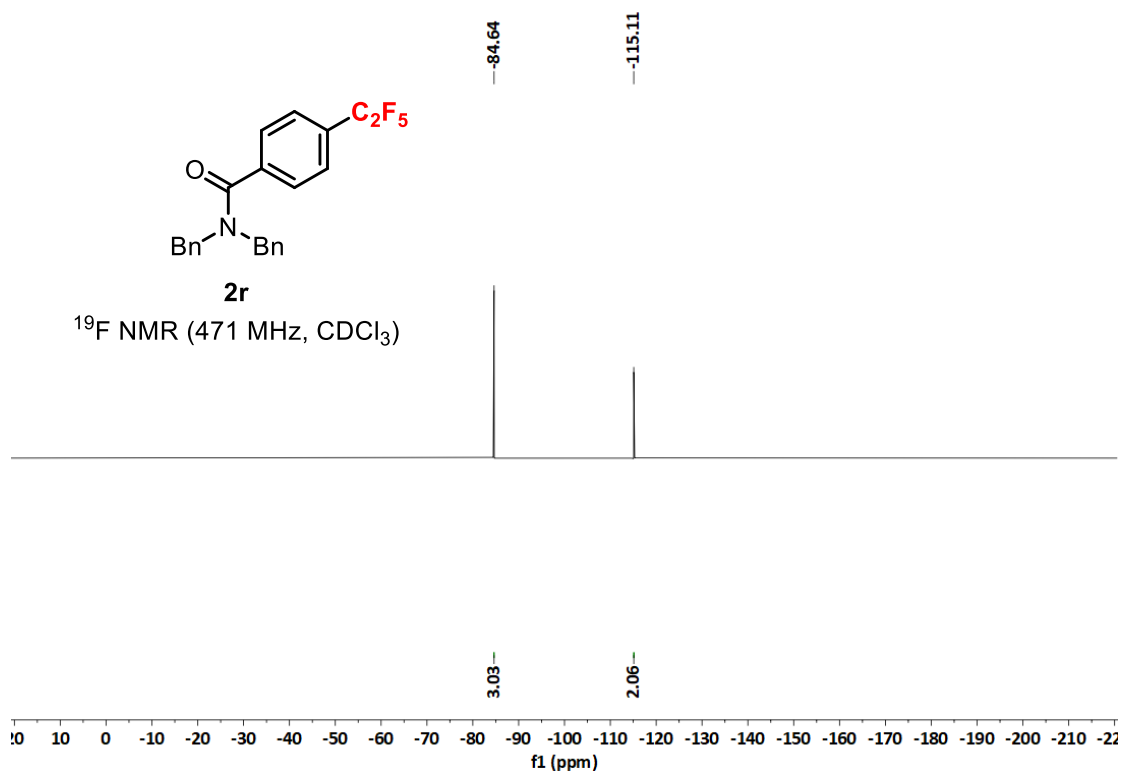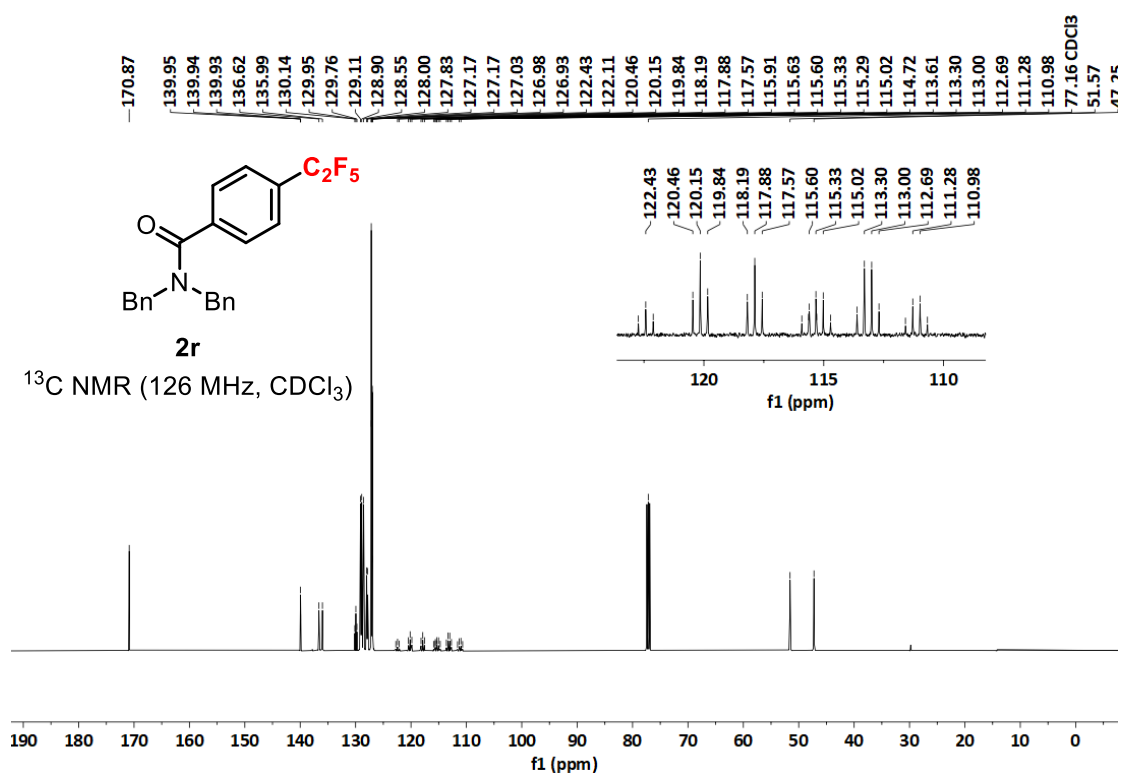



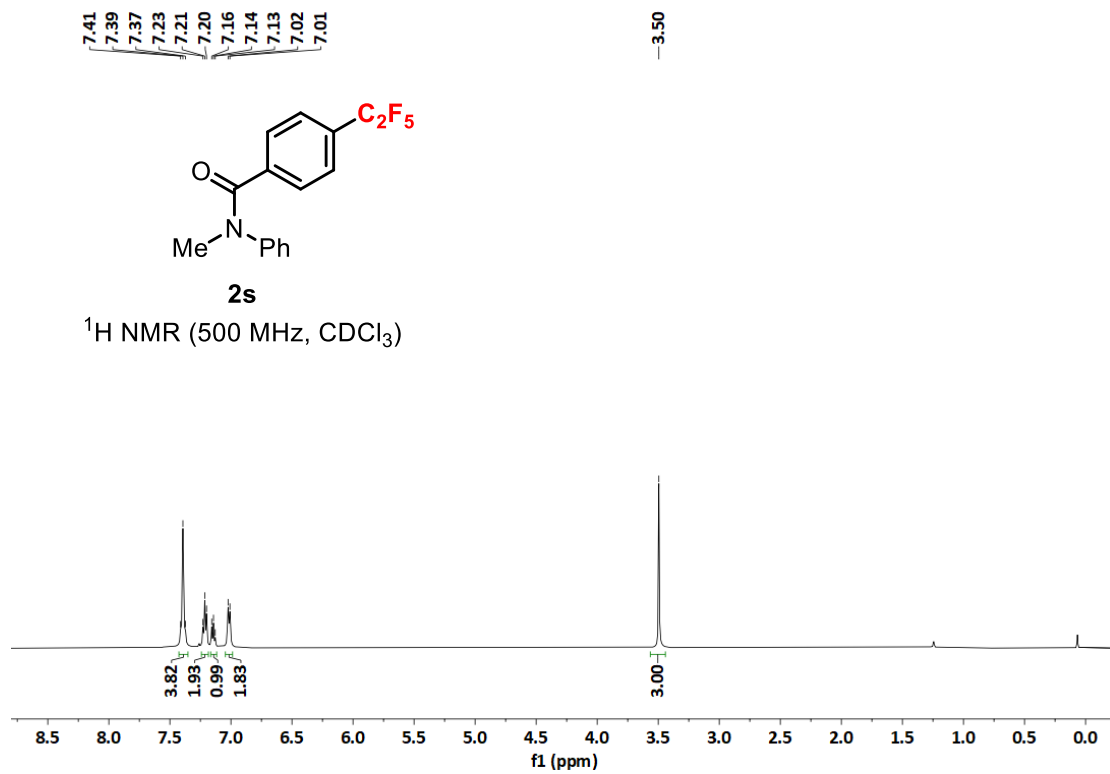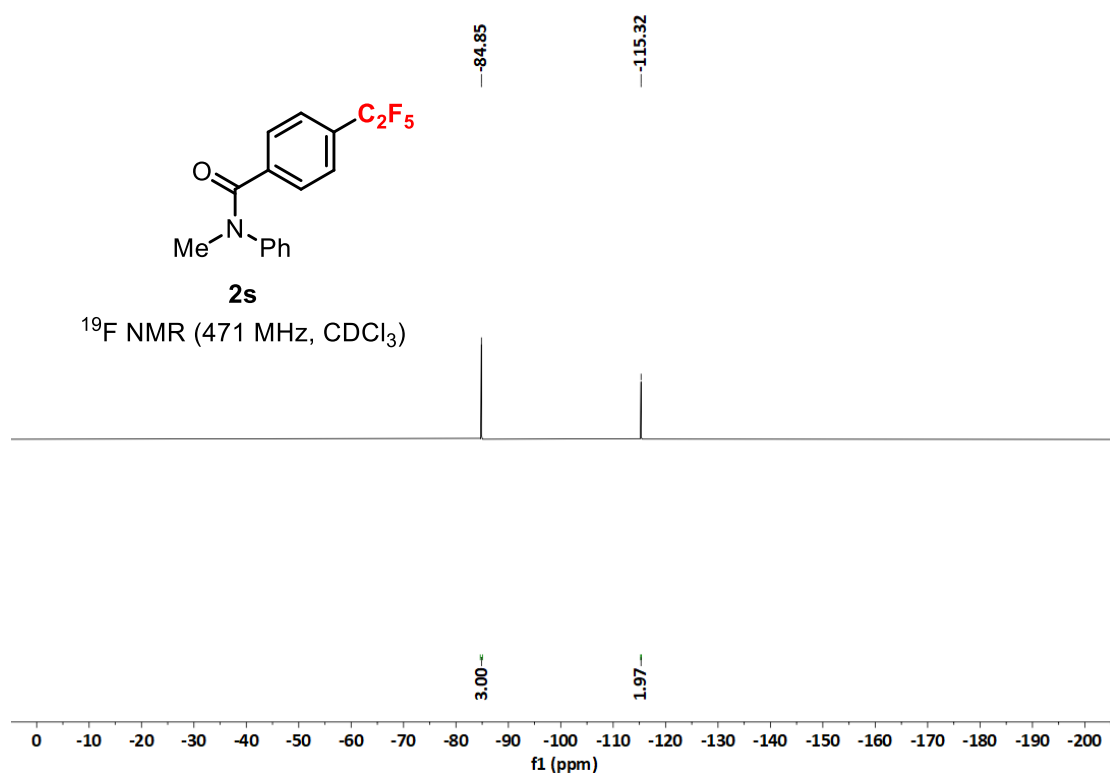

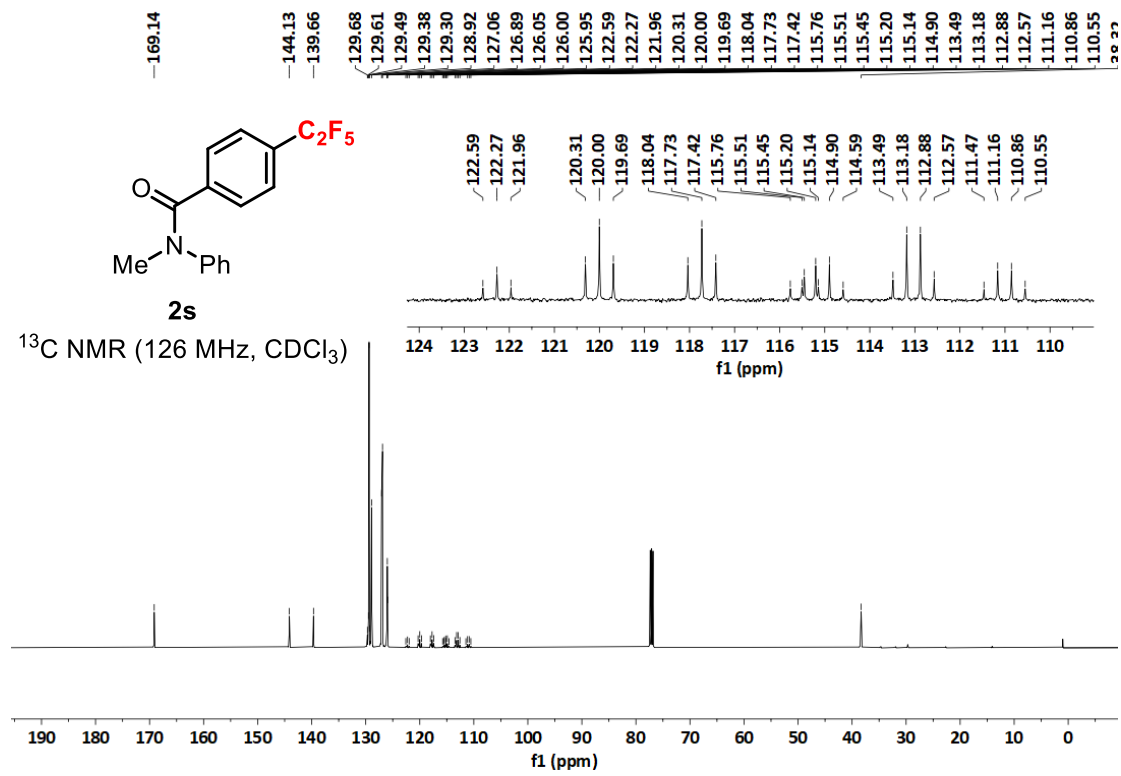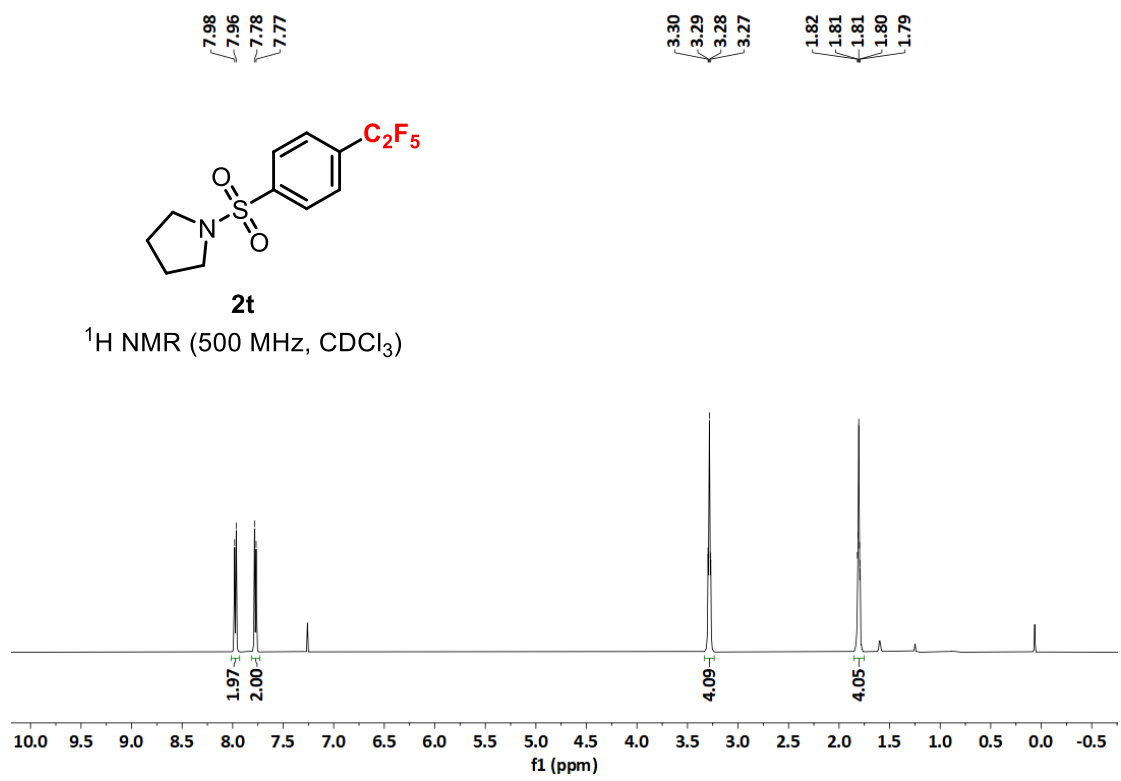

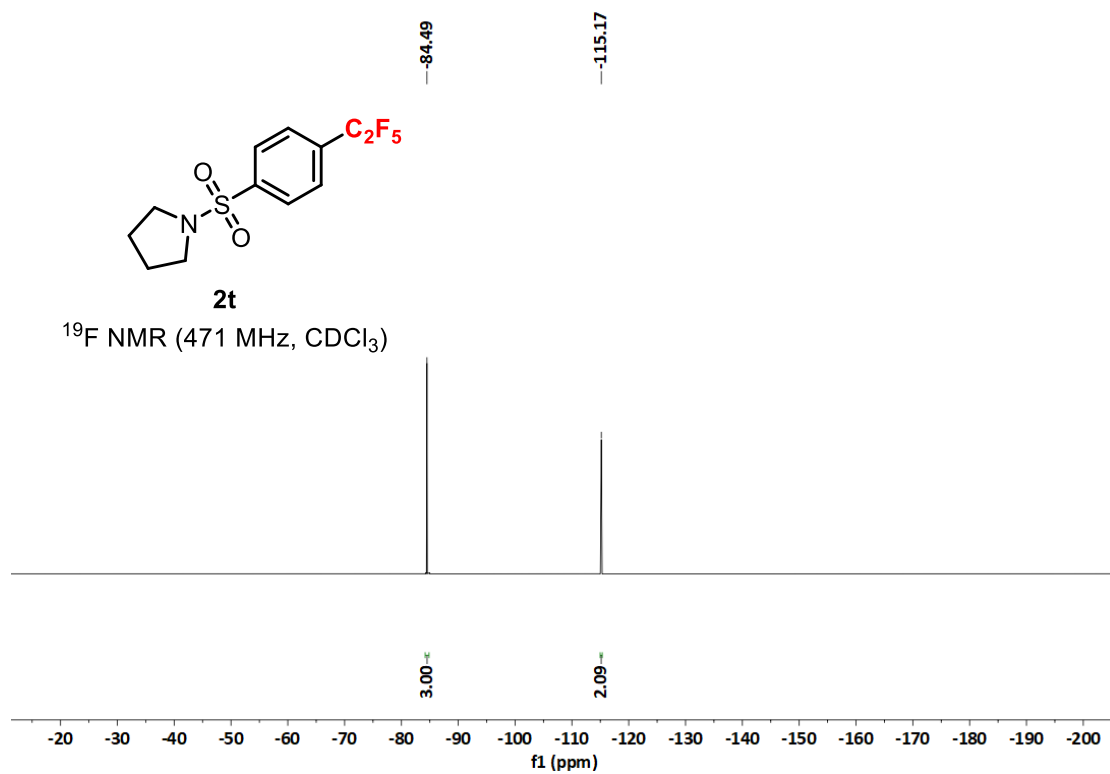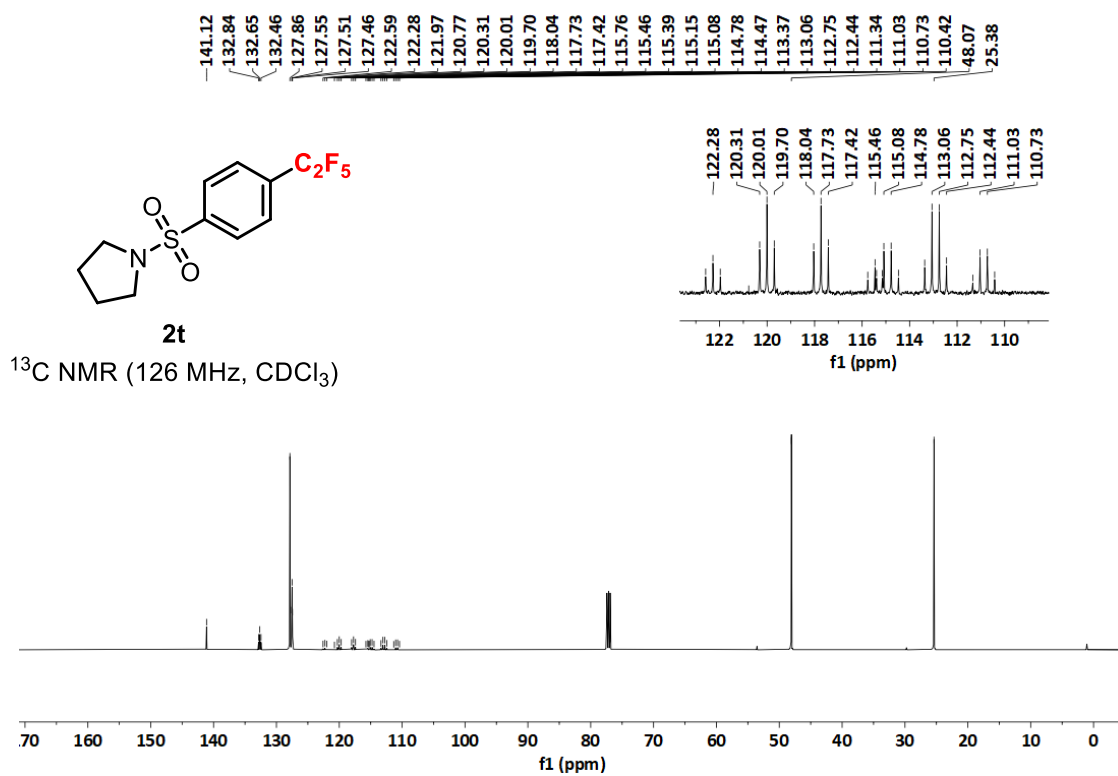

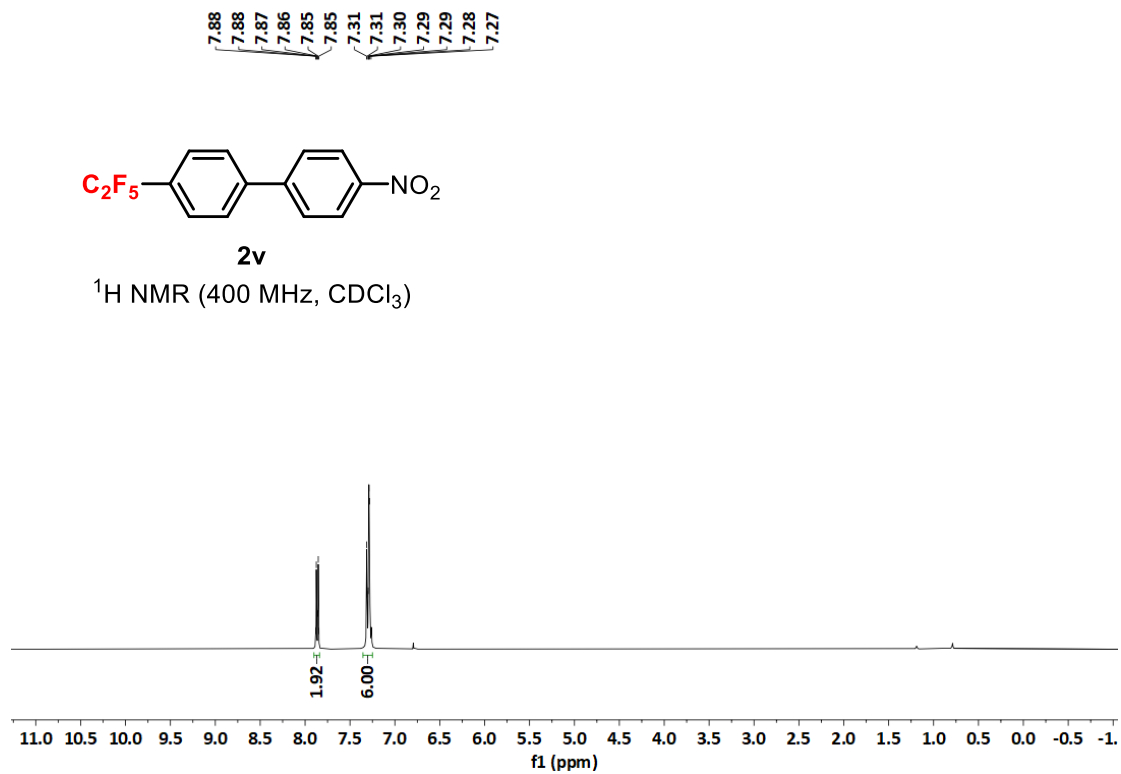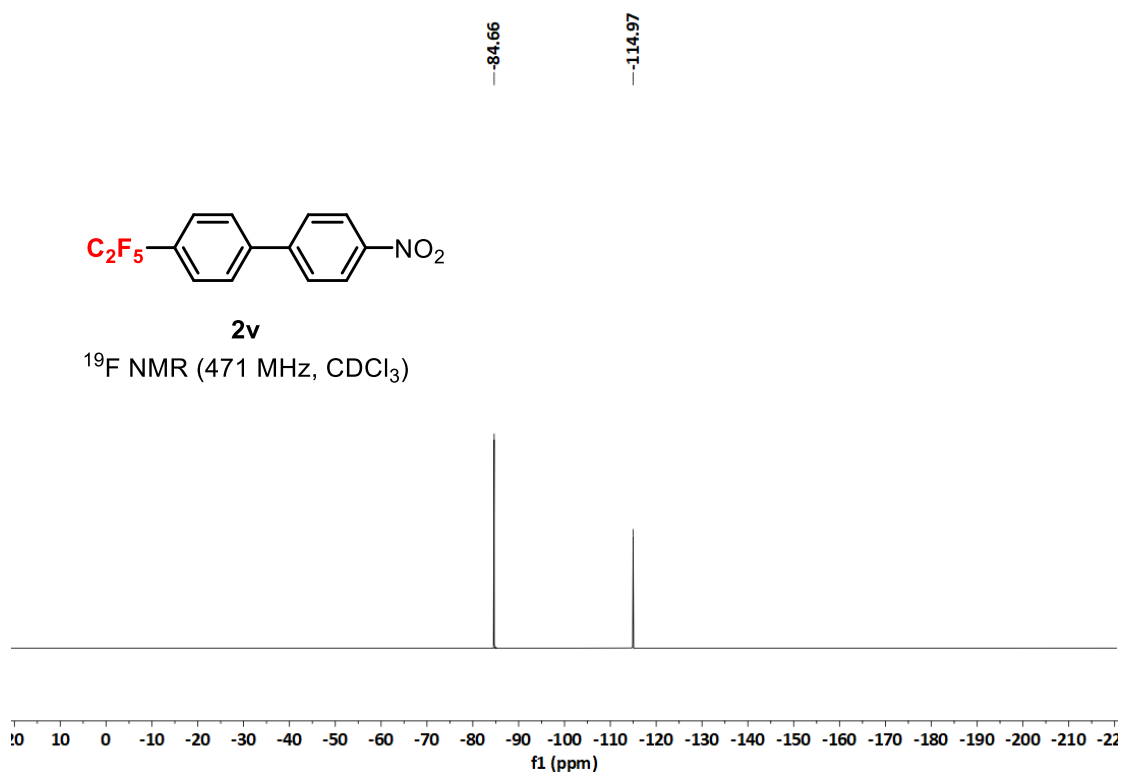

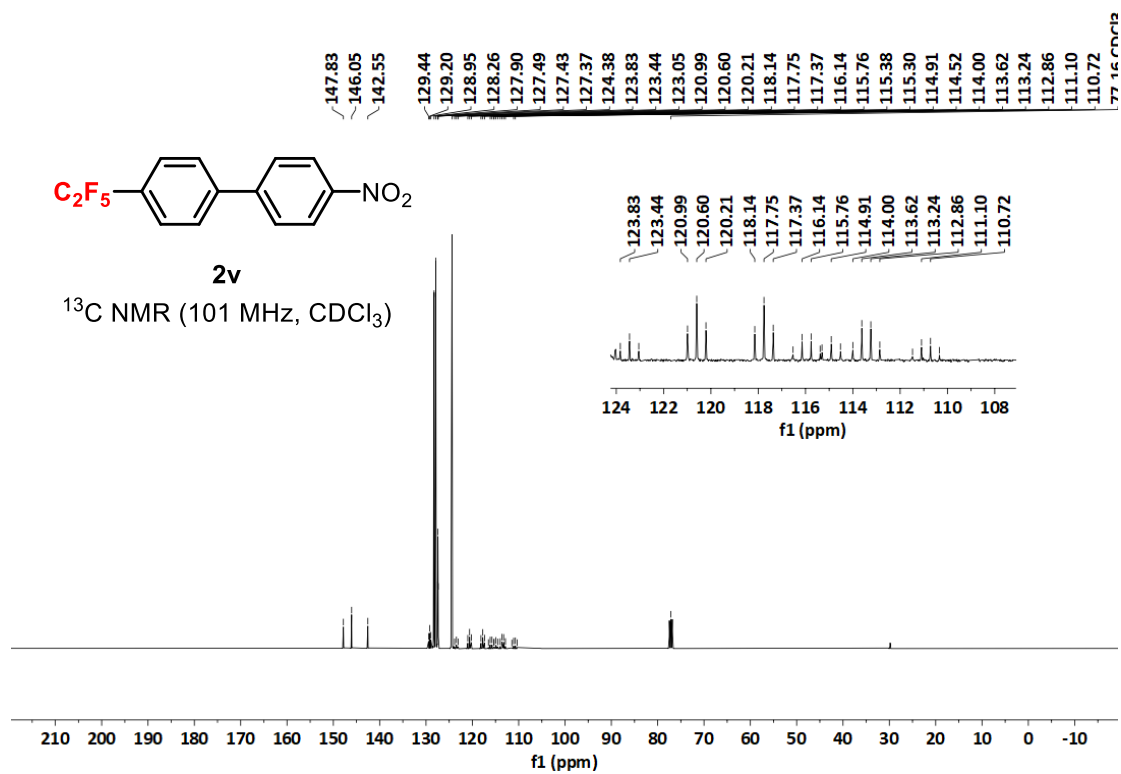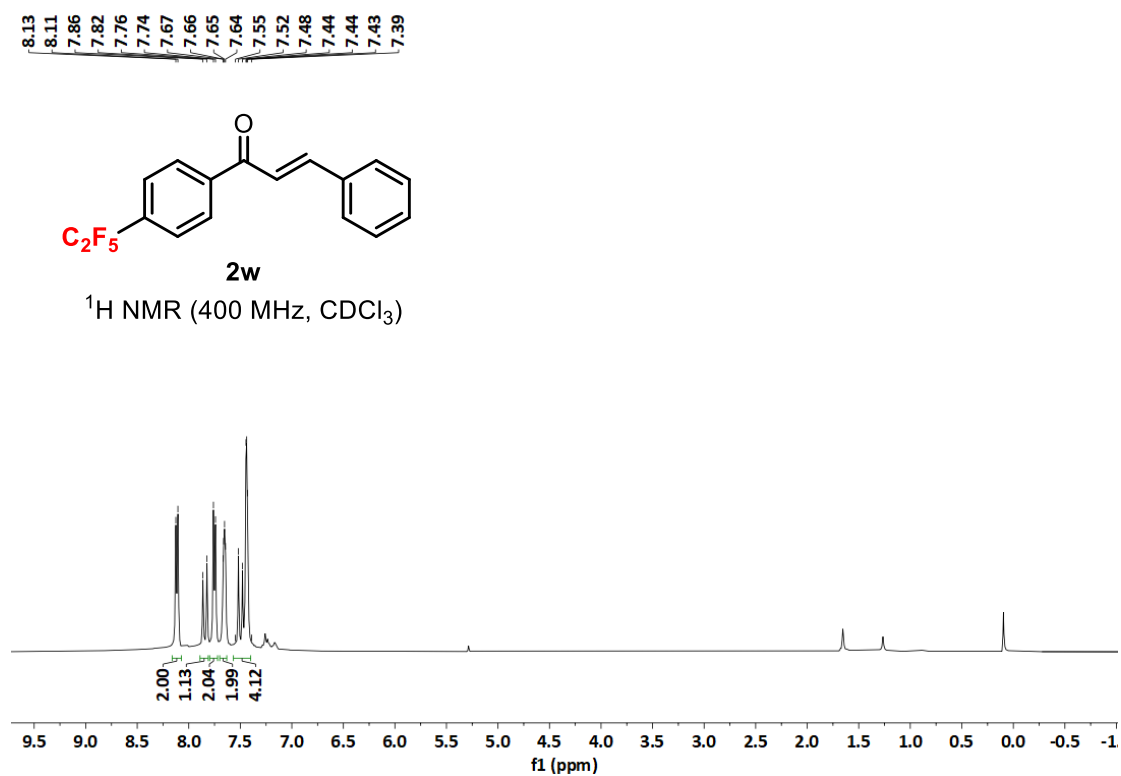

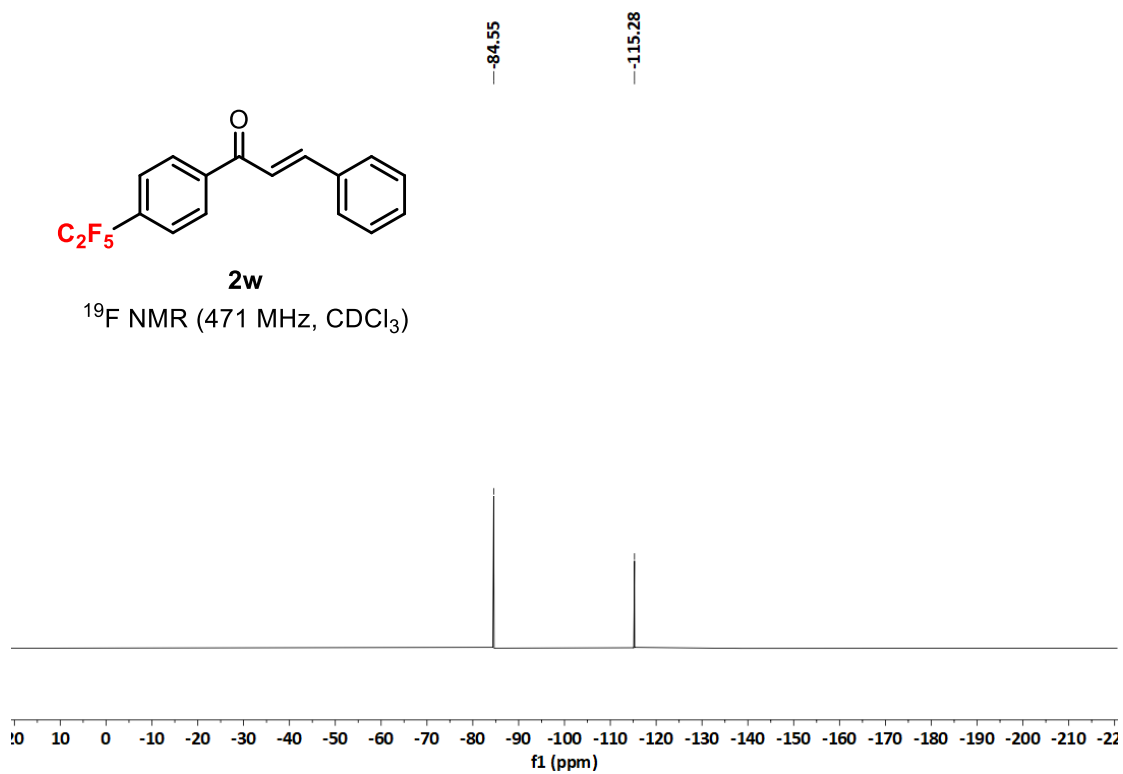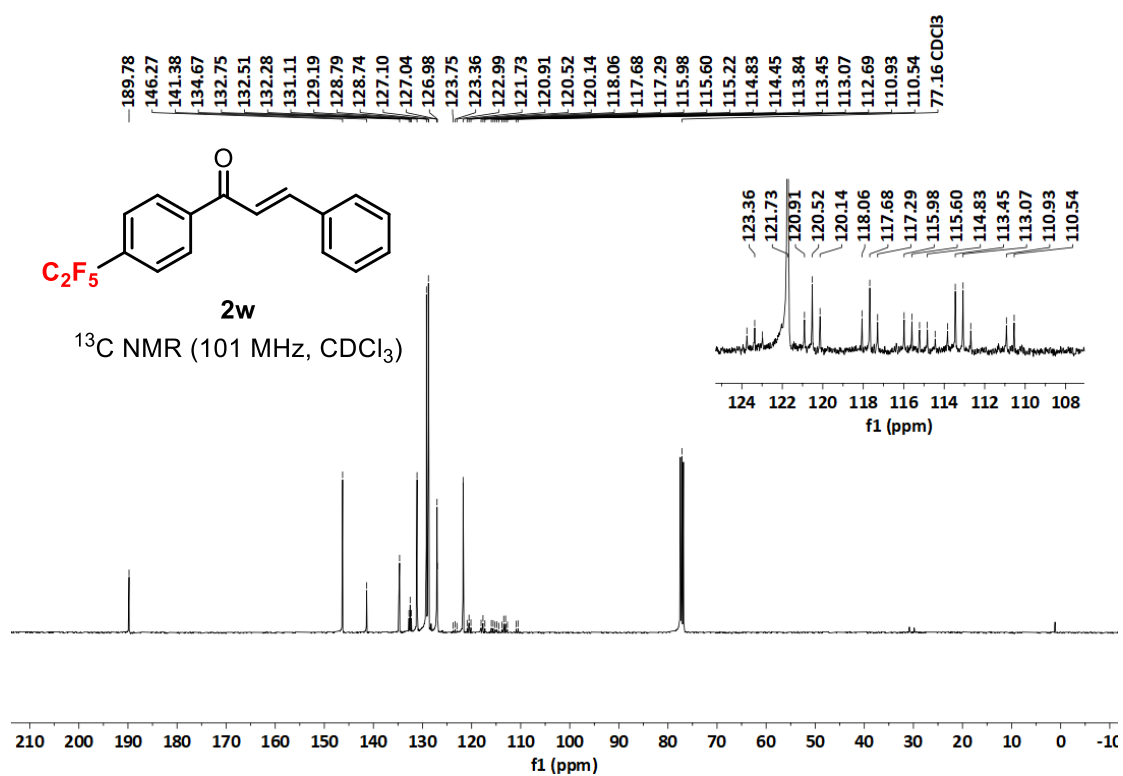

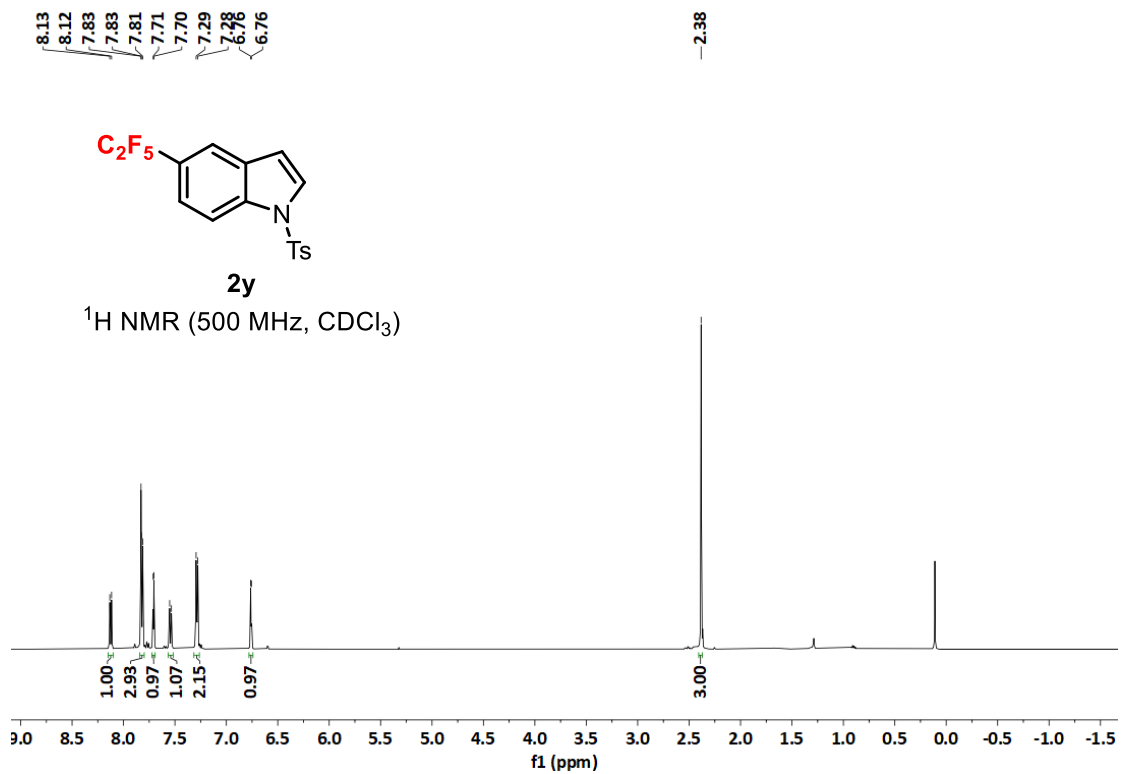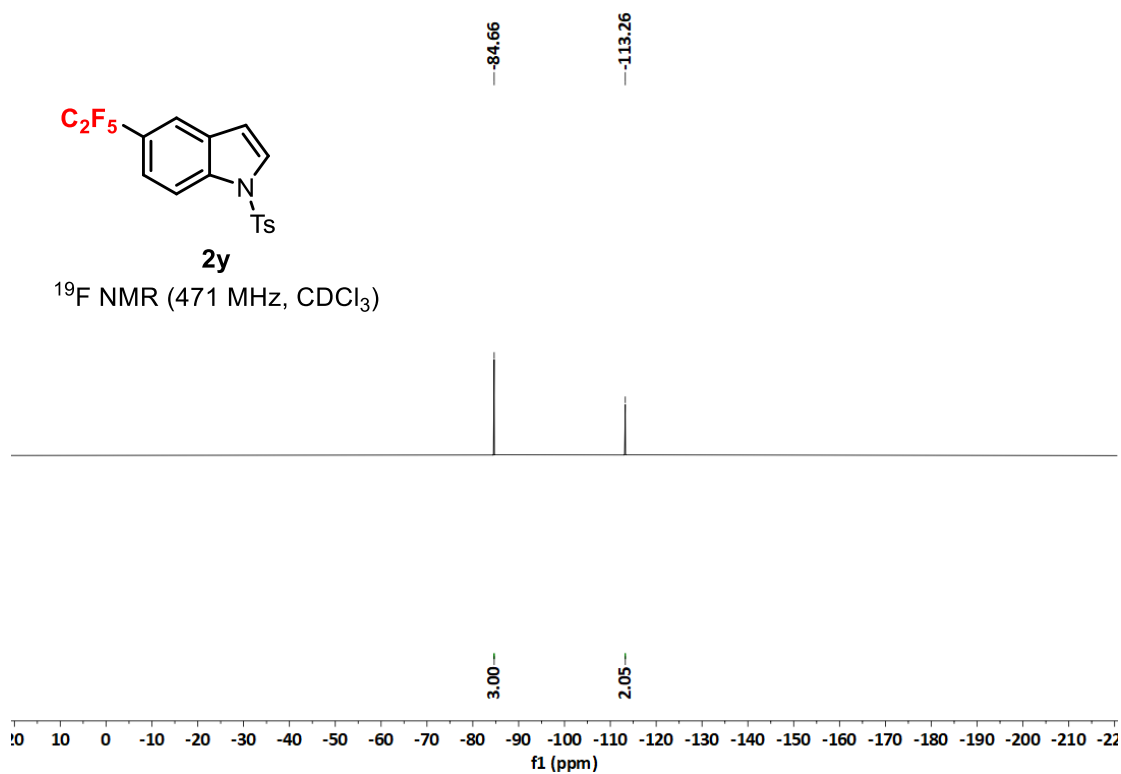

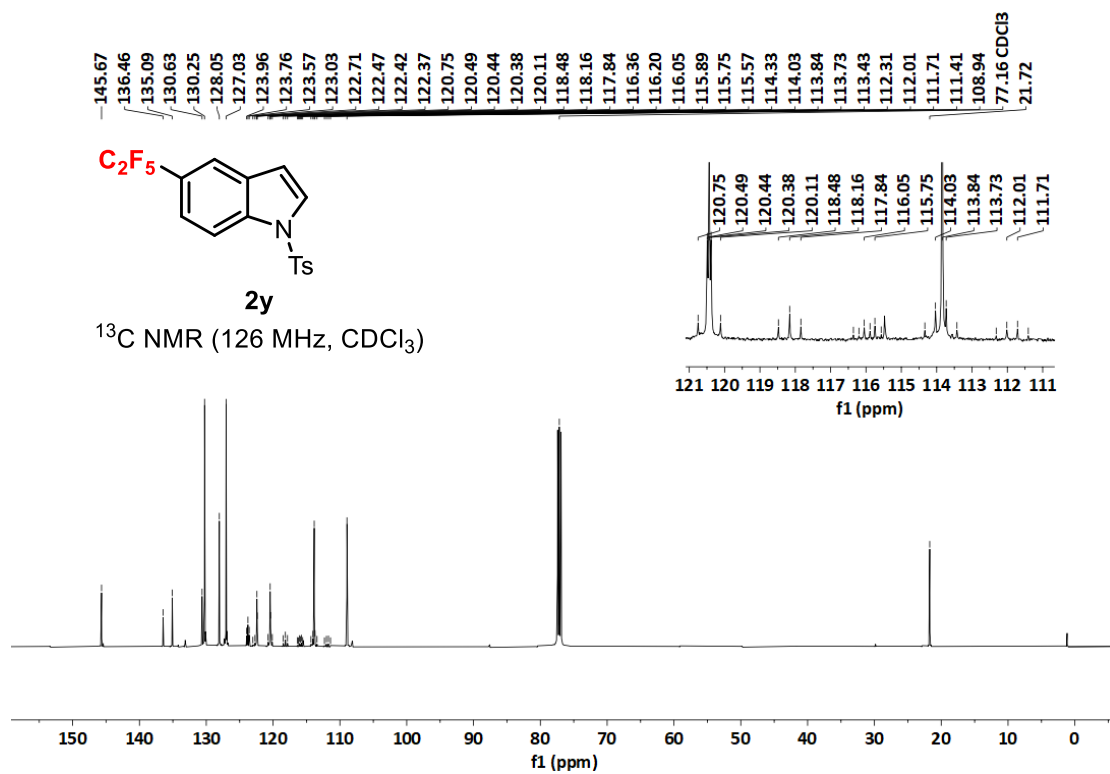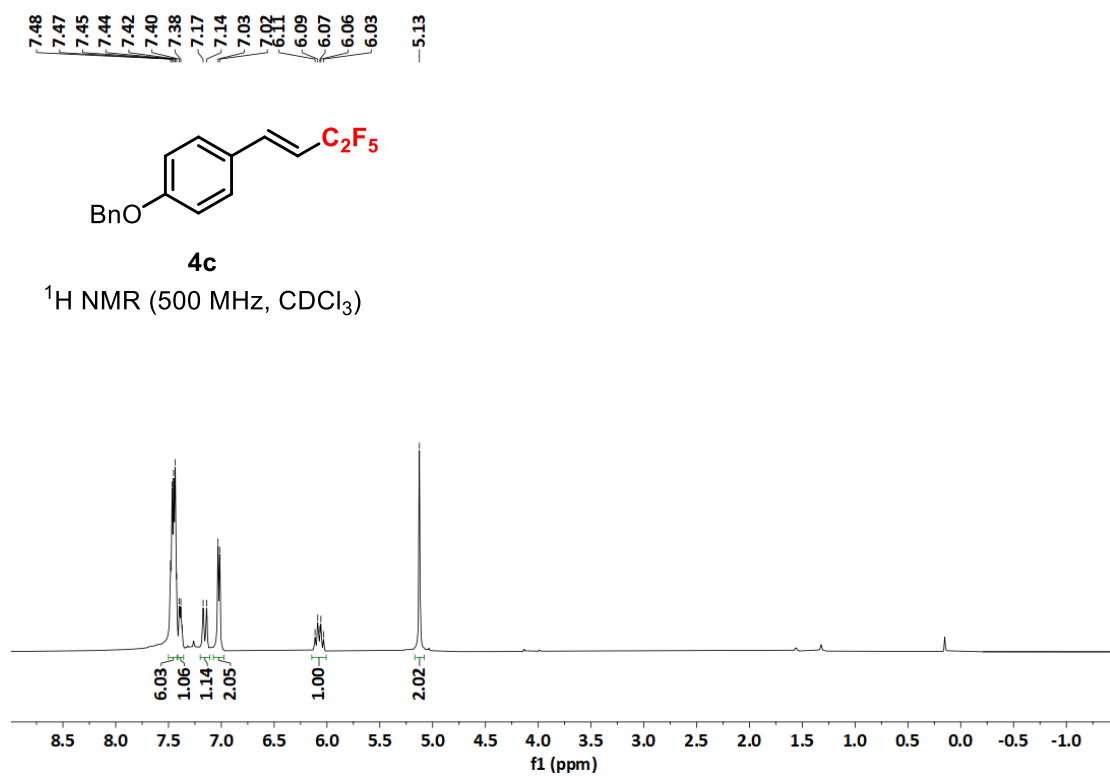



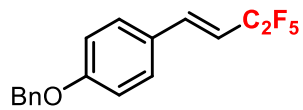

**4c**

$^{19}\text{F}$  NMR (471 MHz,  $\text{CDCl}_3$ )

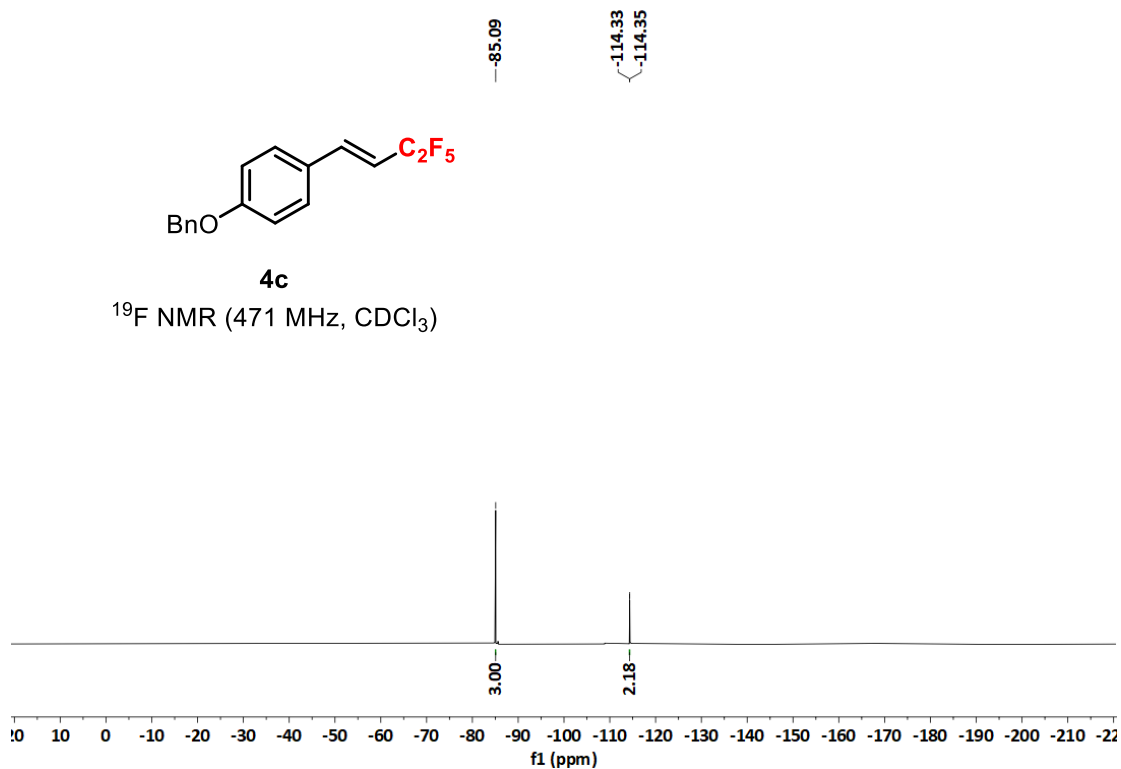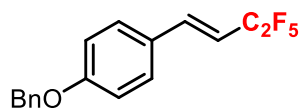

**4c**

$^{13}\text{C}$  NMR (126 MHz,  $\text{CDCl}_3$ )

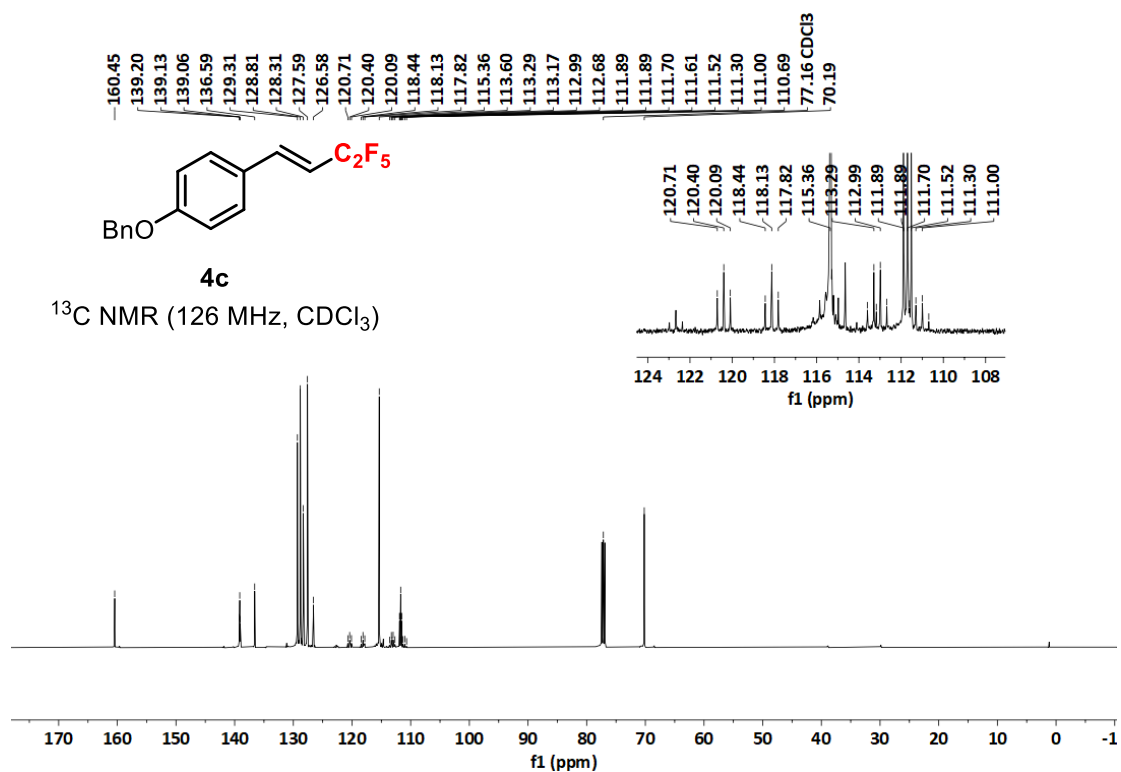

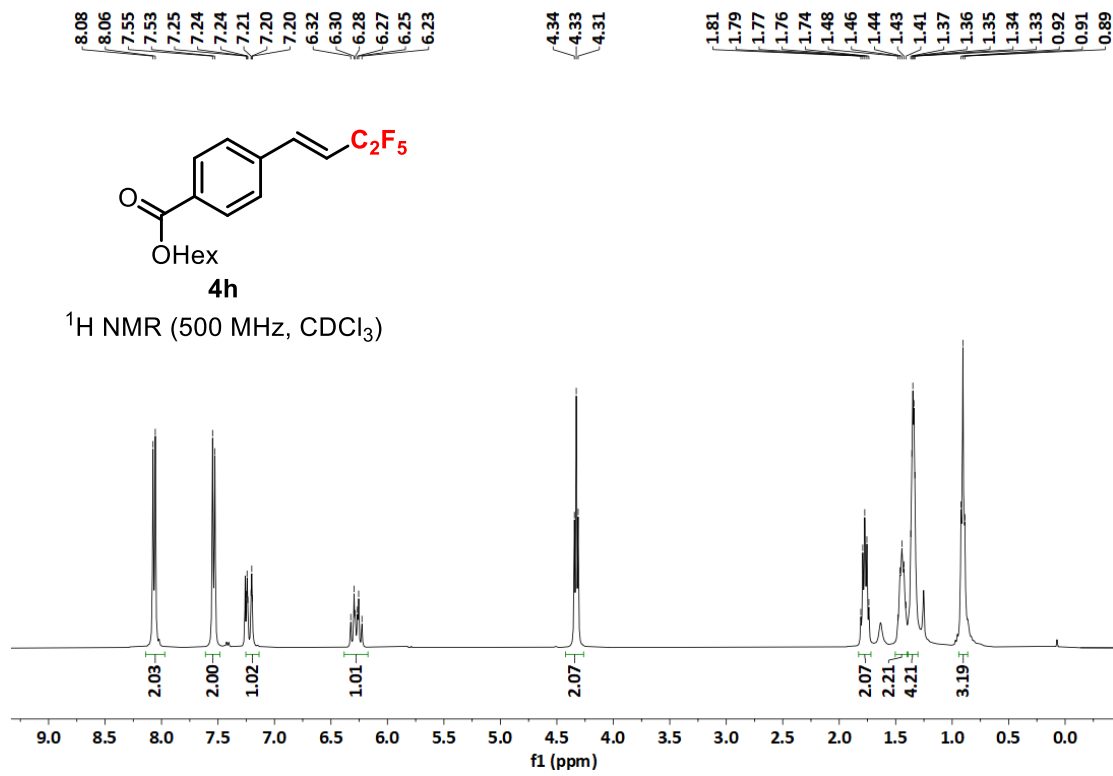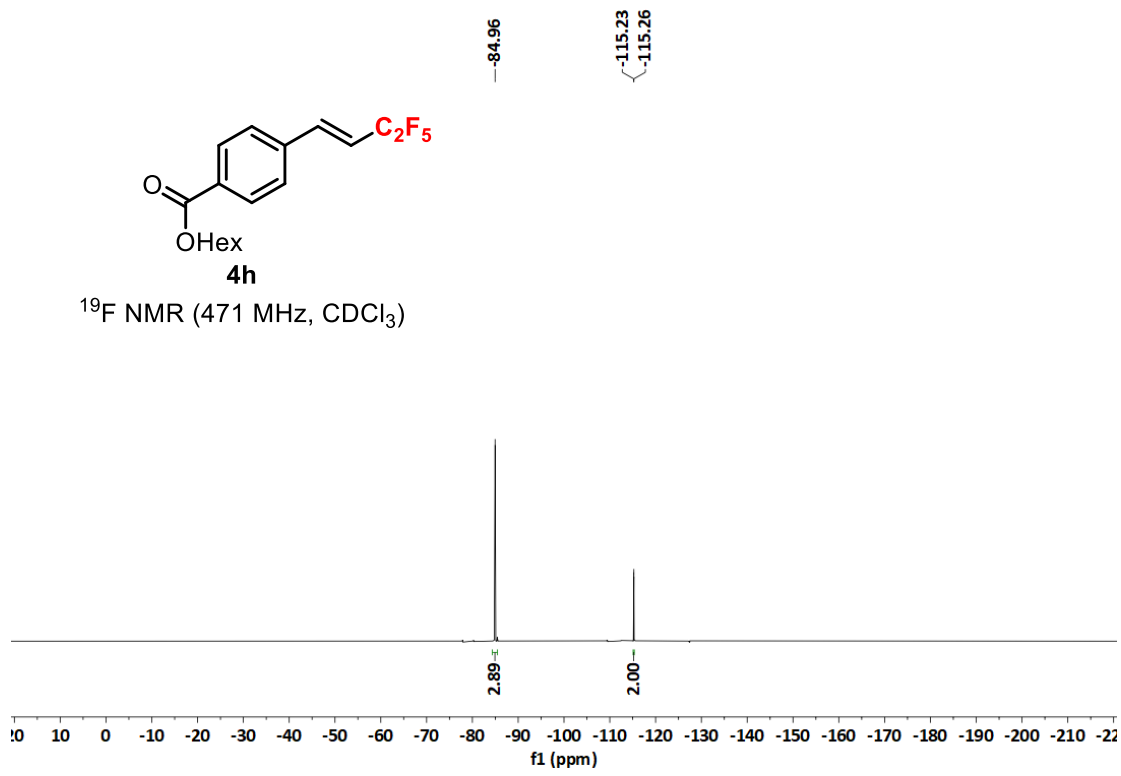

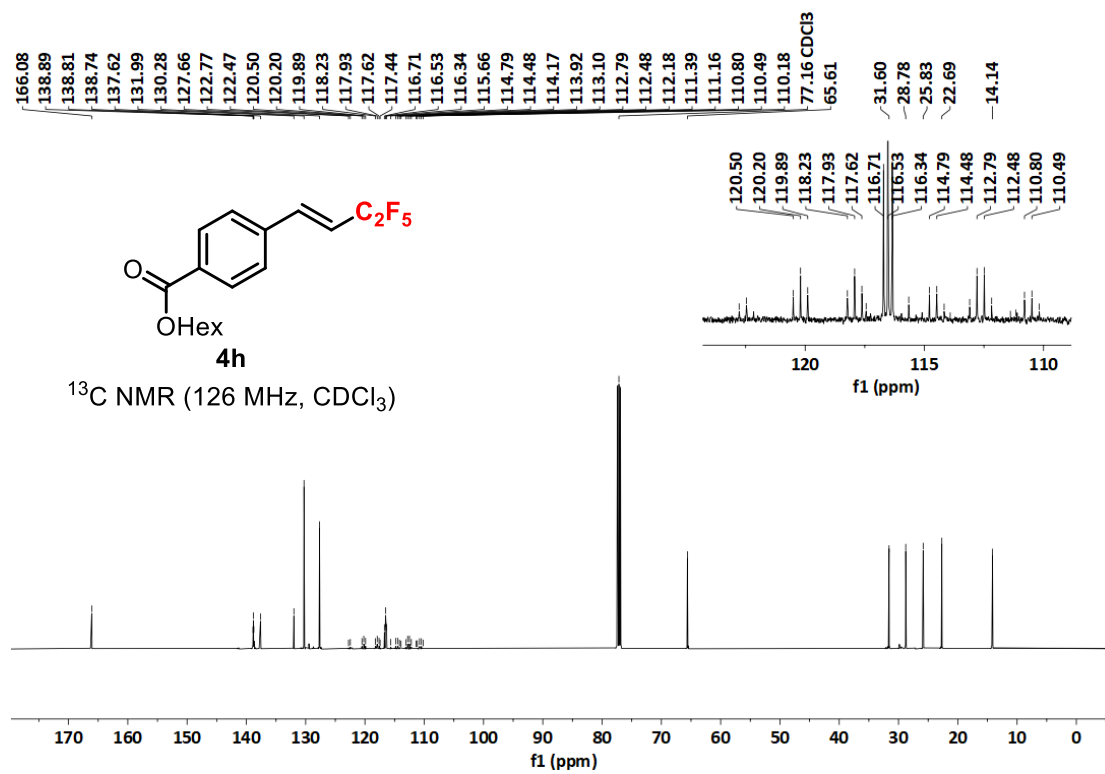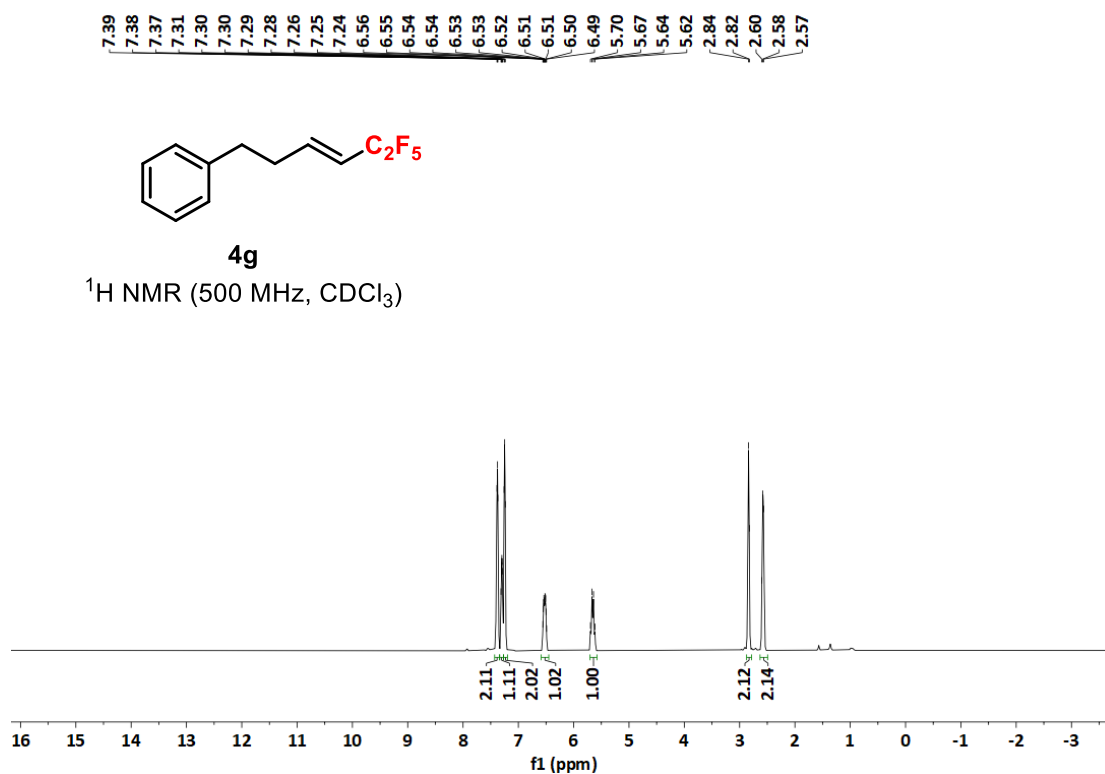

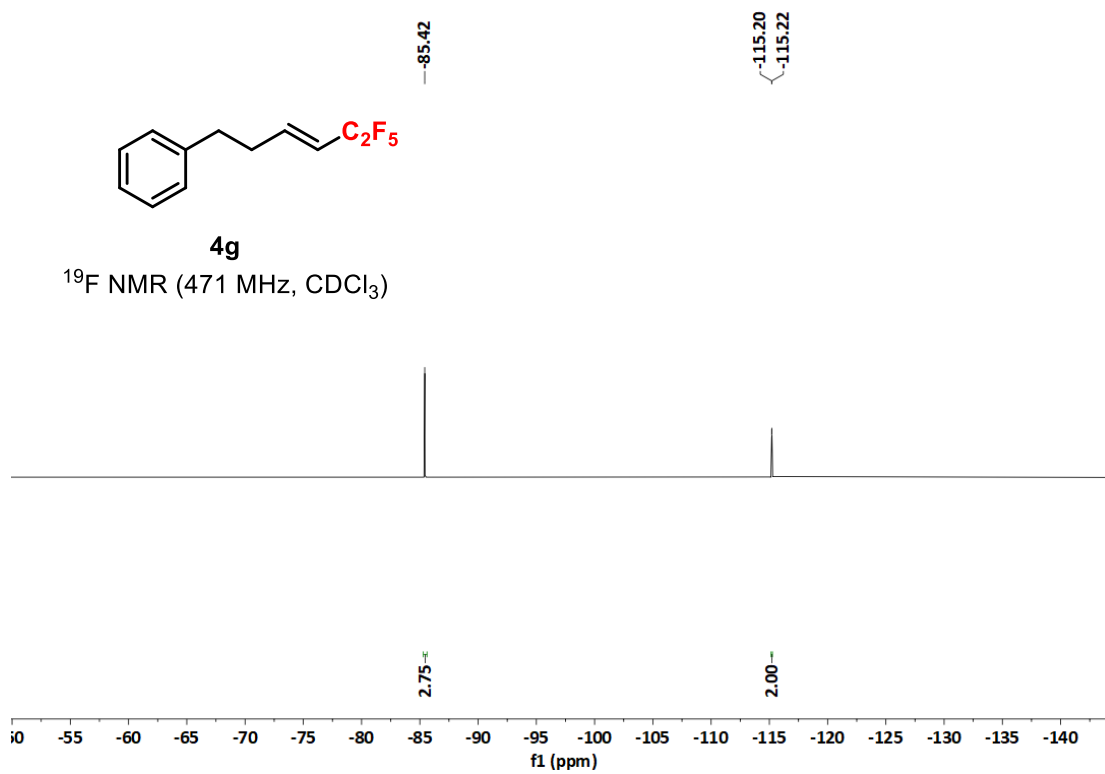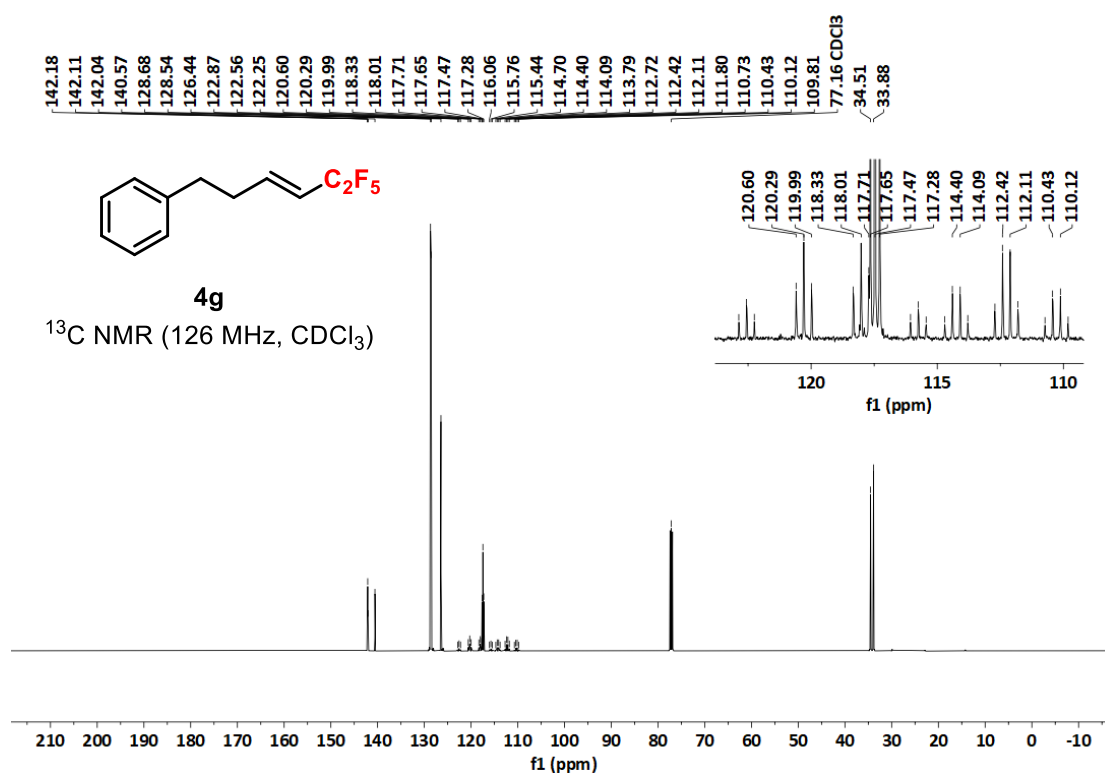

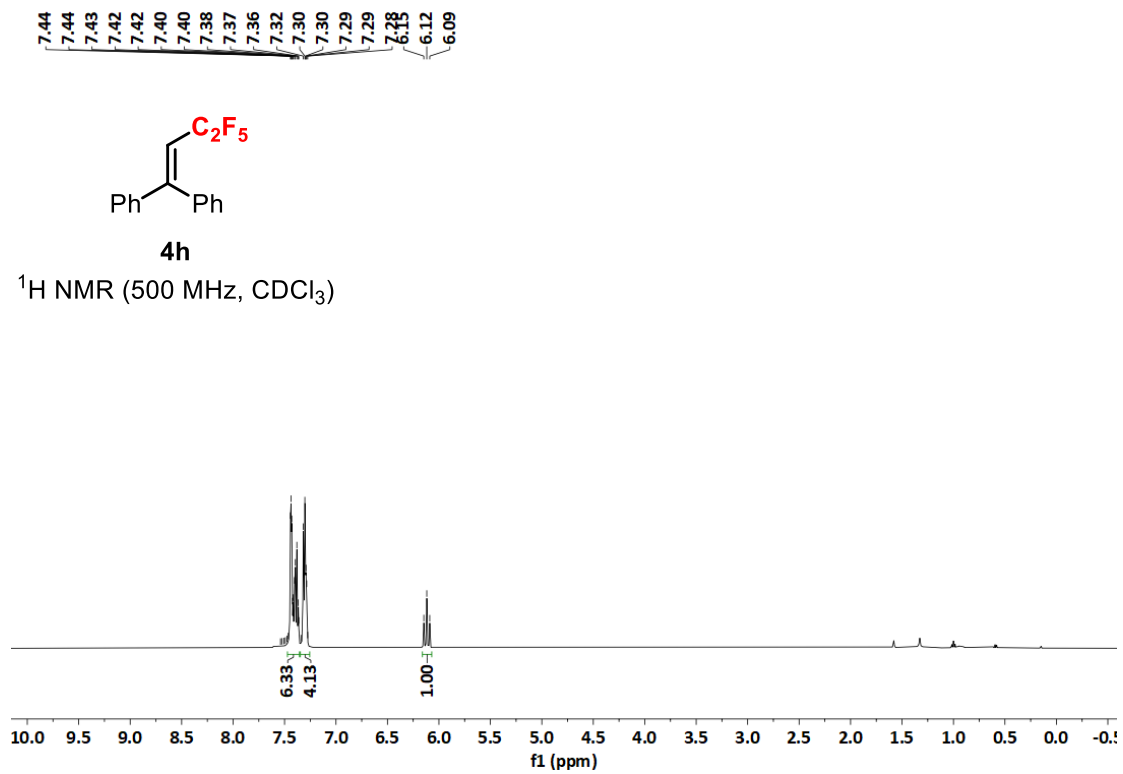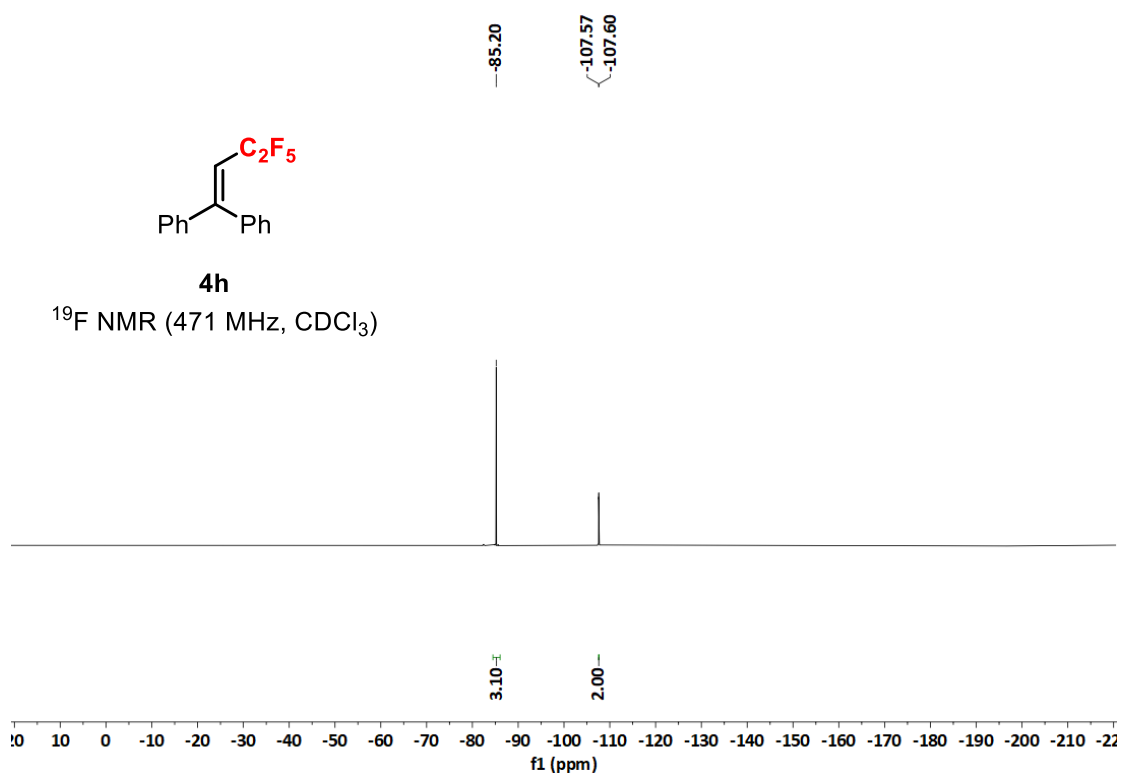

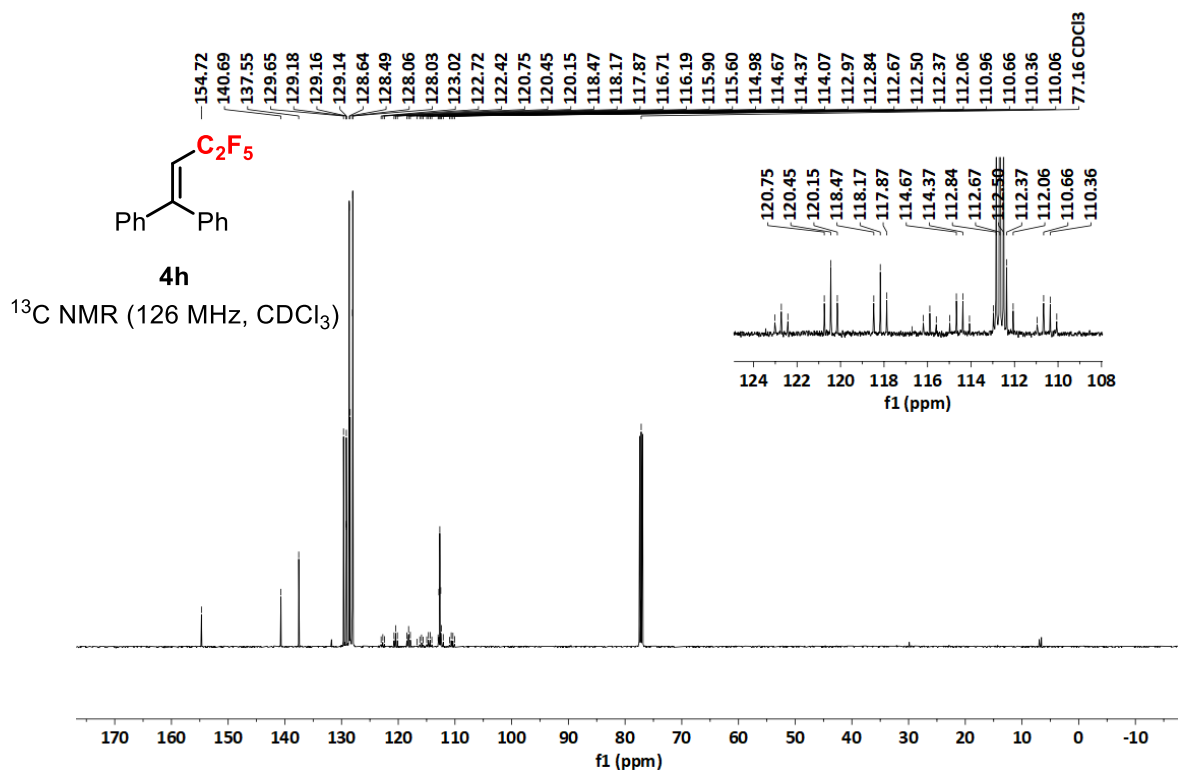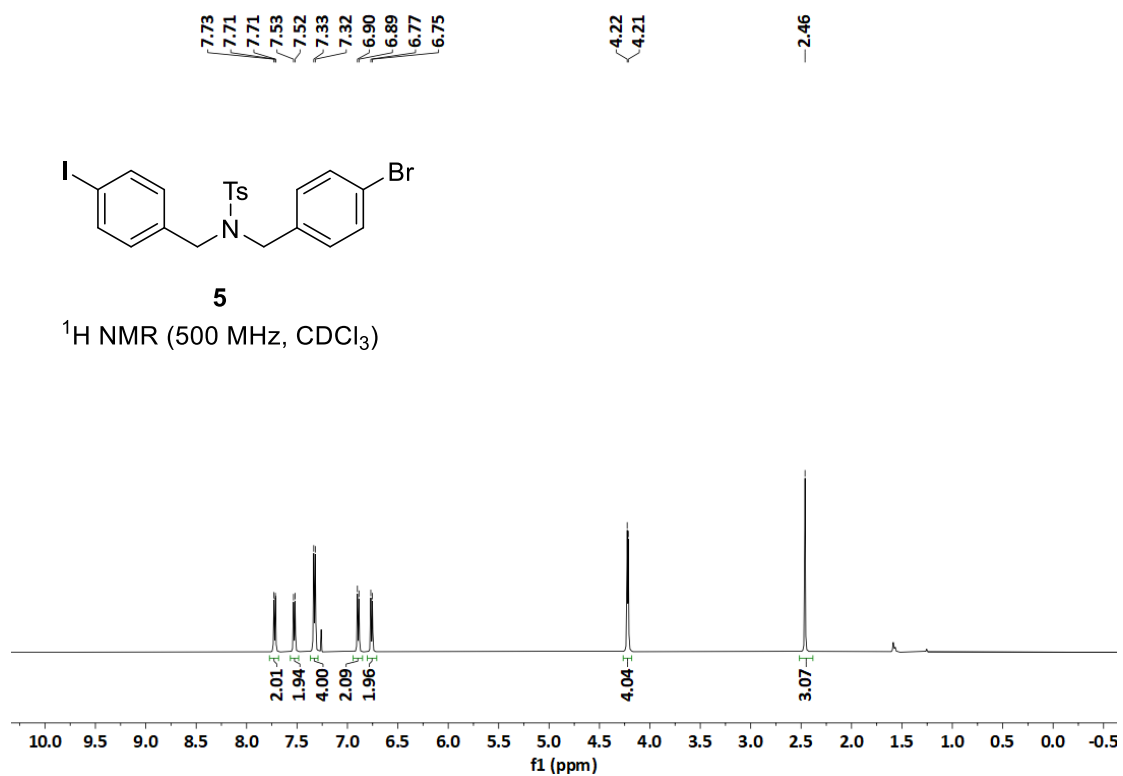

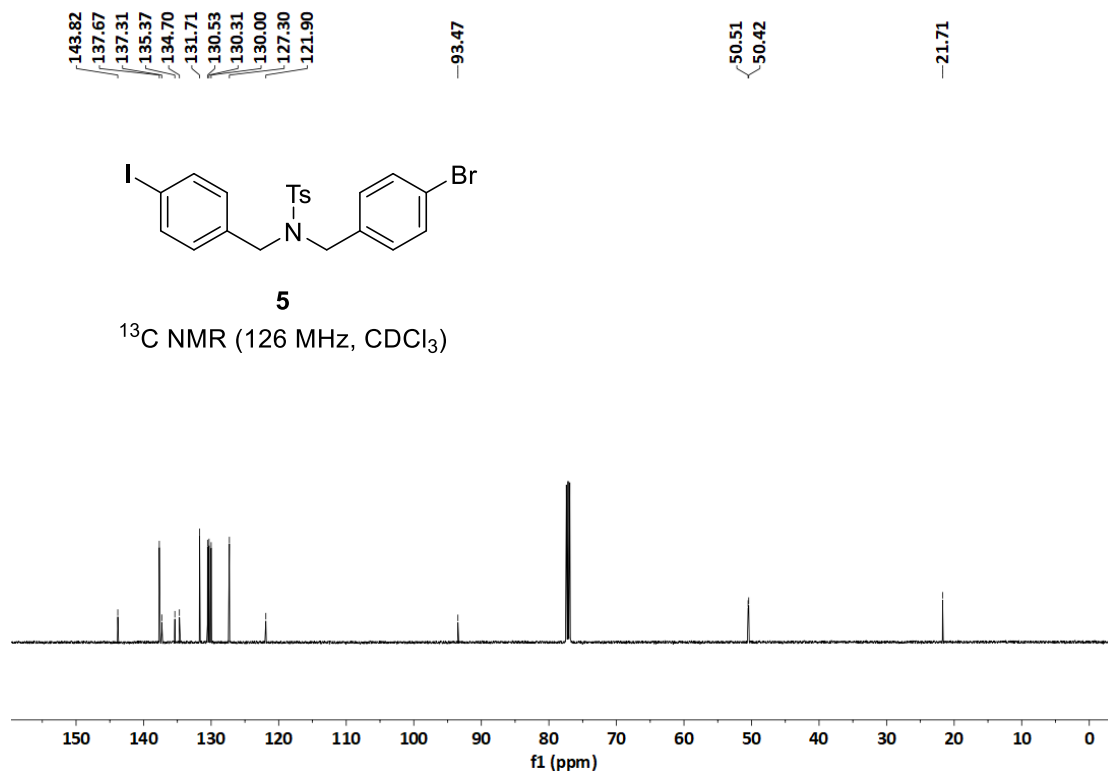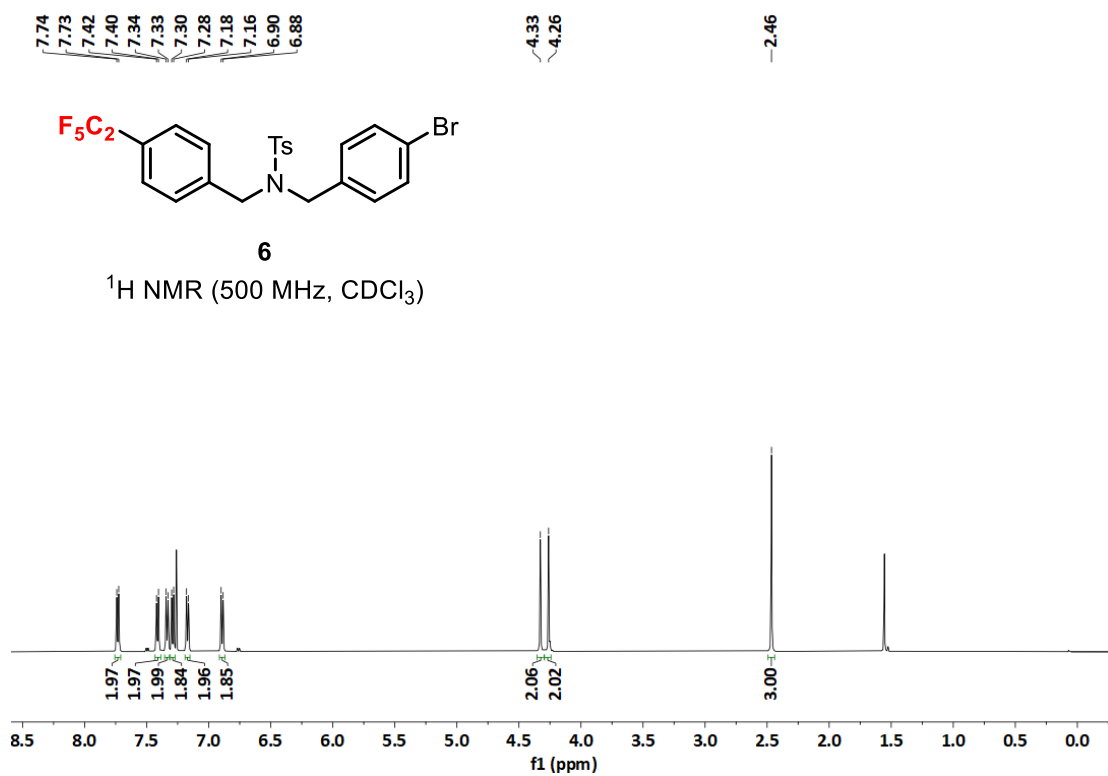

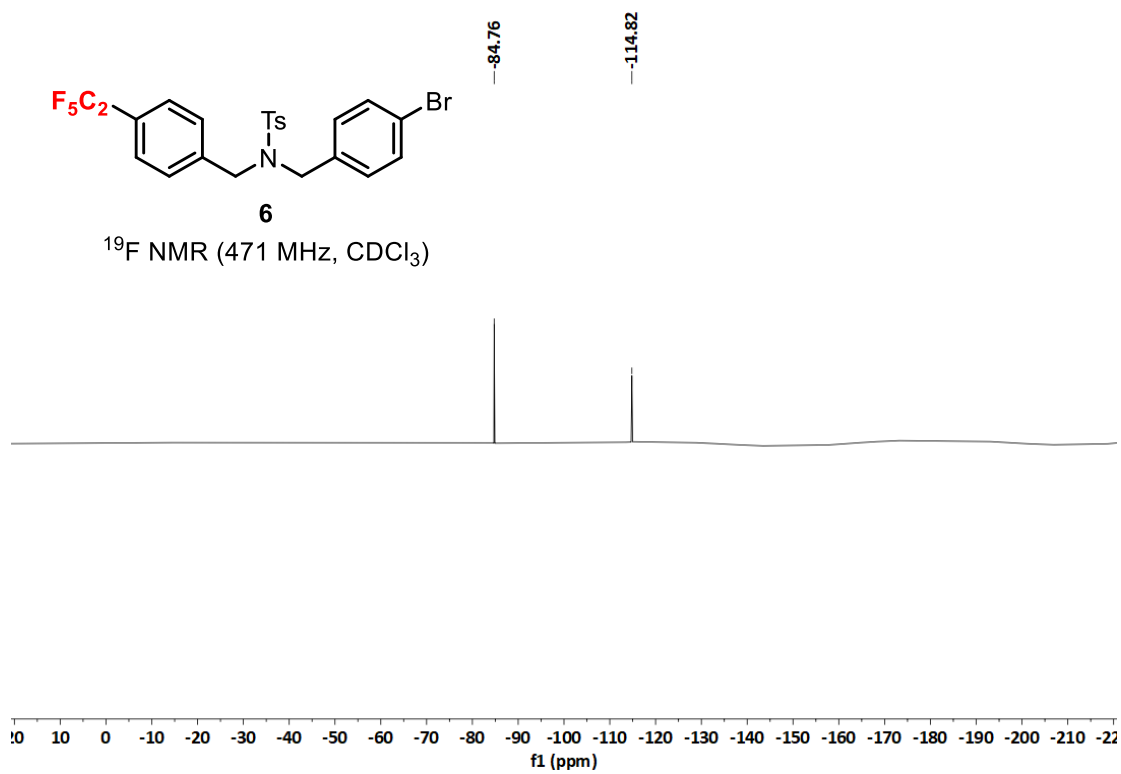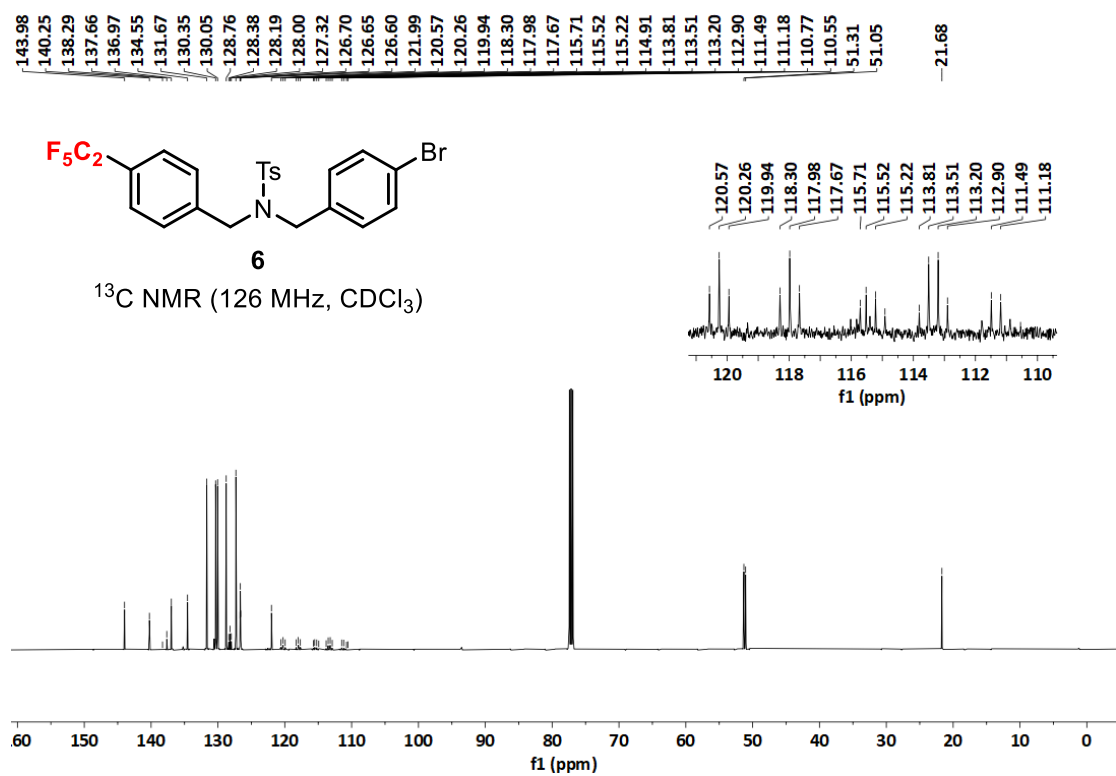



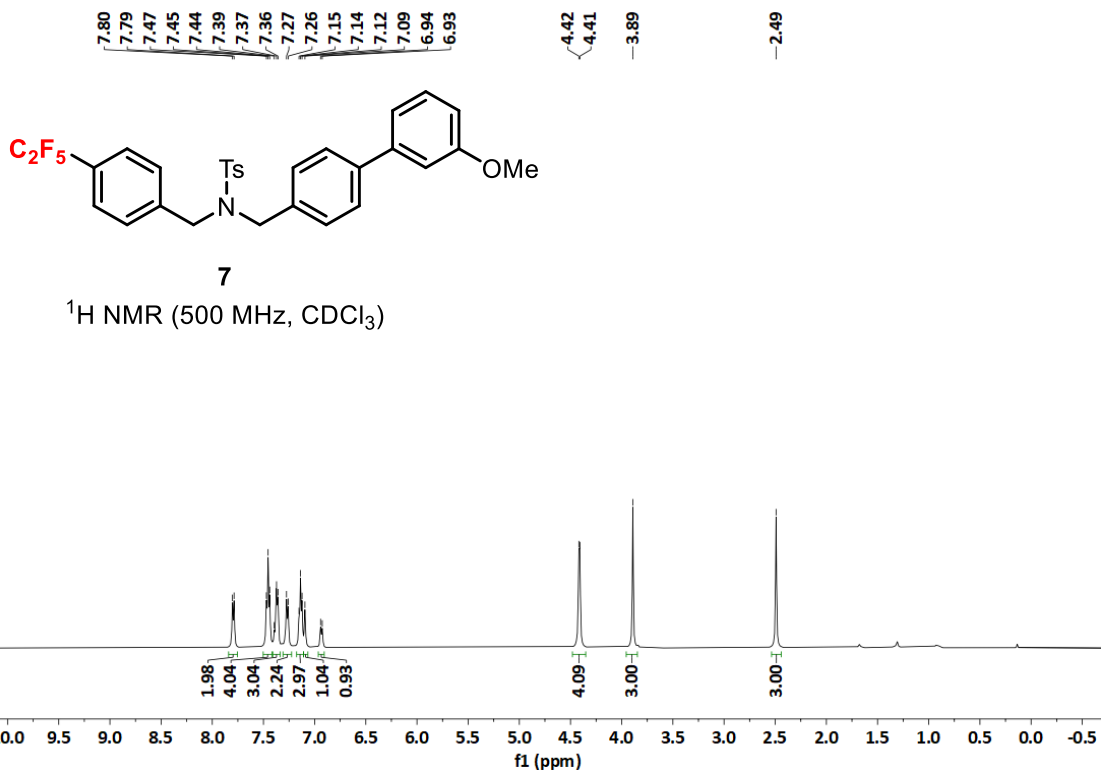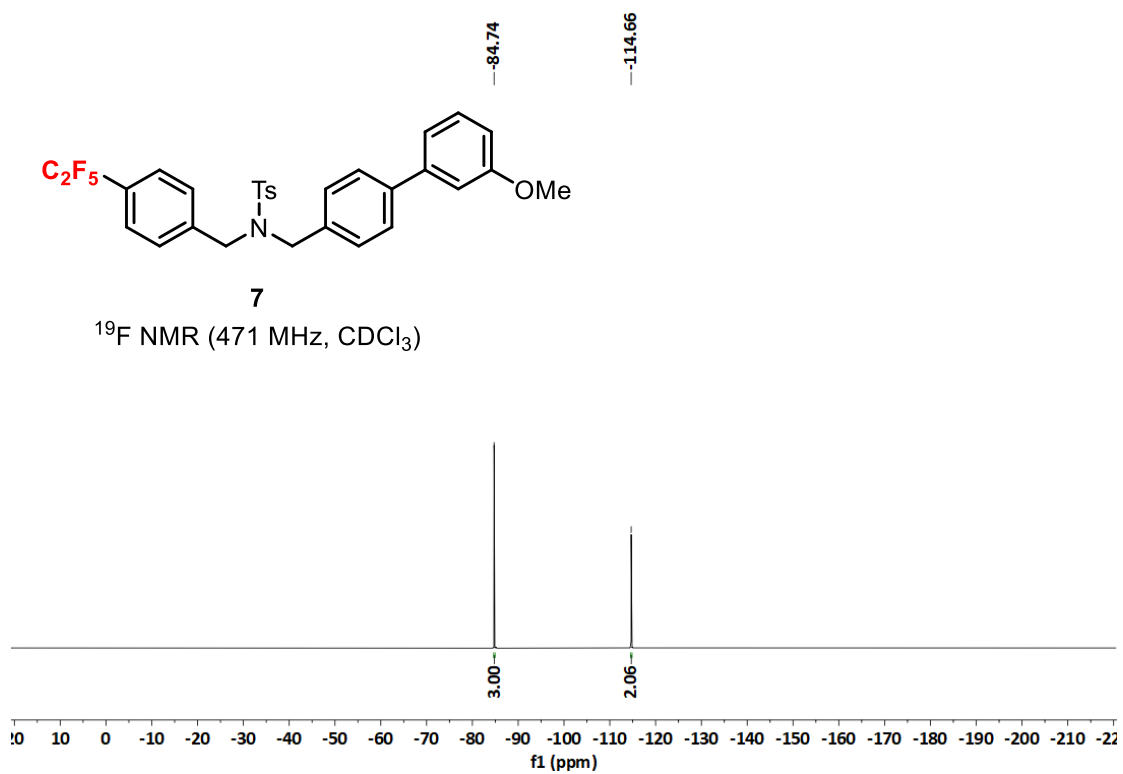

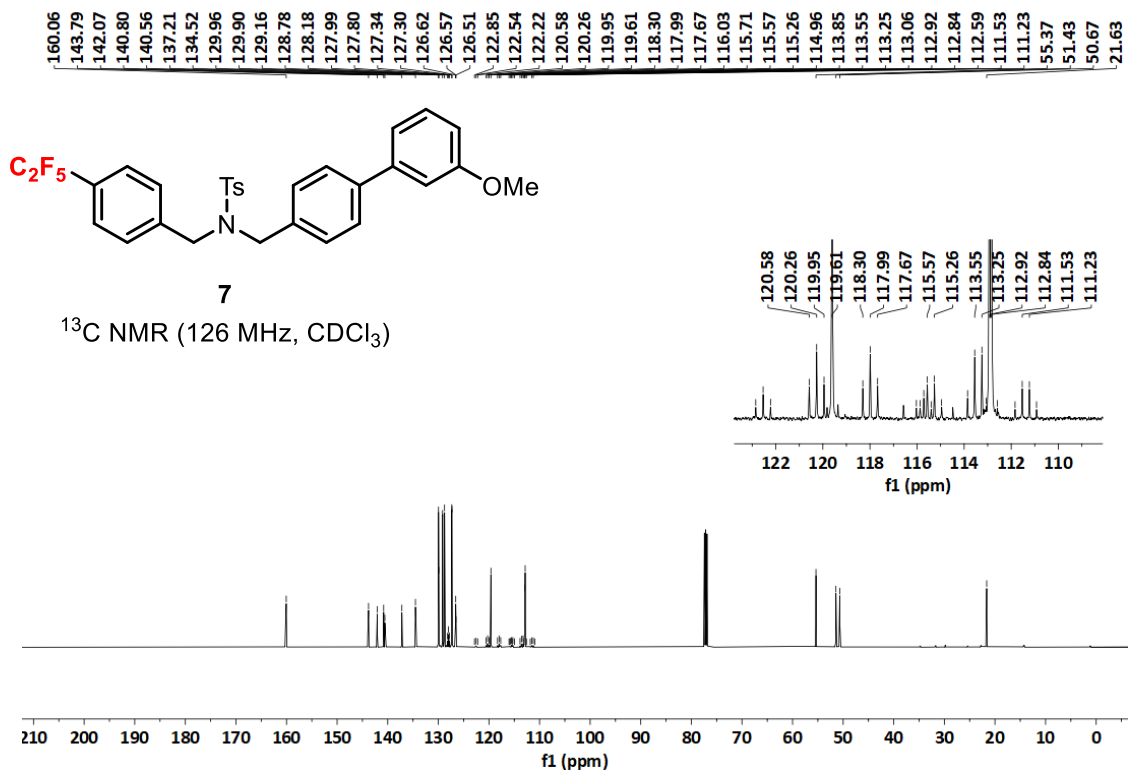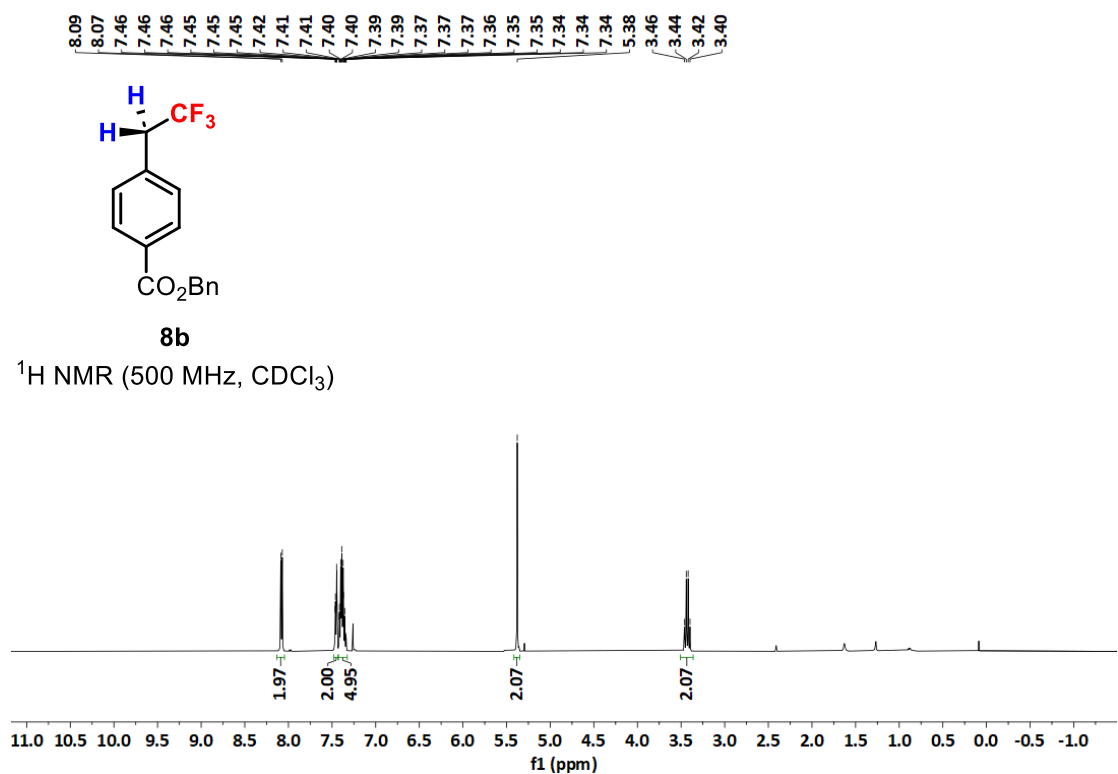

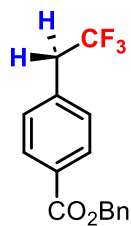

**8b**

$^{19}\text{F}$  NMR (471 MHz,  $\text{CDCl}_3$ )

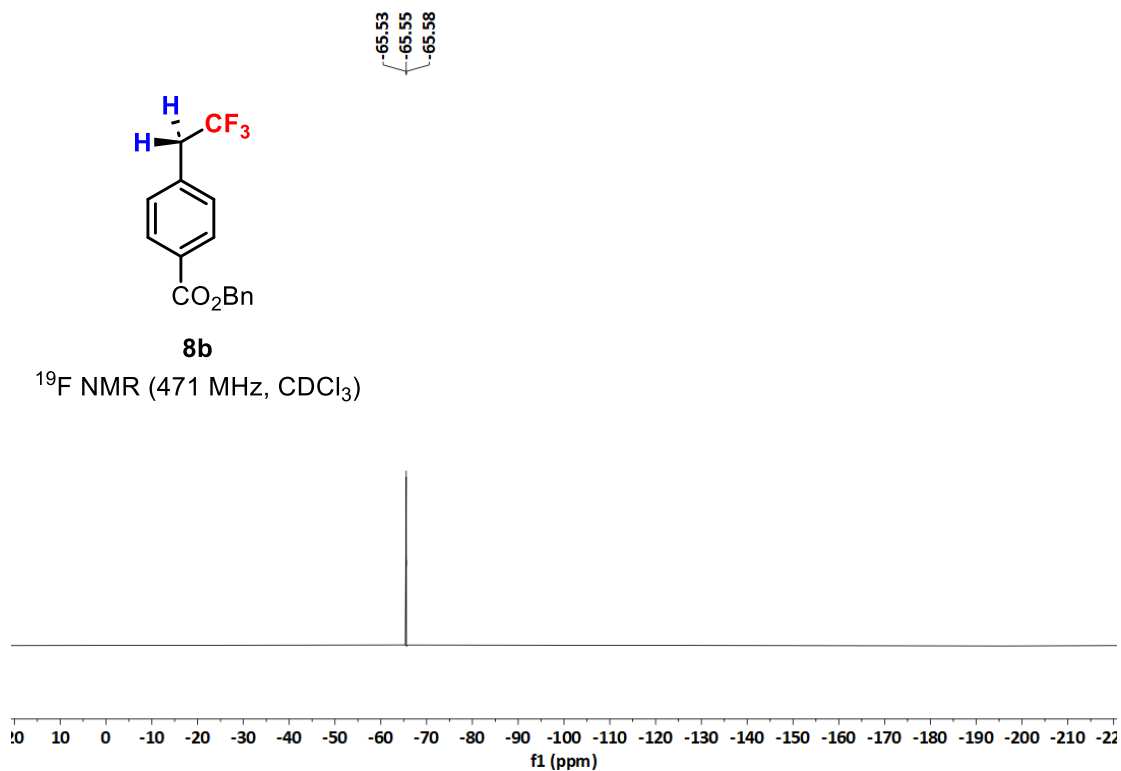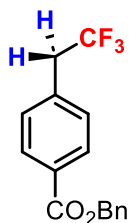

**8b**

$^{13}\text{C}$  NMR (126 MHz,  $\text{CDCl}_3$ )

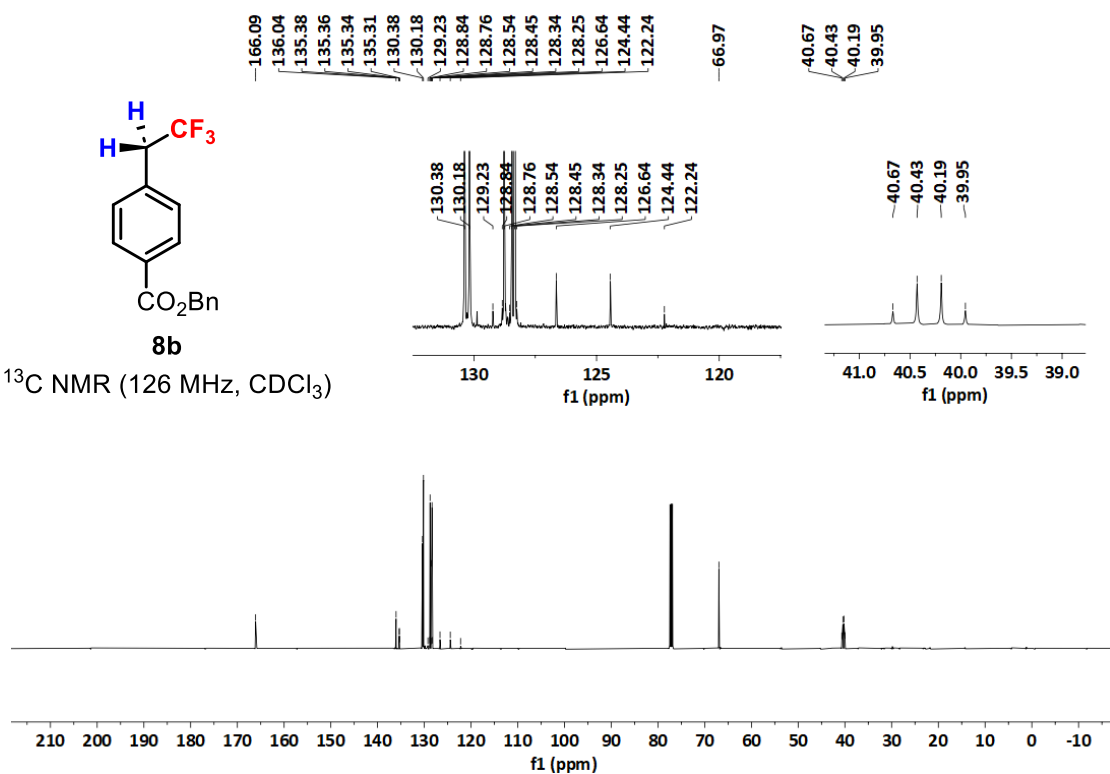

7.98  
7.98  
7.96  
7.96  
7.52  
7.51  
7.50  
7.50  
7.49  
7.48  
7.43  
7.42  
7.41  
7.41  
7.40  
7.39  
7.37  
7.36

4.40  
4.39  
4.37  
4.36  
4.03  
4.01  
3.99  
3.97

1.41  
1.40  
1.38

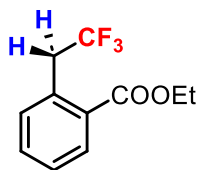

**8d**

<sup>1</sup>H NMR (500 MHz, CDCl<sub>3</sub>)

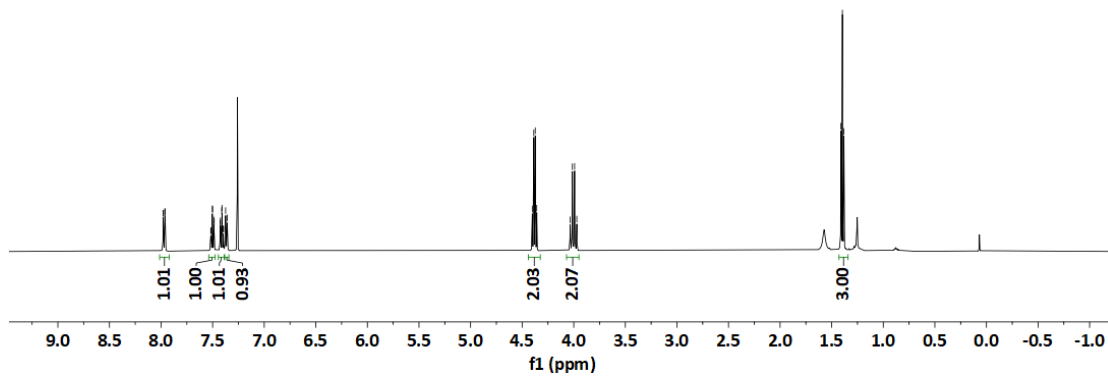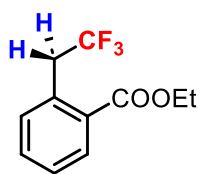

**8d**

<sup>19</sup>F NMR (471 MHz, CDCl<sub>3</sub>)

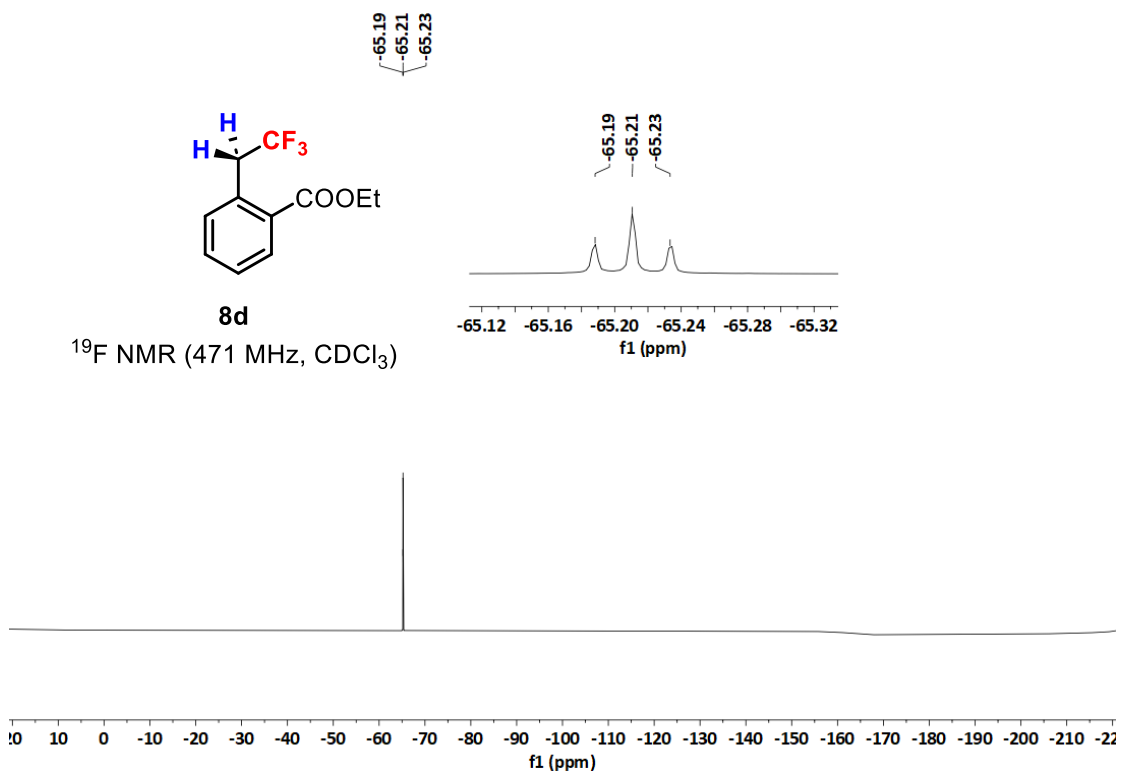

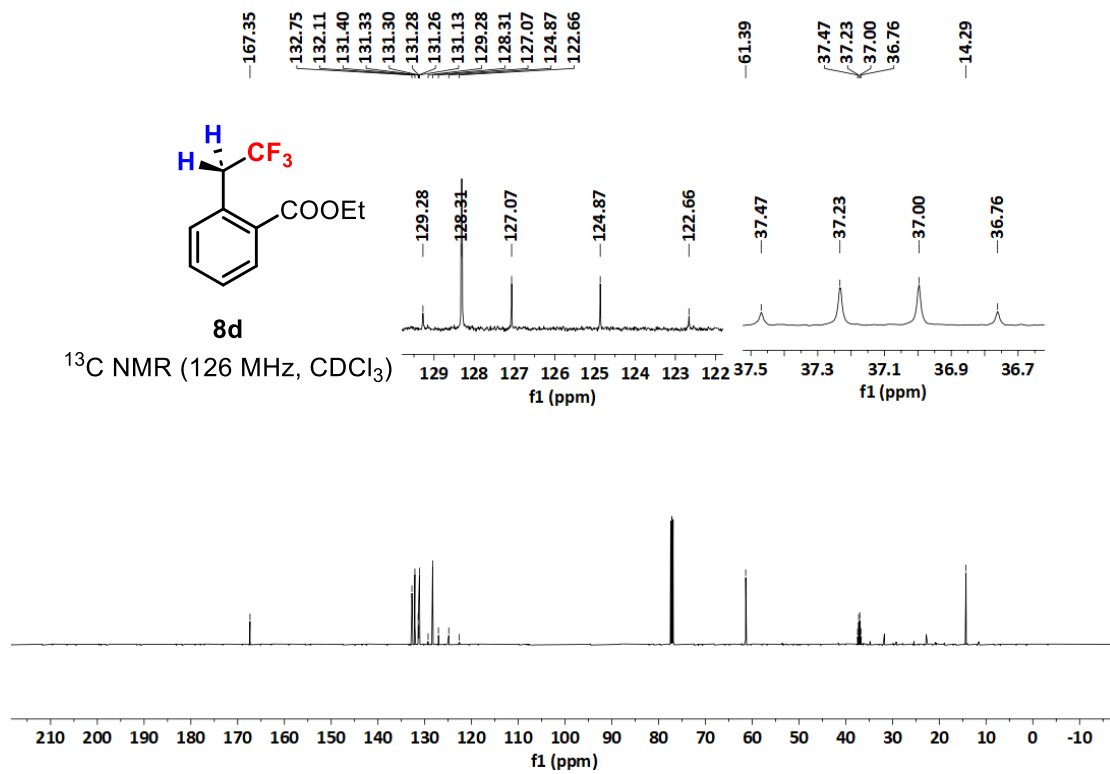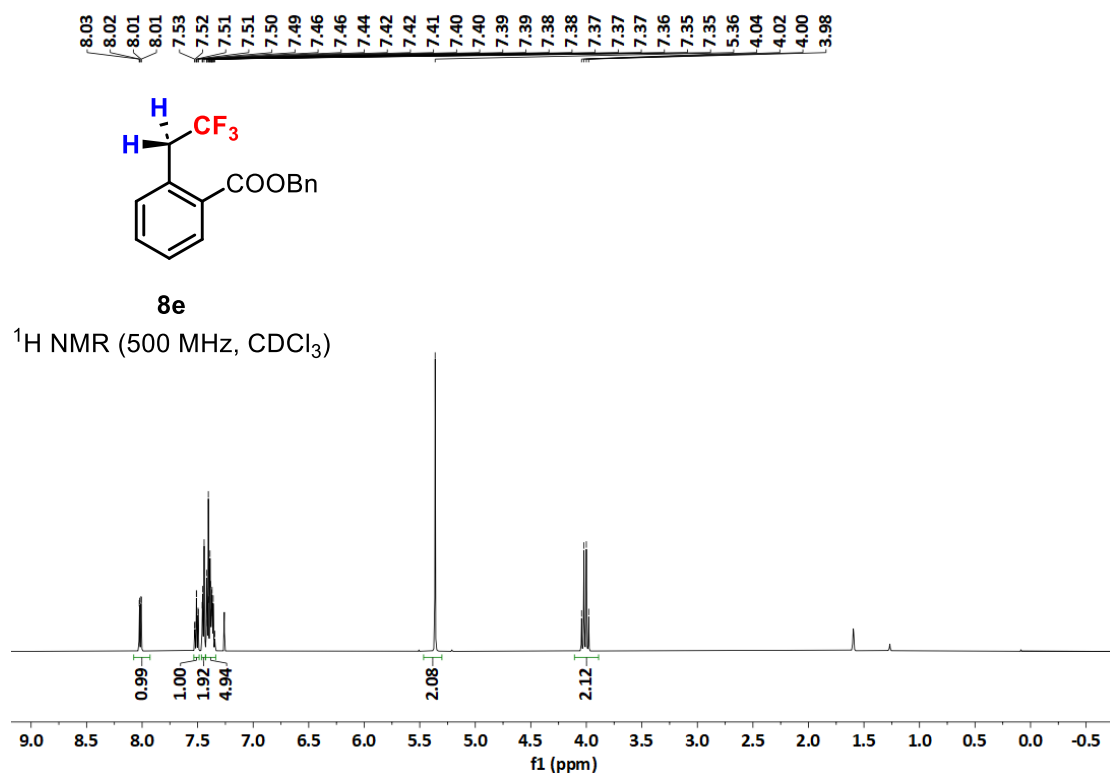

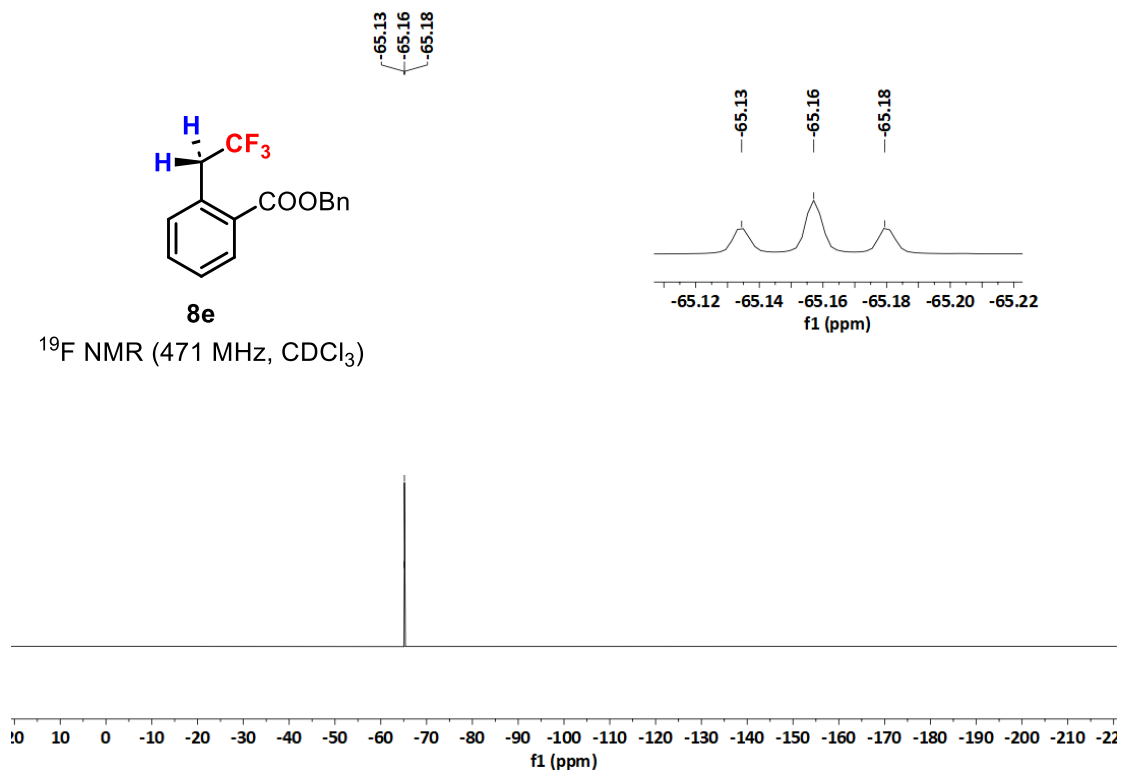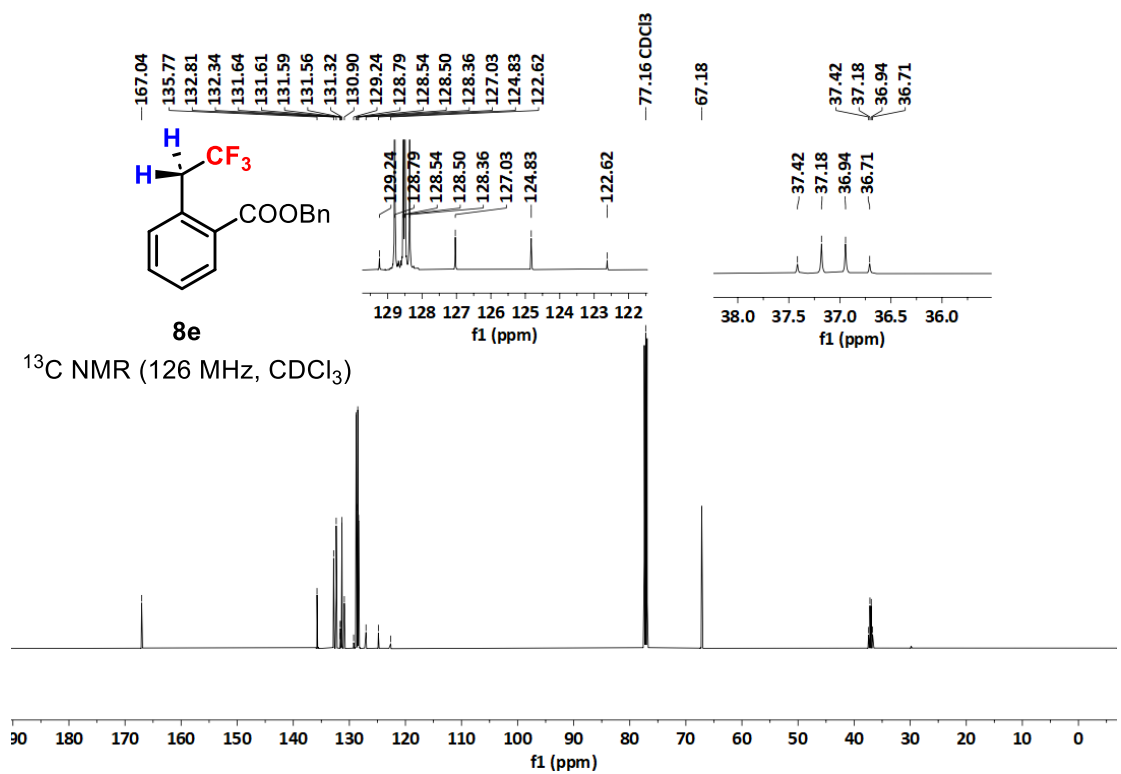

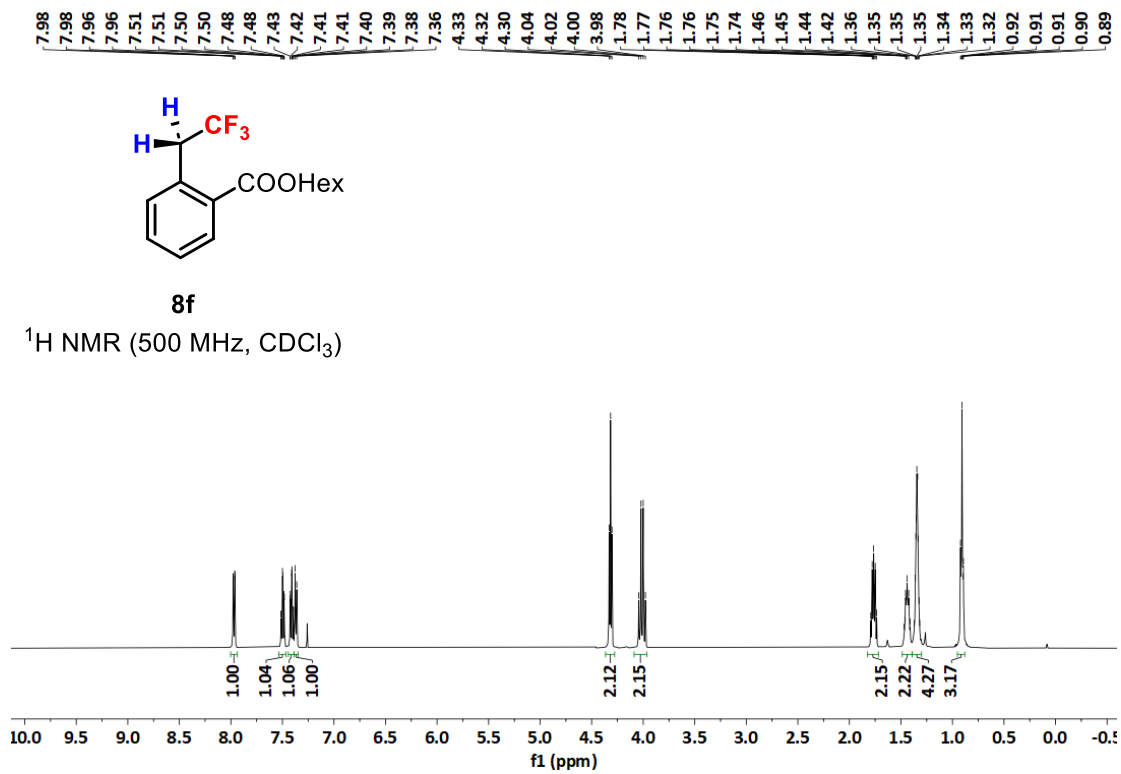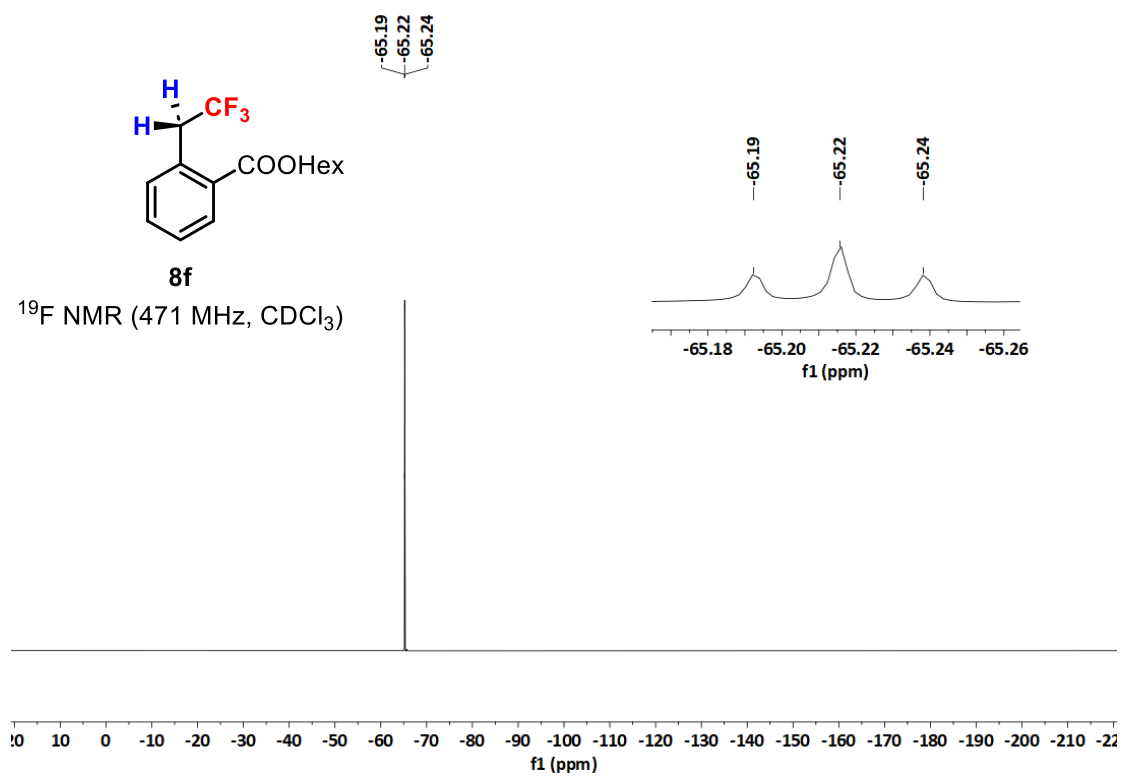

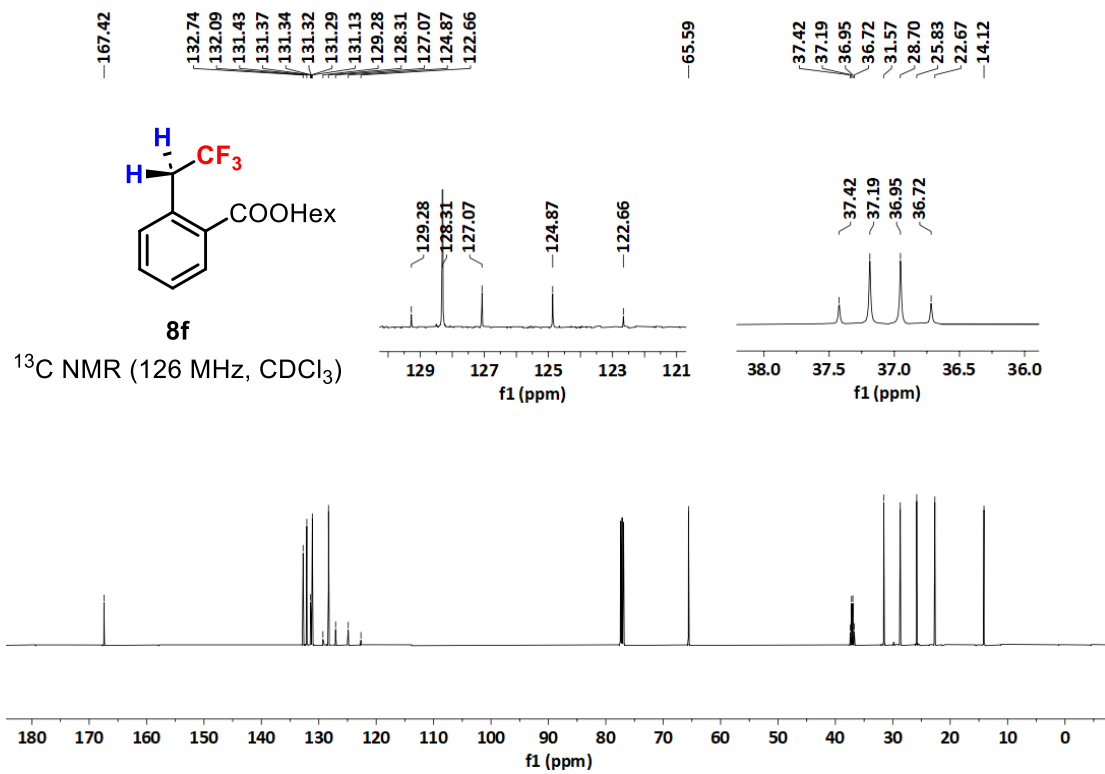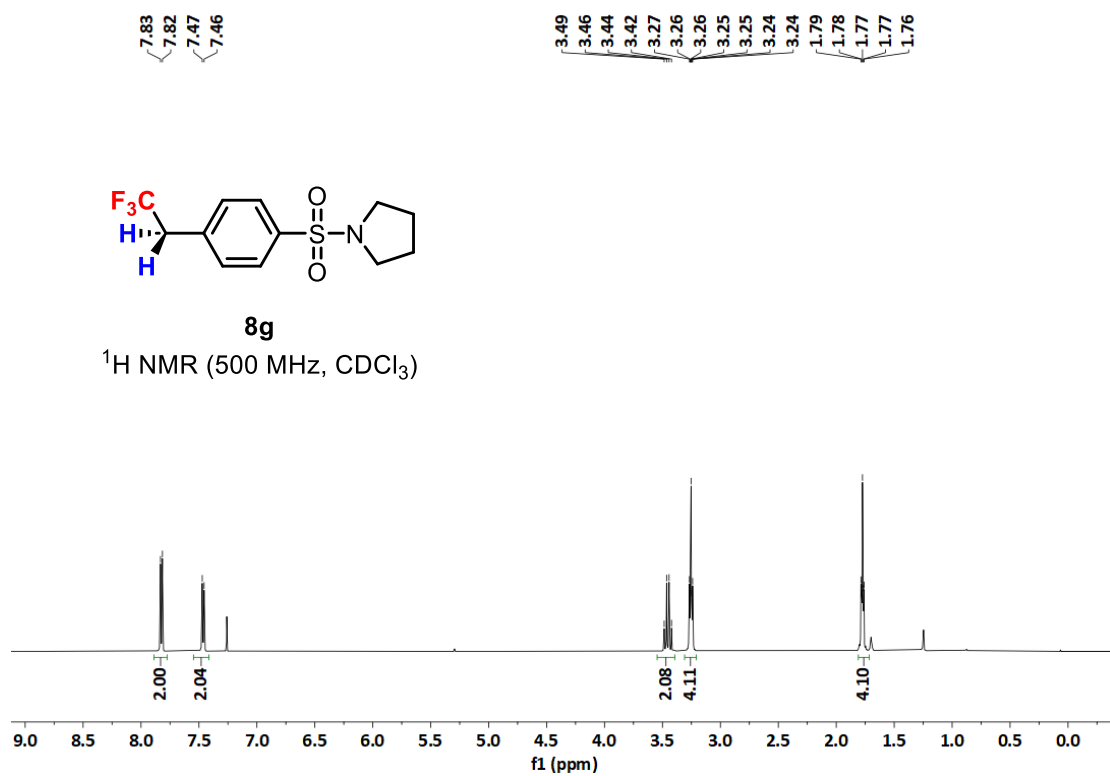



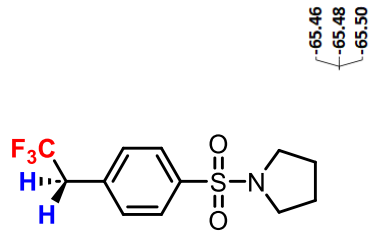

**8g**

$^{19}\text{F}$  NMR (471 MHz,  $\text{CDCl}_3$ )

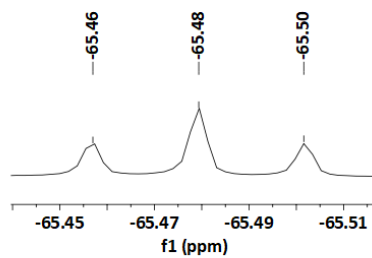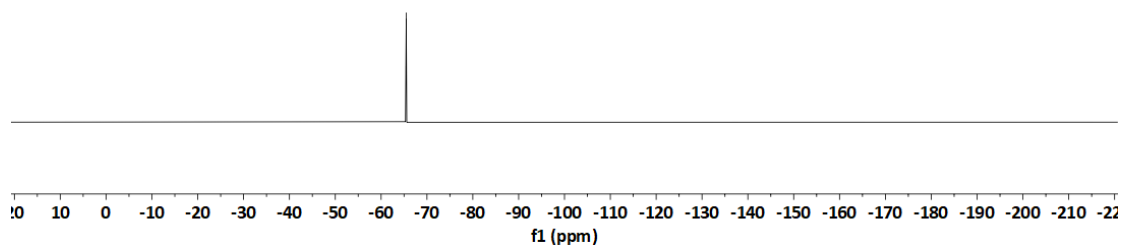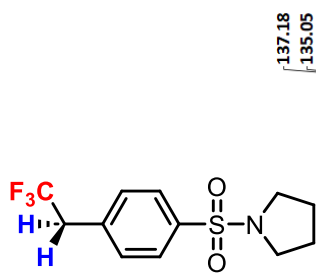

**8g**

$^{13}\text{C}$  NMR (126 MHz,  $\text{CDCl}_3$ )

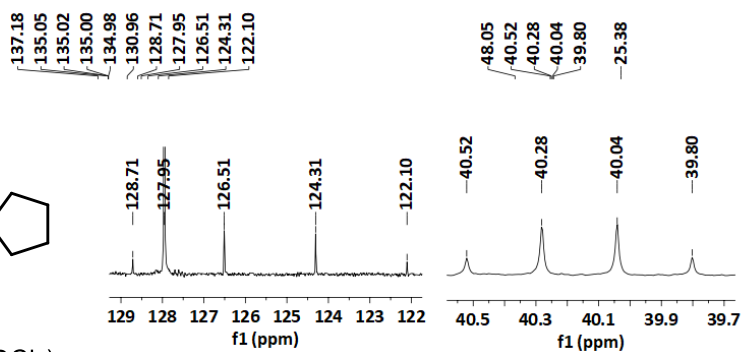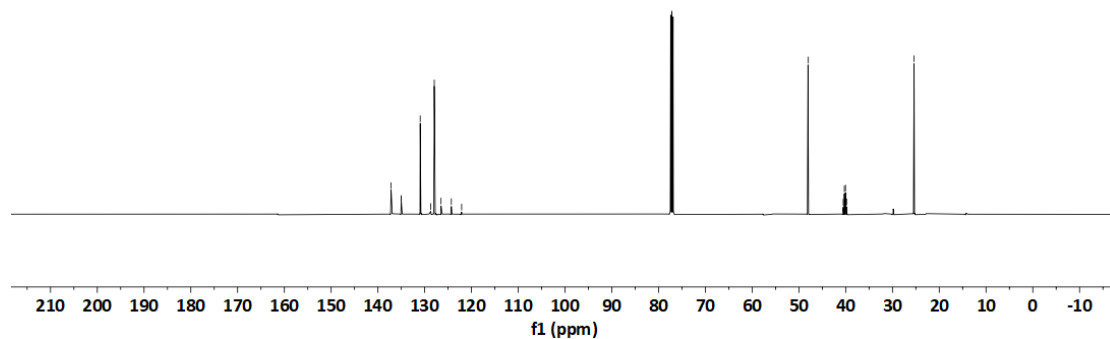

7.99  
7.98  
7.97  
7.97  
7.96  
7.96  
7.95  
7.95  
7.93  
7.91  
7.46  
7.44  
7.21  
7.21  
7.20  
7.19  
7.18  
7.18  
7.17  
7.17

3.46  
3.44  
3.42  
3.39

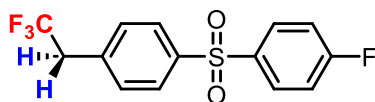

**8h**

$^1\text{H}$  NMR (500 MHz,  $\text{CDCl}_3$ )

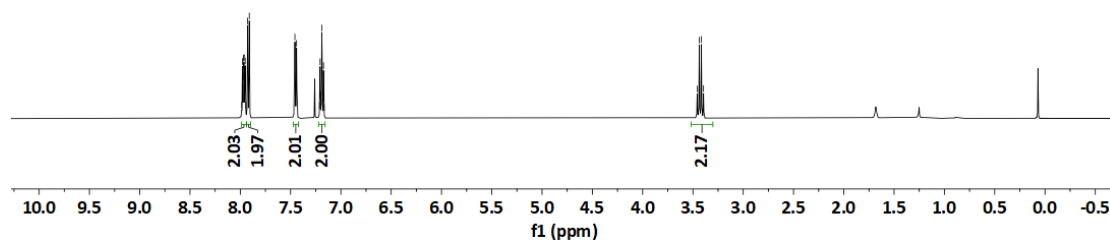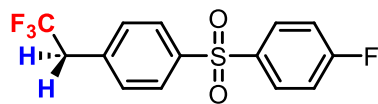

**8h**

$^{19}\text{F}$  NMR (471 MHz,  $\text{CDCl}_3$ )

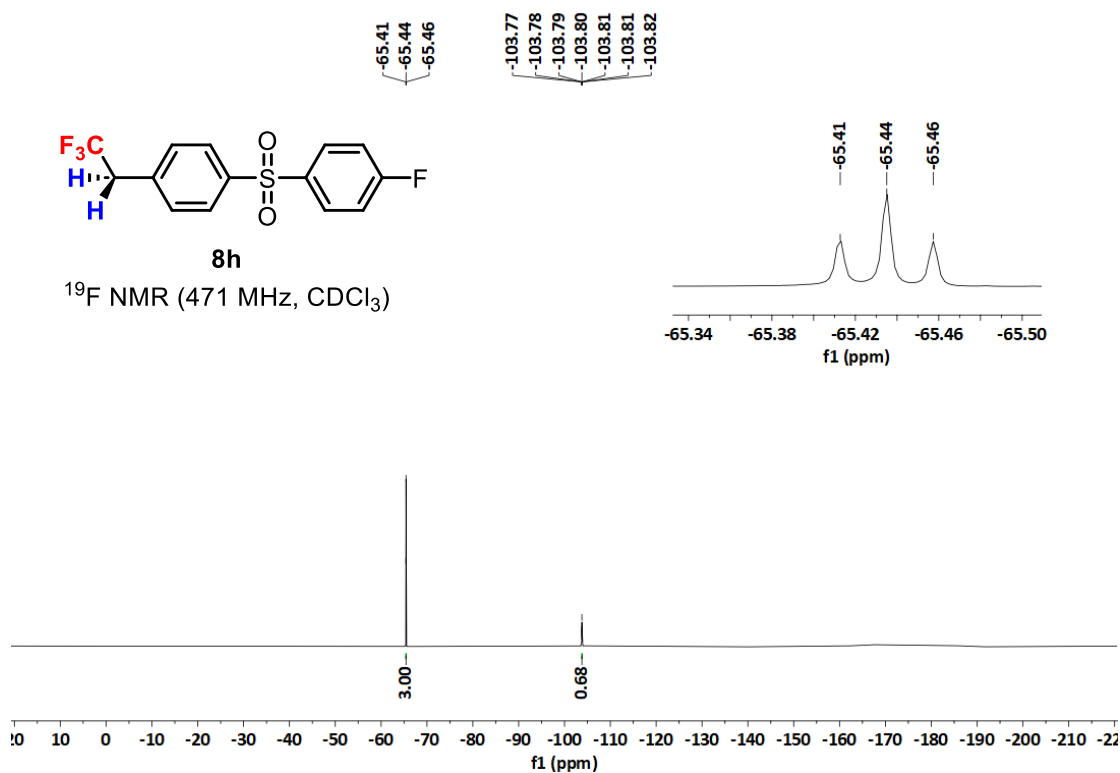

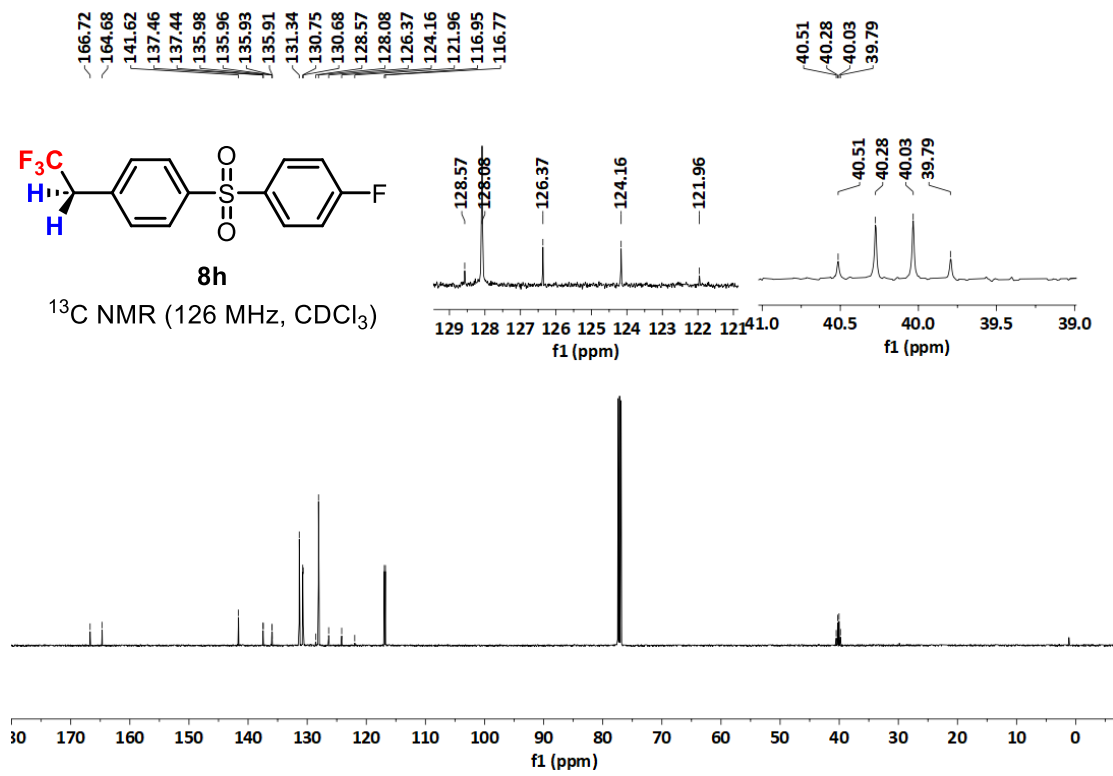

Supplement: d4qo00433g1.pdf [file d4qo00433g1.pdf]
